# Supplementary material for: Effect of conjugation and aromaticity of 3,6 di-substituted carbazoles on triplet energy and the implication of triplet energy in multiple-cyclic aromatic compounds
Source: Royal Society of Chemistry journal article supplement (doi:10.1039/c8ra00674a), 2018-01-01
Supplement: c8ra00674a1.pdf [file c8ra00674a1.pdf]

Electronic Supporting Information (ESI) for

**Effect of Conjugation and Aromaticity of 3,6 Di-substituted Carbazole On  
Triplet Energy**

Kai Lin Woon<sup>a\*</sup>, Azhar Ariffin<sup>b\*\*</sup>, Kar Wei Ho<sup>b</sup>, Show-An Chen<sup>c</sup>

<sup>a</sup>Low Dimensional Materials Research Center, Department of Physics, University of Malaya, Malaysia

<sup>b</sup>Department of Chemistry, University of Malaya, 50603 Kuala Lumpur, Malaysia

<sup>c</sup>Department of Chemical Engineering and Frontier Research Center on Fundamental and Applied Sciences of Matters, National Tsing-Hua University, 101, Section 2, Kuang-Fu Road, 30041 Hsinchu, Taiwan, ROC

**Contents**

|            |                                                                                |           |
|------------|--------------------------------------------------------------------------------|-----------|
| <b>I</b>   | <b>General methods.....</b>                                                    | <b>1</b>  |
| <b>II</b>  | <b>Synthesis procedures .....</b>                                              | <b>2</b>  |
| <b>III</b> | <b>Copies of 1H, 13C NMR and mass spectrum for synthesized compounds .....</b> | <b>13</b> |
| <b>IV</b>  | <b>Torsional Angle .....</b>                                                   | <b>32</b> |
| <b>V</b>   | <b>Coordinates of Stationary Points in xyz format .....</b>                    | <b>33</b> |

## **I. General methods**

Proton and carbon nuclear magnetic resonance spectroscopy ( $^1\text{H}$  NMR and  $^{13}\text{C}$  NMR spectra) were obtained on a Bruker AVANCE III 400 MHz FT-NMR spectrometer using deuterated chloroform as the solvent with tetramethylsilane (TMS) as internal standard. Matrix-assisted laser desorption/ionization time of flight (MALDI-TOF) measurements were carried out with a Bruker Microflex series spectrometer in order to measure the molecular masses. 2,5-dihydroxybenzoic acid (DHB) was used as matrix.

## II. Synthesis procedures

### Bis(4-bromophenyl)diphenylsilane, (1), Known compound.

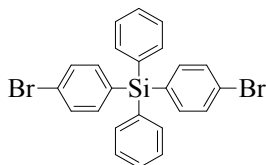

Compound **1** was prepared according to modified procedure from the literature.<sup>20</sup> 1,4-Dibromobenzene (4.20 g, 17.8 mmol) was dissolved in 15mL dry THF under nitrogen atmosphere. The solution was cooled to -78 °C. 9.6 mL of n-BuLi (2.0 M in cyclohexane) was added dropwise and stir for 1 h. Dichlorodiphenylsilane (1.68 mL, 8 mmol) was added slowly at -78 °C. The mixture was stirred overnight while allowing the temperature to rise to room temperature. The reaction was then quenched with water and extracted with chloroform. The organic layer was dried over anhydrous sodium sulfate. After the solvent was evaporated, the crude product was purified by recrystallization from ethanol to afford white solid (2.54 g, 64.3 %). **Melting point = 160-162 °C.** <sup>1</sup>H NMR (CDCl<sub>3</sub>, 400 MHz): δ (ppm) = 7.57-7.52 (m, 8H), 7.48-7.38 (m, 10H). <sup>13</sup>C NMR (CDCl<sub>3</sub>, 100 MHz): δ (ppm) = 137.93, 136.32, 134.98, 133.36, 131.14, 129.88, 128.02, 124.82.

### 3,6-Diiodocarbazole, (2), Known compound.

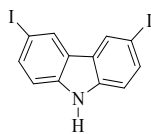

Carbazole (8.36 g, 50 mmol) was dissolved in boiling acetic acid (200 mL). To the solution, potassium iodide (10.8 g, 50 mmol) was added. The solution was cooled and potassium iodate (21.5 g, 50 mmol) was added. Solution was refluxed at 80 °C for 1 h. The solution was decanted from undissolved potassium iodate and it was allowed to cool to room temperature. The crude product obtained was filtered and recrystallized from dichloromethane to give brown solid (13.97 g, 66.7%). **Melting point = 208 - 210 °C.** <sup>1</sup>H NMR (CDCl<sub>3</sub>, 400 MHz): δ (ppm) = 8.36 (s, 2H), 8.14 (br, s, 1H), 7.71 (dd, 2H, J=8.50, 1.65 Hz), 7.24 (d, 2H, J=8.56 Hz). <sup>13</sup>C NMR (CDCl<sub>3</sub>, 100 MHz): δ (ppm) = 138.53, 134.83, 129.40, 124.58, 112.70, 82.44.

**3,6-bis(4-(tert-butyl)phenyl)-9H-carbazole, (3), Known compound.**

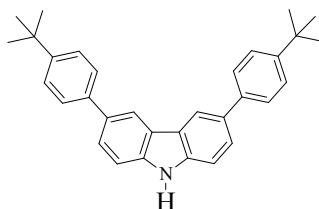

Compound **3** was prepared using Suzuki coupling reaction. 4-*Tert*-butylphenylboronic acid (1.1 g, 6.2 mmol) and compound **4** (1.25 g, 3 mmol) were dissolved in 25 ml toluene in a round bottom flask under nitrogen. A solution of potassium carbonate (2M, 1.7 ml) was added to the solution. tetrakis(triphenylphosphine)palladium(0) (0.14 g, 0.12 mmol) was added. The reaction mixture was reflux for 24 h under nitrogen. After cooling to room temperature, the reaction mixture was evaporated to remove solvent and extracted with chloroform and water. The organic layer was removed under reduced pressure, and the residue was subjected to a column chromatography using hexane/ethyl acetate as the eluent to obtain white solid (yield 85.6%, 1.11 g). **Melting point , decompose > 200 °C** <sup>1</sup>H NMR (400 MHz, CDCl<sub>3</sub>) δ [ppm]: 8.34 (d, *J*=1.71 Hz, 2H), 8.13 (s, 1H), 7.66 – 7.73 (m, 6H), 7.49 – 7.56 (m, 6H), 1.42 (s, 18H). <sup>13</sup>C NMR (100 MHz, CDCl<sub>3</sub>) δ [ppm]: 149.46, 139.30, 139.16, 132.99, 126.92, 125.72, 125.52, 124.04, 118.71, 110.85, 34.51, 31.44. HRMS (MALDI-TOF) *m/z*: [M]<sup>+</sup> Calcd for C<sub>32</sub>H<sub>33</sub>N 431.2613; Found 431.165.

**3,6-bis(3-methoxyphenyl)-9H-carbazole (4), known compound.**

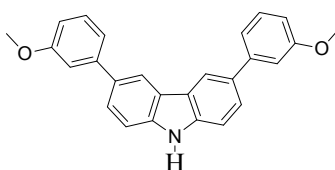

Compound **4** was prepared using Suzuki coupling reaction. 3-Methoxyphenylboronic acid (3.17 g, 20.9 mmol) and compound **2** (3.98 g, 9.49 mmol) were dissolved in 40 ml toluene in a round bottom flask under nitrogen. A solution of potassium carbonate (2M, 10 ml) was added to the solution. tetrakis(triphenylphosphine)palladium(0) (0.47 g, 0.41 mmol) was added. The reaction mixture was reflux for 24 h under nitrogen. After cooling to room temperature, the reaction mixture was evaporated to remove solvent and extracted with chloroform and water. The organic layer was removed under

reduced pressure, and the residue was subjected to a column chromatography using hexane/ethyl acetate as the eluent to obtain white solid **6** (yield 17.4%, 0.63 g). **Melting point , decompose > 200 °C.** <sup>1</sup>H NMR (400 MHz, CDCl<sub>3</sub>) δ [ppm]: 8.36 (d, *J*=1.83 Hz, 2H), 8.17 (s, 1H), 7.72 (dd, *J*=8.24, 1.83 Hz, 2H), 7.53, (d, *J*=8.24 Hz, 2H), 7.38 – 7.48 (m, 2H), 7.31 – 7.37 (m, 2H), 7.24 – 7.31 (m, 2H), 6.87 – 7.00 (m, 2H), 3.94 (s, 6H). <sup>13</sup>C NMR (100 MHz, CDCl<sub>3</sub>) δ [ppm]: 160.07, 143.63, 139.58, 133.12, 129.83, 125.75, 124.05, 119.93, 119.04, 113.06, 112.09, 110.99, 55.44. HRMS (MALDI-TOF) *m/z*: [M]<sup>+</sup> Calcd for C<sub>26</sub>H<sub>21</sub>NO<sub>2</sub> 379.1572; Found 378.868.

**3,6-bis(4-fluorophenyl)-9H-carbazole, (5), known compound.**

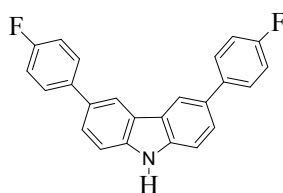

Compound **5** was prepared using Suzuki coupling reaction. 4-fluorophenylboronic acid (0.93 g, 6.7 mmol) and compound **2** (1.27 g, 3.03 mmol) were dissolved in 24 ml toluene in a round bottom flask under nitrogen. A solution of potassium carbonate (2M, 6 ml) was added to the solution. tetrakis(triphenyl-phosphine)palladium(0) (0.13 g, 0.11 mmol) was added. The reaction mixture was reflux for 24 h under nitrogen. After cooling to room temperature, the reaction mixture was evaporated to remove solvent and extracted with chloroform and water. The organic layer was removed under reduced pressure, and the residue was subjected to a column chromatography using hexane/ethyl acetate as the eluent to obtain white solid **7** (yield 30.4%, 0.33 g). **Melting point , decompose > 200 °C.** <sup>1</sup>H NMR (400 MHz, CDCl<sub>3</sub>) δ [ppm]: 8.29 (s, 2H), 8.17 (br. s., 1H), 7.62 – 7.72 (m, 6H), 7.53 (d, *J*=8.44 Hz, 2H), 7.19 (t, *J*=8.68 Hz, 4H). <sup>13</sup>C NMR (100 MHz, CDCl<sub>3</sub>) δ [ppm]: 163.34, 160.90, 139.36, 138.15, 132.32, 128.80, 128.71, 125.58, 123.97, 118.79, 115.69, 115.48, 111.01. HRMS (MALDI-TOF) *m/z*: [M]<sup>+</sup> Calcd for C<sub>24</sub>H<sub>15</sub>F<sub>2</sub>N 355.1173; Found 355.779.

**3,6-bis(4-methoxyphenyl)-9H-carbazole, (6), known compound.**

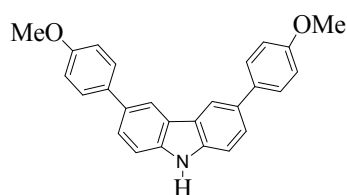

Compound **6** was prepared using Suzuki coupling reaction. 4-methoxyphenylboronic acid (1.31 g, 8.6 mmol) and compound **2** (1.51 g, 3.6 mmol) were dissolved in 30 ml toluene in a round bottom flask

under nitrogen. A solution of potassium carbonate (2M, 3.6 ml) was added to the solution. tetrakis(triphenyl-phosphine)palladium(0) (0.17 g, 0.14 mmol) was added. The reaction mixture was reflux for 24 h under nitrogen. After cooling to room temperature, the reaction mixture was evaporated to remove solvent and extracted with chloroform and water. The organic layer was removed under reduced pressure, and the residue was subjected to a column chromatography using hexane/ethyl acetate as the eluent to obtain white solid **8** (yield 43.5%, 1.13 g). **Melting point = 198-200 °C** <sup>1</sup>H NMR (600 MHz, CDCl<sub>3</sub>) δ [ppm]: 8.30 (s, 2H), 8.10 (br. s., 1H), 7.60 – 7.78 (m, 6H), 7.50 (d, *J*=8.25 Hz, 2H), 6.97 – 7.09 (m, 4H), 3.90 (s, 6H). <sup>13</sup>C NMR (100 MHz, CDCl<sub>3</sub>) δ [ppm]: 158.65, 139.10, 134.74, 132.82, 128.27, 125.32, 124.05, 118.43, 114.24, 110.85, 55.40. HRMS (MALDI-TOF) *m/z*: [M]<sup>+</sup> Calcd for C<sub>26</sub>H<sub>21</sub>NO<sub>2</sub> 379.1572; Found 379.511.

**3,6-diiodo-9-tosyl-9H-carbazole, (8), known compound.**

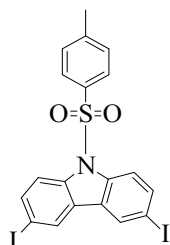

Compound **8** was prepared according to procedure from the literature.<sup>2</sup> To a solution of compound **2** (2.01 g, 4.8 mmol) in *N,N*-dimethylformamide (20 ml) was added sodium hydride (0.84 g, 35 mmol) at 0 °C, and stirred for 10 mins. Subsequently, *p*-toluenesulfonyl chloride (2.9 g, 15.8 mmol) was added to this mixture and stirred at 0°C for 4 h. the mixture was diluted with water and the precipitates were filtered. The crude product was recrystallized from dichloromethane to afford compound **8** (3.0 g, 62.4 %) as white solid. **Melting point , decompose > 250 °C** <sup>1</sup>H NMR (400 MHz, CDCl<sub>3</sub>) δ [ppm]: 8.20 (d, *J*=1.59 Hz, 2H), 8.10 (d, *J*=8.80 Hz, 2H), 7.80 (dd, *J*=8.74 Hz, 2H), 7.67 (d, *J*=8.44 Hz, 2H), 7.16 (d, *J*=8.07 Hz, 2H), 2.32 (s, 3H). <sup>13</sup>C NMR (100 MHz, CDCl<sub>3</sub>) δ [ppm]: 145.49, 137.82, 136.55, 134.43, 129.90, 129.17, 127.19, 126.46, 116.98, 87.96, 21.56. HRMS (MALDI-TOF) *m/z*: [M]<sup>+</sup> Calcd for C<sub>19</sub>H<sub>13</sub>I<sub>2</sub>NO<sub>2</sub>S 572.8756; Found 572.885.

**3,6-di-tert-butyl-9H-carbazole, (7), known compound.**

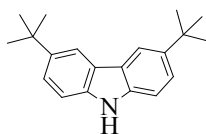

In ice bath of 0 °C, carbazole (20 mmol) was suspended in 100 ml chloroform under nitrogen. AlCl<sub>3</sub> (2.67 g, 20 mmol) was added in portions. *Tert*-butyl chloride (5.3 ml, 24 mmol) was then added drop wise. Then the mixture was stirred for 12 h. The reaction was quenched by ice water, and extracted by chloroform. The organic layer was dried with anhydrous Na<sub>2</sub>SO<sub>4</sub> and the solvent was removed under reduced pressure to obtain white solid. Yield: 82.6%. **Melting point = 230-233 °C**. <sup>1</sup>H NMR (400 MHz, CDCl<sub>3</sub>) δ [ppm]: 8.10 (s, 2H), 7.88 (br. s., 1H), 7.49 (d, *J*=8.44 Hz, 2H), 7.36 (d, *J*=8.44 Hz, 2H), 1.48 (s, 18 H). <sup>13</sup>C NMR (100 MHz, CDCl<sub>3</sub>) δ [ppm]: 142.24, 138.02, 123.52, 123.33, 116.18, 109.98, 34.69, 32.04. HRMS (MALDI-TOF) *m/z*: [M]<sup>+</sup> Calcd for C<sub>20</sub>H<sub>25</sub>N 279.1987; Found 279.235.

**3,3'',6,6''-tetrakis(4-methoxyphenyl)-9'-tosyl-9'H-9,3':6',9''-tercarbazole (9), New compound.**

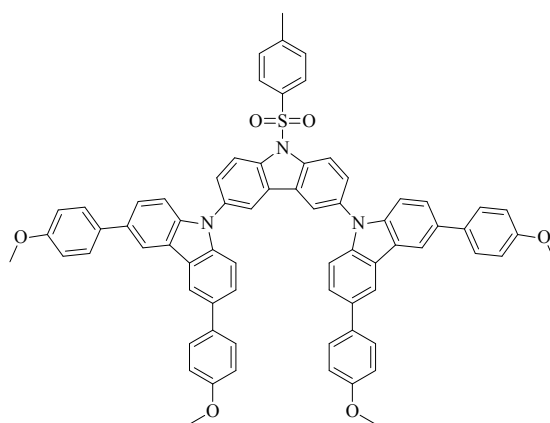

Compound **9** was prepared according to procedure from the literature.<sup>1</sup> A solution of compound **8** (1.16 g, 2.03 mmol) and compound **6** (1.68 g, 4.42 mmol) in *N,N*-dimethylacetamide (10 ml) was prepared. Copper oxide (0.59 g, 4.1 mmol) was added to the solution. The mixture was then refluxed for 48 h and cooled to room temperature. After cooling to room temperature, the reaction mixture was evaporated under reduced pressure to remove solvent and extracted with chloroform and water. The organic layer was evaporated under reduced pressure, and the residue was subjected to a column chromatography using hexane/ethyl acetate as the eluent to obtain white solid with (yield 49.1 %, 1.07 g). **Melting point , decompose > 300 °C**. <sup>1</sup>H NMR (400 MHz, CDCl<sub>3</sub>) δ [ppm]: 8.66 (d, *J*=8.80 Hz, 2H), 8.36 (d, *J*=1.35 Hz, 4H), 8.18 (d, *J*=1.83 Hz, 2H), 7.98 (d, *J*=8.44 Hz, 2H), 7.83 (dd, *J*=8.93, 2.08 Hz, 2H), 7.66 (d, *J*=8.80 Hz, 8H), 7.63 (dd, *J*=8.25, 1.83 Hz, 4H), 7.46 (d, *J*=8.56 Hz, 4H), 7.35 (d, *J*=8.07 Hz, 2H), 7.04 (d, *J*=8.80 Hz, 8H), 3.90 (s, 12H), 2.44 (s, 3H). <sup>13</sup>C NMR (100 MHz, CDCl<sub>3</sub>) δ [ppm]: 158.75, 140.74, 137.71, 135.05, 134.51, 134.08, 133.51, 130.17, 128.35, 128.29, 127.06, 126.82, 125.49, 125.46, 124.09, 118.88, 118.50, 116.47, 114.28, 109.87, 55.41, 21.73. HRMS (MALDI-TOF) *m/z*: [M]<sup>+</sup> Calcd for

C<sub>71</sub>H<sub>53</sub>N<sub>3</sub>O<sub>6</sub>S 1075.3655; Found 1075.875.

**3,3'',6,6''-tetra-tert-butyl-9'-tosyl-9'H-9,3':6',9''-tercarbazole (10), Known compound.**

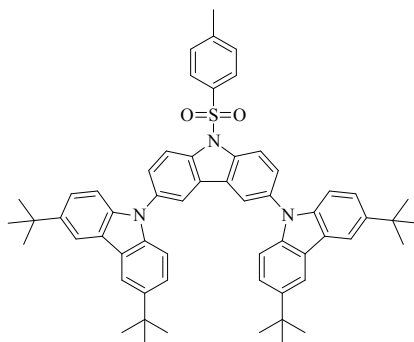

Compound **10** was prepared according to procedure from the literature.<sup>1</sup> A solution of compound **8** (1.44 g, 2.51 mmol) and compound **7** (1.54 g, 5.5 mmol) in *N,N*-dimethylacetamide (10 ml) was prepared. Copper oxide (0.73 g, 5.1 mmol) was added to the solution. The mixture was then refluxed for 48 h and cooled to room temperature. After cooling to room temperature, the reaction mixture was evaporated under reduced pressure to remove solvent and extracted with chloroform and water. The organic layer was evaporated under reduced pressure, and the residue was subjected to a column chromatography using hexane/ethyl acetate as the eluent to obtain white solid with yield of 65.5% (1.44 g). **Melting point = decompose > 300 °C.** <sup>1</sup>H NMR (600M Hz, CDCl<sub>3</sub>) δ [ppm]: 8.59 (d, *J*=8.80 Hz, 2H), 8.16 (d, *J*=1.65 Hz, 4H), 8.07 (d, *J*=2.02 Hz, 2H), 7.94 (d, *J*=8.25 Hz, 2H), 7.75 (dd, *J*=8.80, 2.20 Hz, 2H), 7.47 (dd, *J*=8.62, 2.02 Hz, 4H), 7.35 (d, *J*=8.25 Hz, 4H), 7.32 (d, *J*=8.25 Hz, 2H), 2.42 (s, 3H), 1.48 (s, 36H). <sup>13</sup>C NMR (100 MHz, CDCl<sub>3</sub>) δ [ppm]: 145.49, 143.02, 139.51, 137.38, 135.02, 134.54, 130.07, 127.09, 126.77, 123.70, 123.38, 118.50, 116.32, 108.97, 34.74, 32.00, 21.69. HRMS (MALDI-TOF) *m/z*: [M]<sup>+</sup> Calcd for C<sub>59</sub>H<sub>61</sub>N<sub>3</sub>O<sub>2</sub>S 875.4484; Found 875.756.

**3,3'',6,6''-tetrakis(4-methoxyphenyl)-9'H-9,3':6',9''-tercarbazole (11), New compound.**

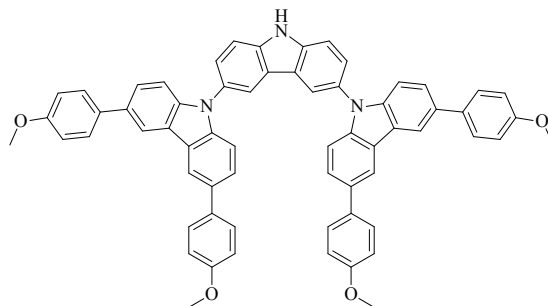

Compound **11** was prepared according to the procedure from the literature.<sup>1</sup> To a solution of compound **9** (1.04 g, 0.965 mmol) in 9 ml tetrahydrofuran were added dimethyl sulfoxide (2.45 ml) and water (1.0



ml), and the mixture was stirred for 10 mins. Subsequently, potassium hydroxide (1.36 g, 0.024 mol) was added to this mixture, and the reaction mixture was refluxed for 4 hours, cooled to room temperature and diluted with water. After neutralization with HCl solution, the crude product was filtered and recrystallized from dichloromethane-hexane (1:1) to give compound **11** as white solid (yield 99.4 %, 0.884 g). **Melting point , decompose > 300 °C**,  $^1\text{H NMR}$  (600 MHz,  $\text{CDCl}_3$ )  $\delta$  [ppm]: 8.62 (br. s., 1H), 8.25 – 8.44 (m, 6H), 7.40 – 7.82 (m, 20H), 7.04 (d,  $J=8.80$  Hz, 8H), 3.89 (s, 12H).  $^{13}\text{C NMR}$  (100 MHz,  $\text{CDCl}_3$ )  $\delta$  [ppm]: 158.66, 146.60, 141.42, 139.33, 134.73, 130.06, 128.30, 126.11, 125.35, 123.82, 120.44, 119.70, 118.41, 114.25, 112.13, 110.03, 55.40. HRMS (MALDI-TOF)  $m/z$ :  $[\text{M}]^+$  Calcd for  $\text{C}_{64}\text{H}_{47}\text{N}_3\text{O}_4$  921.3567; Found 921.795.

### **3,3'',6,6''-tetra-tert-butyl-9'H-9,3':6',9''-tercarbazole (12), Known compound.**

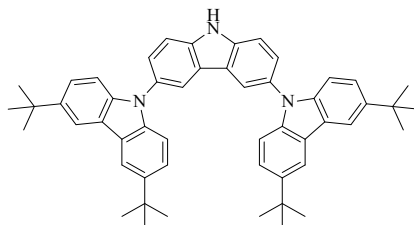

Compound **12** was prepared according to the procedure from the literature.<sup>1</sup> To a solution of compound **10** (1.39 g, 1.59 mmol) in 10 ml tetrahydrofuran were added dimethyl sulfoxide (4.8 ml) and water (1.6 ml), and the mixture was stirred for 10 mins. Subsequently, potassium hydroxide (1.59 g, 0.03 mol) was added to this mixture, and the reaction mixture was refluxed for 4 hours, cooled to room temperature and diluted with water. After neutralization with HCl solution, the crude product was filtered and recrystallized from dichloromethane-hexane (1:1) to give compound **12** as white solid (yield 99.5%, 1.14 g). **Melting point , decompose > 300 °C**.  $^1\text{H NMR}$  (600 MHz,  $\text{CDCl}_3$ )  $\delta$  [ppm]: 8.52 (br. s., 1H), 8.18 (d,  $J=1.65$  Hz, 6H), 7.70 (d,  $J=8.16$  Hz, 2H), 7.63 (dd,  $J=8.48, 1.88$  Hz, 2H), 7.47 (dd,  $J=8.57, 1.65$  Hz, 4H), 7.33 (d,  $J=8.07$  Hz, 4H), 1.48 (s, 36H).  $^{13}\text{C NMR}$  (100 MHz,  $\text{CDCl}_3$ )  $\delta$  [ppm]: 142.50, 140.19, 139.07, 125.97, 124.11, 123.54, 123.07, 119.43, 116.18, 111.84, 109.11, 102.16, 34.73, 32.05 HRMS (MALDI-TOF)  $m/z$ :  $[\text{M}]^+$  Calcd for  $\text{C}_{52}\text{H}_{55}\text{N}_3$  721.4396; Found 721.654.

### **Bis(4-(3,6-bis(4-(tert-butyl)phenyl)-9H-carbazol-9-yl)phenyl)diphenylsilane, P1, New compound.**

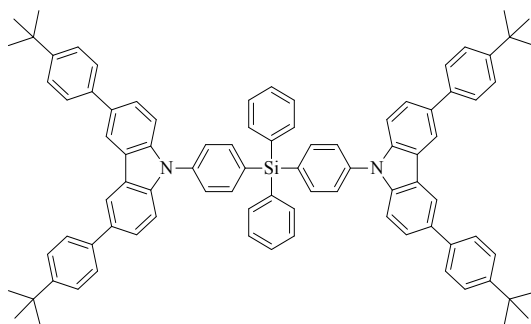

Compound **1** (0.25 g, 0.51 mmol), carbazole **3** (0.48 g, 1.12 mmol), copper powder (0.13 g, 2.05 mmol), and 18-Crown-6 (0.013 g, 0.049 mmol) and  $K_2CO_3$  (0.55 g, 4.0 mmol) were dissolved in 4 ml anhydrous *o*-dichlorobenzene under nitrogen atmosphere. The reaction mixture was refluxed for 72 h at 180 °C. After cooling to room temperature, the mixture was diluted in dichloromethane and filtered through silica gel. The filtrate was evaporated under reduced pressure to give crude product, which purified through column chromatography to give white powdery product (yield 20.1 %, 0.123g). **Melting point , decompose > 300 °C.**  $^1H$  NMR (400 MHz,  $CDCl_3$ )  $\delta$  [ppm]: 8.41 (d,  $J=1.47$  Hz, 4H), 7.95 (d,  $J=8.31$  Hz, 4H), 7.46 – 7.80 (m, 38H), 1.42 (s, 36H).  $^{13}C$  NMR (100 MHz,  $CDCl_3$ )  $\delta$  [ppm]: 149.63, 140.32, 139.26, 138.98, 137.99, 136.48, 133.71, 133.55, 133.23, 130.09, 128.24, 126.95, 126.11, 125.77, 125.61, 124.25, 118.71, 110.25, 34.52, 31.43. HRMS (MALDI-TOF)  $m/z$ :  $[M]^+$  Calcd for  $C_{88}H_{82}N_2Si$  1194.6247; Found 1195.097.

**Bis(4-(3,6-bis(3-methoxyphenyl)-9H-carbazol-9-yl)phenyl)diphenylsilane, P2. New compound.**

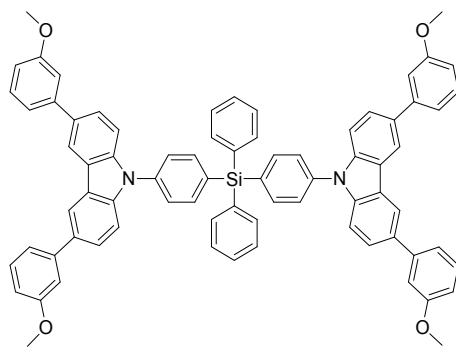

Compound **1** (0.20 g, 0.404 mmol), carbazole **4** (0.33 g, 0.86 mmol), copper powder (0.10 g, 1.57 mmol), and 18-Crown-6 (0.011 g, 0.042 mmol) and  $K_2CO_3$  (0.44 g, 3.2 mmol) were dissolved in 4 ml anhydrous *o*-dichlorobenzene under nitrogen atmosphere. The reaction mixture was refluxed for 72 h at 180 °C. After cooling to room temperature, the mixture was diluted in dichloromethane and filtered through silica gel. The filtrate was evaporated under reduced pressure to give crude product, which purified through column chromatography to give white powdery product (yield 27.7%, 0.122 g). **Melting point ,**

**decompose > 300 °C.** <sup>1</sup>H NMR (600 MHz, CDCl<sub>3</sub>) δ [ppm]: 8.43 (d, *J*=1.47 Hz, 4H), 7.96 (d, *J*=8.25 Hz, 4H), 7.79 (dd, *J*=7.98, 1.56 Hz, 4H), 7.75 (d, *J*=8.25 Hz, 4H), 7.72 (dd, *J*=8.53, 1.47 Hz, 4H), 7.64 (d, *J*=8.44, 4H), 7.51 – 7.60 (m, 6H), 7.40 – 7.46 (m, 4H), 7.35 (d, *J*=8.07 Hz, 4H), 7.29 – 7.31 (m, 4H), 6.94 (dd, *J*=8.25, 1.83 Hz, 4H), 3.94 (s, 12H). <sup>13</sup>C NMR (100 MHz, CDCl<sub>3</sub>) δ [ppm]: 160.06, 143.37, 140.58, 139.15, 138.03, 136.47, 133.76, 133.48, 133.39, 130.13, 129.81, 128.26, 126.13, 125.75, 124.20, 119.88, 118.97, 113.12, 112.07, 110.32, 55.39. HRMS (MALDI-TOF) *m/z*: [M]<sup>+</sup> Calcd for C<sub>76</sub>H<sub>58</sub>N<sub>2</sub>O<sub>4</sub>Si 1090.4166; Found 1091.070.

**Bis(4-(3,6-bis(4-fluorophenyl)-9H-carbazol-9-yl)phenyl), P3. New compound.**

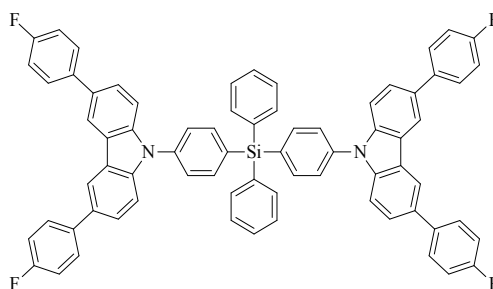

Compound **1** (0.20 g, 0.40 mmol), carbazole **5** (0.31 g, 0.87 mmol), copper powder (0.10 g, 1.57 mmol), and 18-Crown-6 (0.011 g, 0.042 mmol) and K<sub>2</sub>CO<sub>3</sub> (0.44 g, 3.2 mmol) were dissolved in 4 ml anhydrous *o*-dichlorobenzene under nitrogen atmosphere. The reaction mixture was refluxed for 72 h at 180 °C. After cooling to room temperature, the mixture was diluted in dichloromethane and filtered through silica gel. The filtrate was evaporated under reduced pressure to give crude product, which purified through column chromatography to give white powdery product (yield 16.9%, 0.072 g). **Melting point** , **decompose > 300 °C.** <sup>1</sup>H NMR (600 MHz, CDCl<sub>3</sub>) δ [ppm]: 8.33 – 8.38 (m, 4H), 7.97 (d, *J*=8.25 Hz, 2H), 7.41 – 7.84 (m, 32H), 7.15 – 7.24 (m, 8H). <sup>13</sup>C NMR (100 MHz, CDCl<sub>3</sub>) δ [ppm]: 163.03, 161.37, 140.81, 140.44, 139.11, 138.06, 137.95, 136.47, 133.02, 131.19, 130.02, 128.85, 128.81, 128.76, 128.28, 126.13, 125.65, 125.61, 124.19, 118.86, 118.81, 118.75, 115.72, 115.58, 115.55, 110.45, 110.41, 110.27. HRMS (MALDI-TOF) *m/z*: [M]<sup>+</sup> Calcd for C<sub>72</sub>H<sub>46</sub>F<sub>4</sub>N<sub>2</sub>Si 1042.3366; Found 1042.574.

**Diphenylbis(4-(3,3'',6,6''-tetrakis(4-methoxyphenyl)-9'H-[9,3':6',9''-tercarbazol]-9'-yl)phenyl)silane, P4. New compound.**

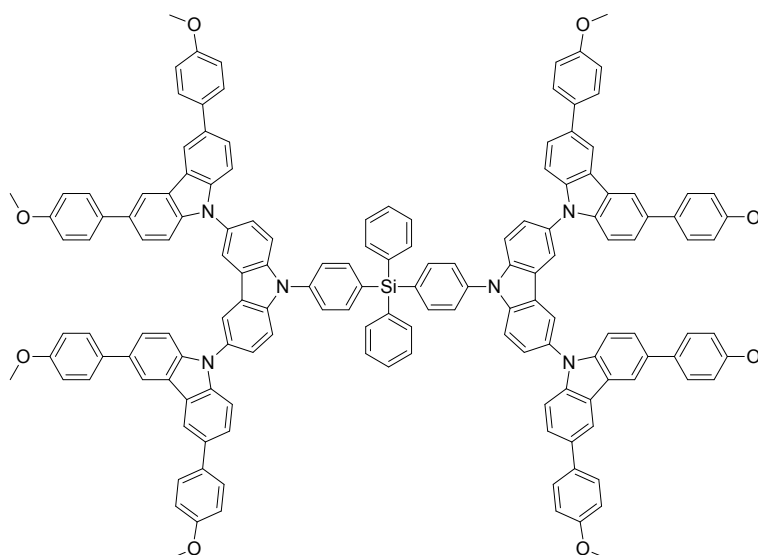

Compound **1** (0.22 g, 0.45 mmol), carbazole **11** (0.89 g, 0.97 mmol), copper powder (0.11 g, 1.73 mmol), and 18-Crown-6 (0.012 g, 0.045 mmol) and  $K_2CO_3$  (0.49 g, 3.5 mmol) were dissolved in 4 ml anhydrous *o*-dichlorobenzene under nitrogen atmosphere. The reaction mixture was refluxed for 72 h at 180 °C. After cooling to room temperature, the mixture was diluted in dichloromethane and filtered through silica gel. The filtrate was evaporated under reduced pressure to give crude product, which purified through column chromatography to give white powdery product (yield 43.3%, 0.41 g). **Melting point** , **decompose** > 300 °C.  $^1H$  NMR (600 MHz,  $CDCl_3$ )  $\delta$  [ppm]: 8.31 – 8.43 (m, 12H), 7.60 – 7.88 (m, 44H), 7.58 – 7.40 (m, 14H), 7.04 (d,  $J=8.62$  Hz, 16H), 3.90 (s, 24H).  $^{13}C$  NMR (100 MHz,  $CDCl_3$ )  $\delta$  [ppm]: 158.67, 141.38, 141.35, 140.77, 136.45, 136.37, 134.73, 133.11, 131.39, 130.34, 130.31, 128.30, 128.25, 127.28, 126.14, 125.37, 123.98, 123.85, 119.59, 118.43, 114.25, 111.41, 110.03, 55.40. . HRMS (MALDI-TOF)  $m/z$ :  $[M]^+$  Calcd for  $C_{152}H_{110}N_6O_8Si$  2174.8154; Found 2175.097.

**Diphenylbis(4-(3,3'',6,6''-tetra-tert-butyl-9'H-[9,3':6',9''-tercarbazol]-9'-yl)phenyl)silane, P5. New compound.**

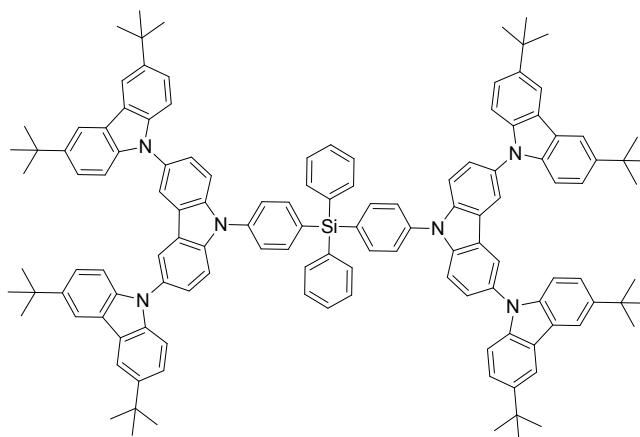

Compound **1** (0.28 g, 0.57 mmol), carbazole **10** (0.87 g, 1.20 mmol), copper powder (0.14 g, 2.20 mmol), and 18-Crown-6 (0.015 g, 0.057 mmol) and K<sub>2</sub>CO<sub>3</sub> (0.61 g, 4.4 mmol) were dissolved in 4.5 ml anhydrous *o*-dichlorobenzene under nitrogen atmosphere. The reaction mixture was refluxed for 72 h at 180 °C. After cooling to room temperature, the mixture was diluted in dichloromethane and filtered through silica gel. The filtrate was evaporated under reduced pressure to give crude product, which purified through column chromatography to give white powdery product (yield 17.9%, 0.178 g). **Melting point , decompose > 300 °C.** <sup>1</sup>H NMR (600 MHz, CDCl<sub>3</sub>) δ [ppm]: 8.27 (d, *J*=1.83 Hz, 4H), 8.18 (d, *J*=1.65 Hz, 8H), 8.06 (d, *J*=8.25 Hz, 4H), 7.88 (d, *J*=8.25 Hz, 4H), 7.82 – 7.84 (m, 4H), 7.79 (d, *J*=8.80 Hz, 4H), 7.65 (dd, *J*=8.71, 1.93 Hz, 4H), 7.59 – 7.60 (m, 2H), 7.58 (d, *J*=7.34 Hz, 4H), 7.48 (dd, *J*=8.62, 1.83 Hz, 8H), 7.36 (d, *J*=8.26 Hz, 8H), 1.48 (s, 24H). <sup>13</sup>C NMR (100 MHz, CDCl<sub>3</sub>) δ [ppm]: 142.59, 140.11, 138.87, 138.25, 136.49, 133.27, 131.11, 130.25, 128.34, 128.10, 126.42, 125.99, 124.20, 123.57, 123.13, 119.34, 116.23, 111.27, 109.06, 34.73, 32.04. HRMS (MALDI-TOF) *m/z*: [M]<sup>+</sup> Calcd for C<sub>128</sub>H<sub>126</sub>N<sub>6</sub>Si 1774.9813; Found 1776.242.

### III. Copies of $^1\text{H}$ and $^{13}\text{C}$ NMR for synthesized compounds

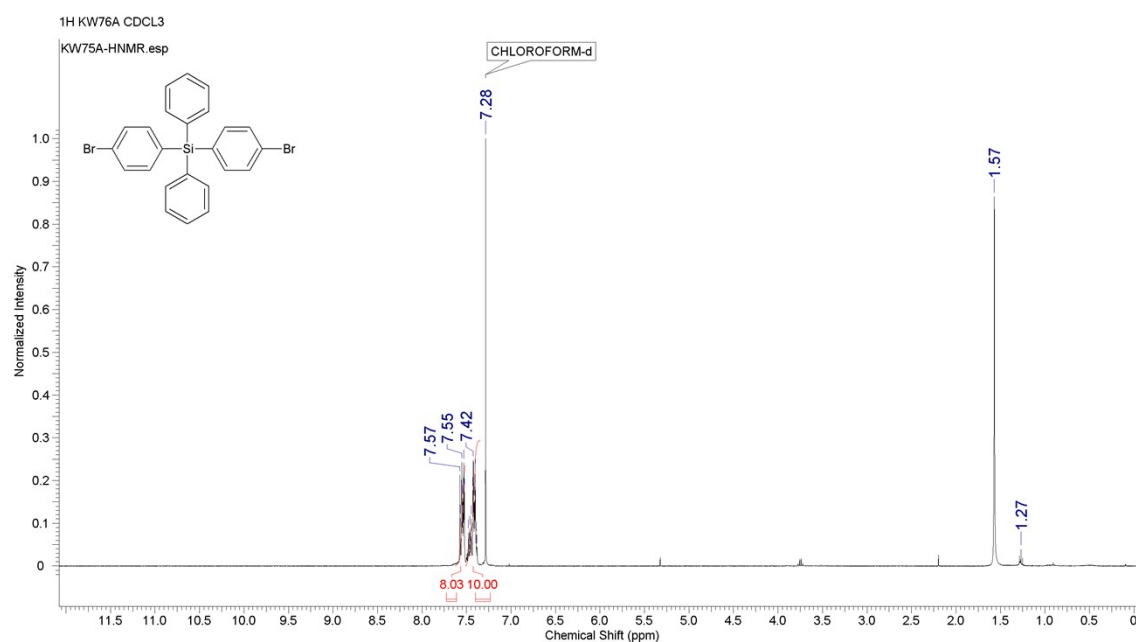

Fig. S1.  $^1\text{H}$  NMR spectrum (400 MHz) for *bis(4-bromophenyl)diphenylsilane* (Compound 1) in  $\text{CDCl}_3$ .

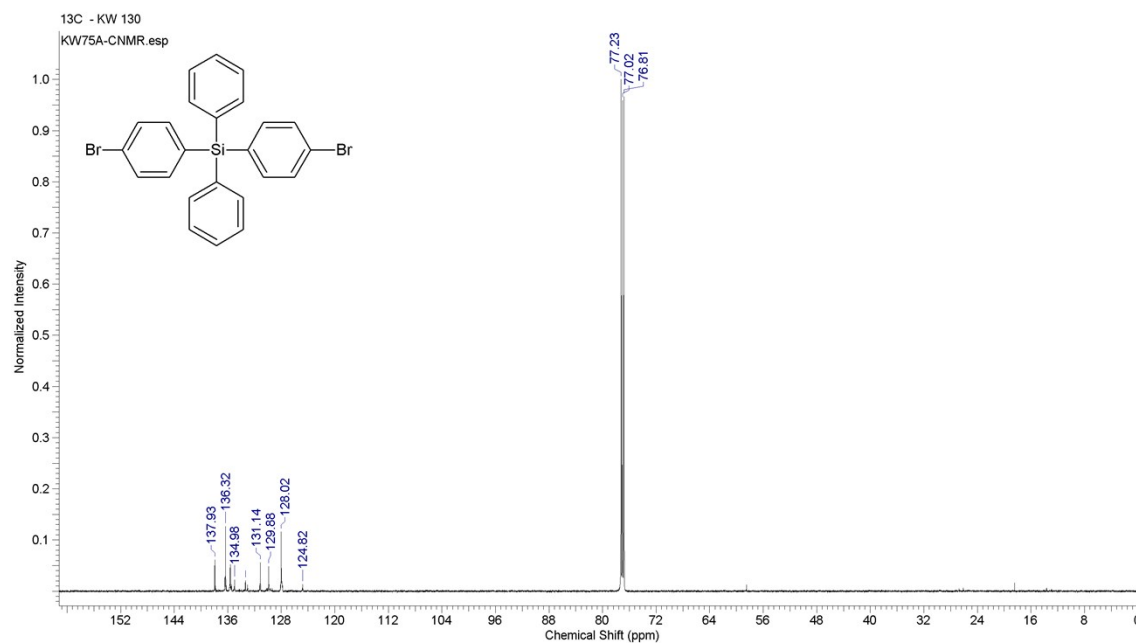

Fig. S2.  $^{13}\text{C}$  NMR spectrum (100 MHz) for *bis(4-bromophenyl)diphenylsilane* (Compound 1) in  $\text{CDCl}_3$ .

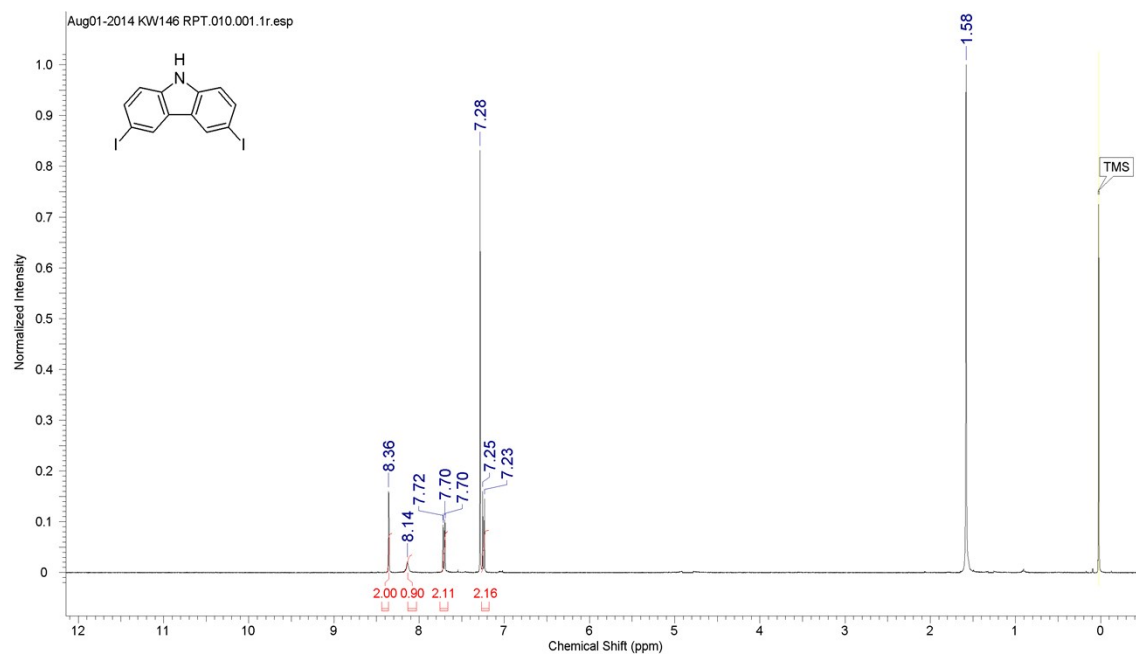

**Fig. S3.**  $^1\text{H}$  NMR spectrum (400 MHz) for 3,6-diiodocarbazole (Compound 2) in  $\text{CDCl}_3$ .

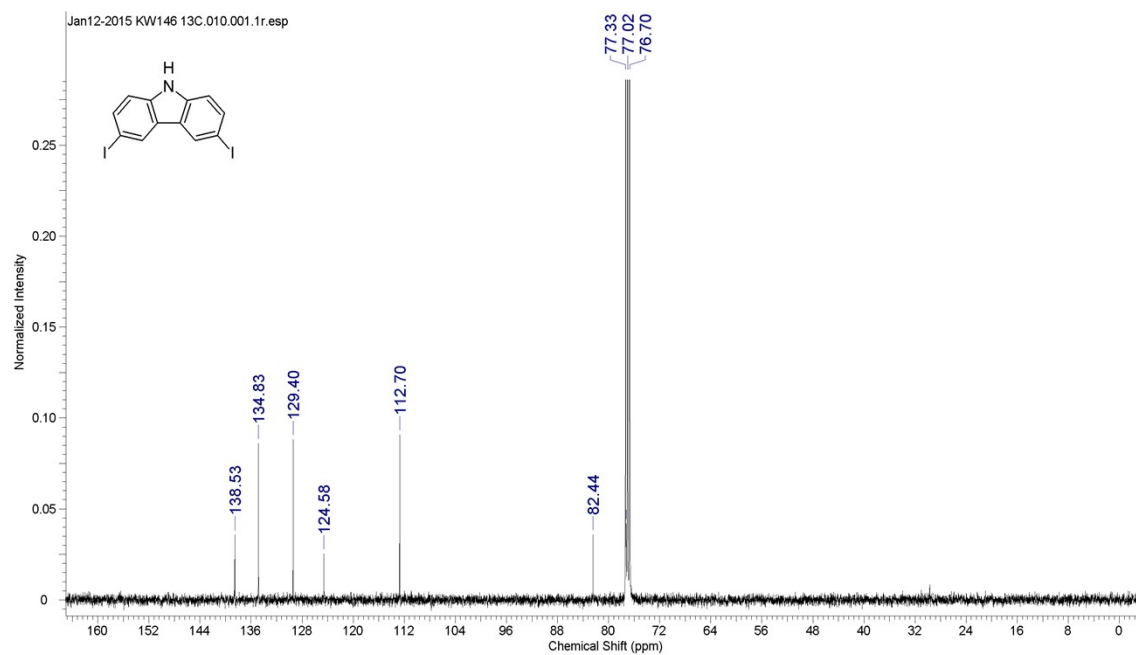

**Fig. S4.**  $^{13}\text{C}$  NMR spectrum (100 MHz) for 3,6-diiodocarbazole (Compound 2) in  $\text{CDCl}_3$ .

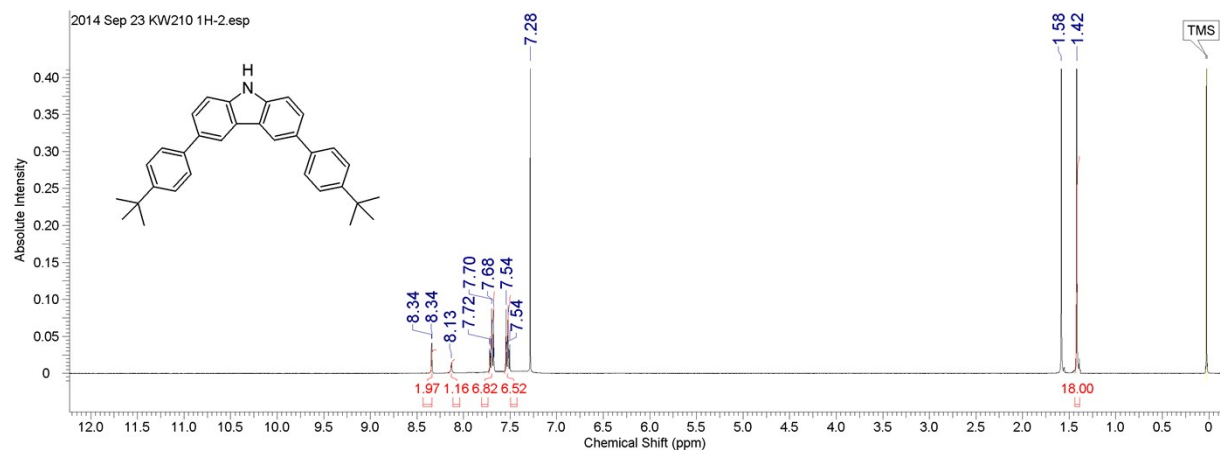

**Figure S5.**  $^1\text{H}$  NMR spectrum (400 MHz) for 3,6-bis(4-(tert-butyl)phenyl)-9H-carbazole (Compound **3**) in  $\text{CDCl}_3$ .

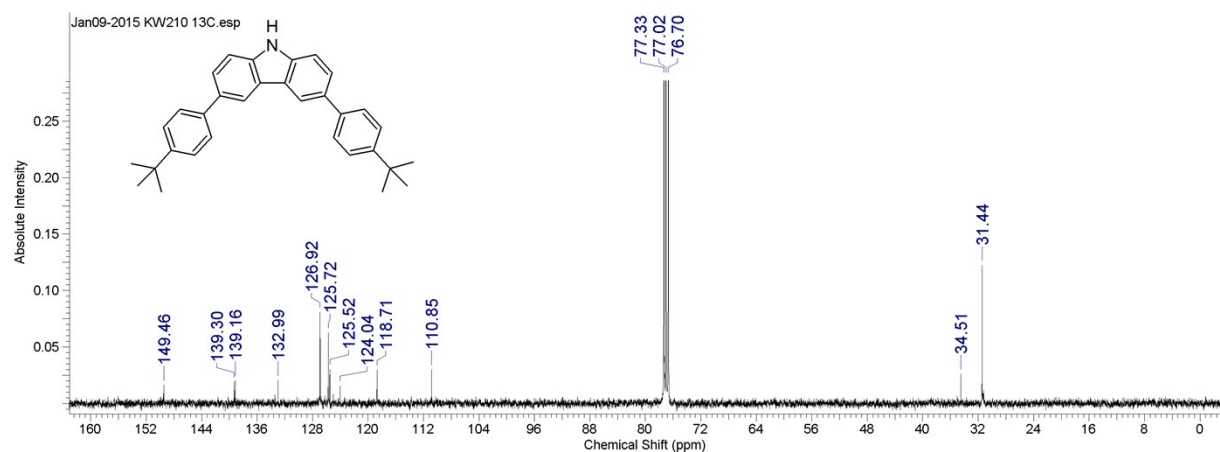

**Figure S6.**  $^{13}\text{C}$  NMR spectrum (100 MHz) for 3,6-bis(4-(tert-butyl)phenyl)-9H-carbazole (Compound **3**) in  $\text{CDCl}_3$ .

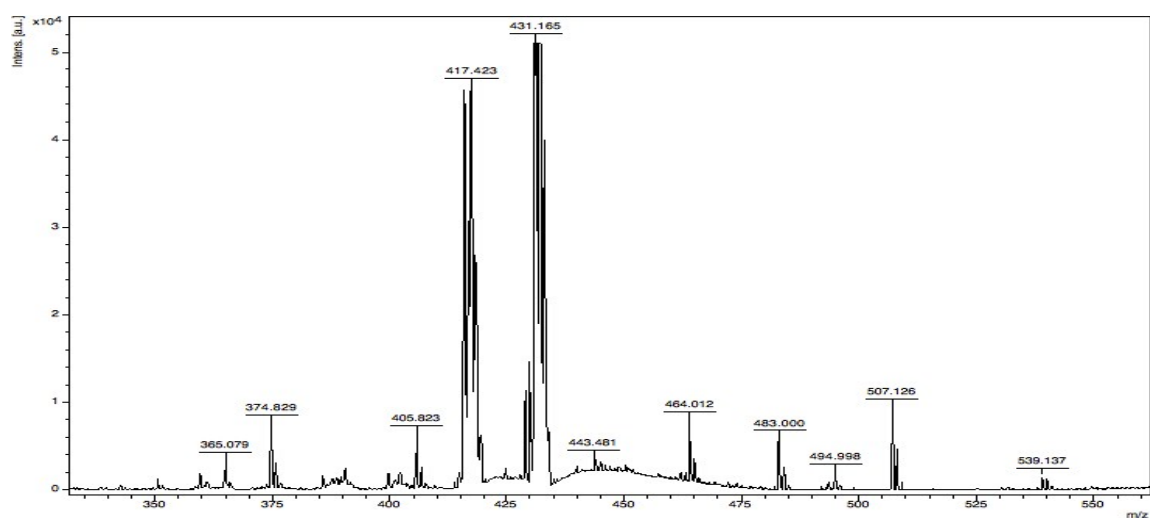

**Figure S7.** MALDI-TOF MS spectrum for 3,6-bis(4-(tert-butyl)phenyl)-9H-carbazole (Compound **3**) in  $\text{CDCl}_3$ .



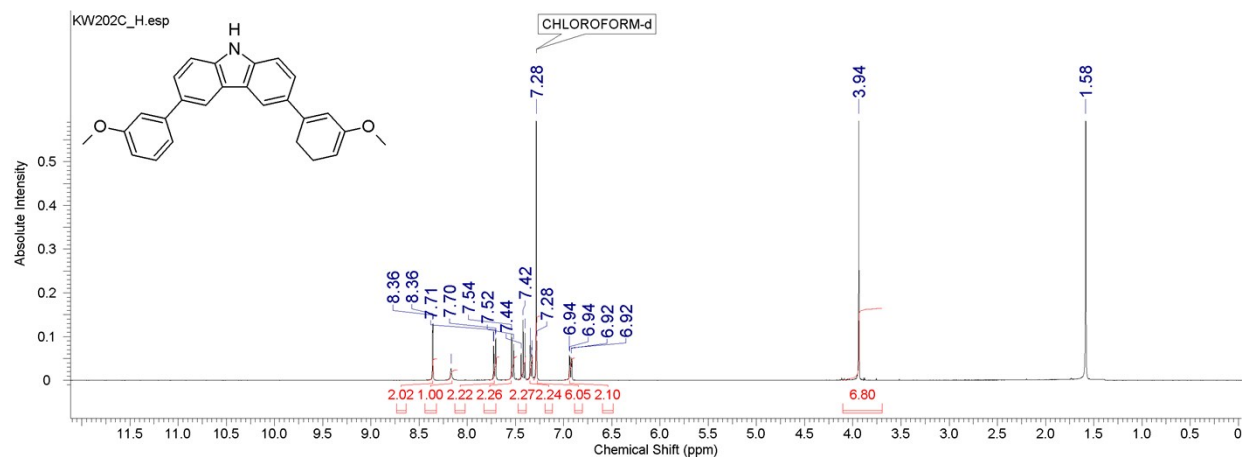

**Figure S8.** <sup>1</sup>H NMR spectrum (400 MHz) for 3,6-bis(3-methoxyphenyl)-9H-carbazole (Compound 4) in CDCl<sub>3</sub>.

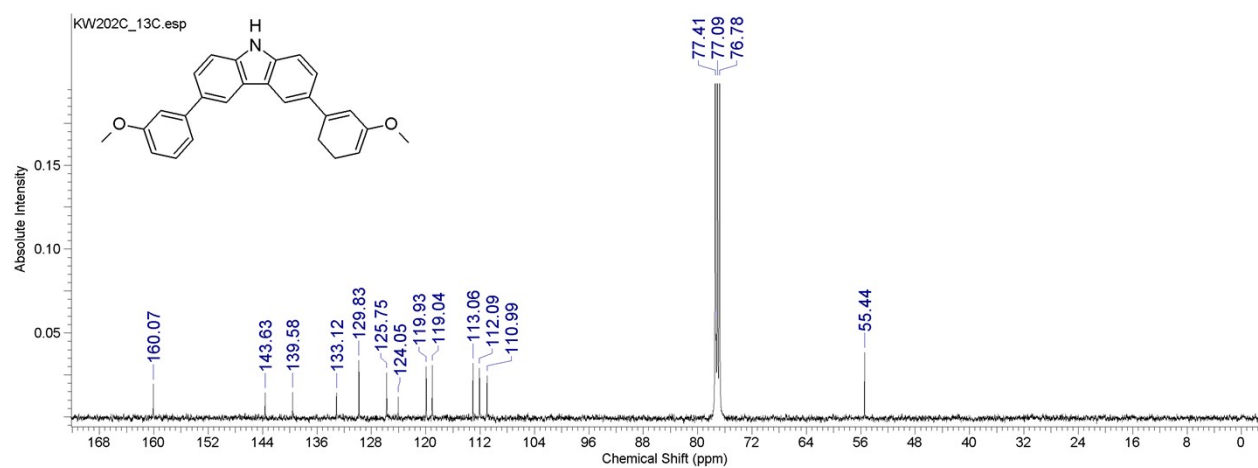

**Figure S9.** <sup>13</sup>C NMR spectrum (100 MHz) for 3,6-bis(3-methoxyphenyl)-9H-carbazole (Compound 4) in CDCl<sub>3</sub>.

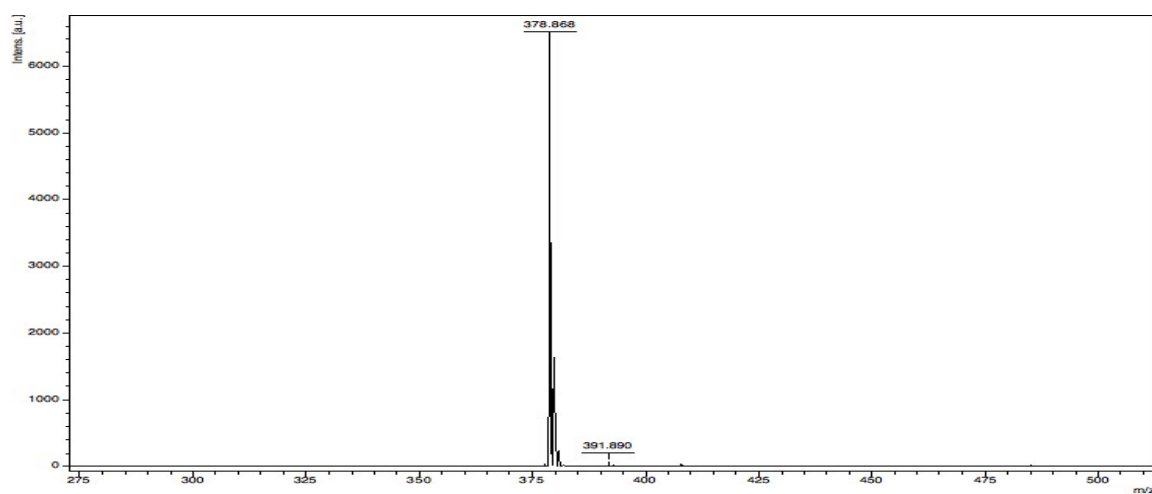

**Figure S10.** MALDI-TOF MS spectrum for 3,6-bis(3-methoxyphenyl)-9H-carbazole (Compound 4) in CDCl<sub>3</sub>.

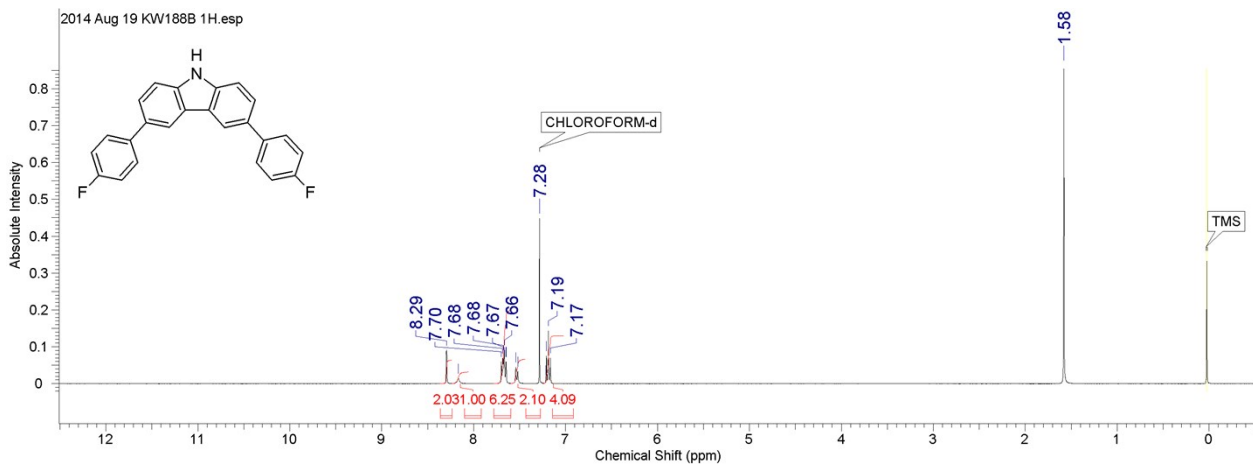

**Figure S11.**  $^1\text{H}$  NMR spectrum (400 MHz) for 3,6-bis(4-fluorophenyl)-9H-carbazole (Compound 5) in  $\text{CDCl}_3$ .

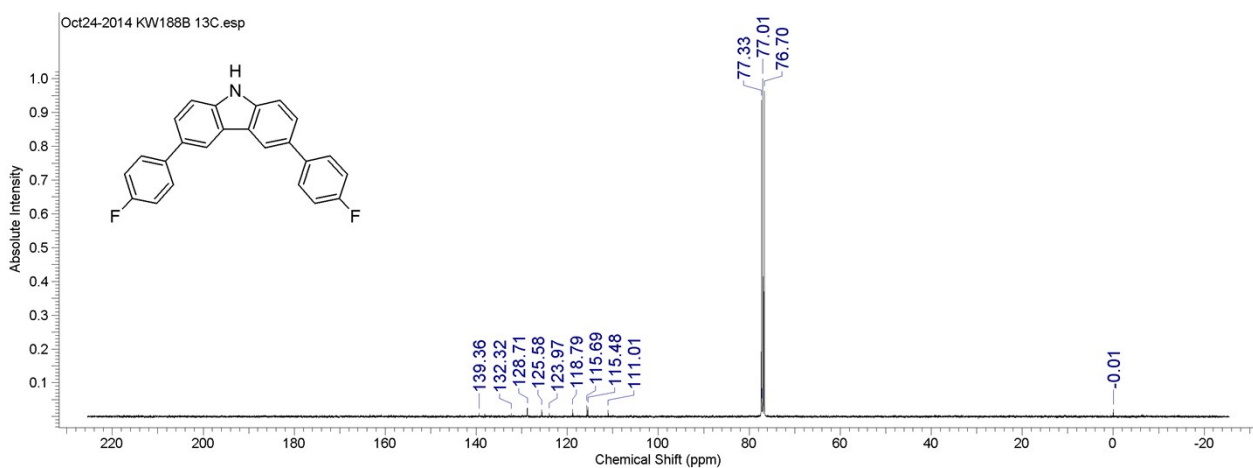

**Figure S12.**  $^{13}\text{C}$  NMR spectrum (100 MHz) for 3,6-bis(4-fluorophenyl)-9H-carbazole (Compound 5) in  $\text{CDCl}_3$ .

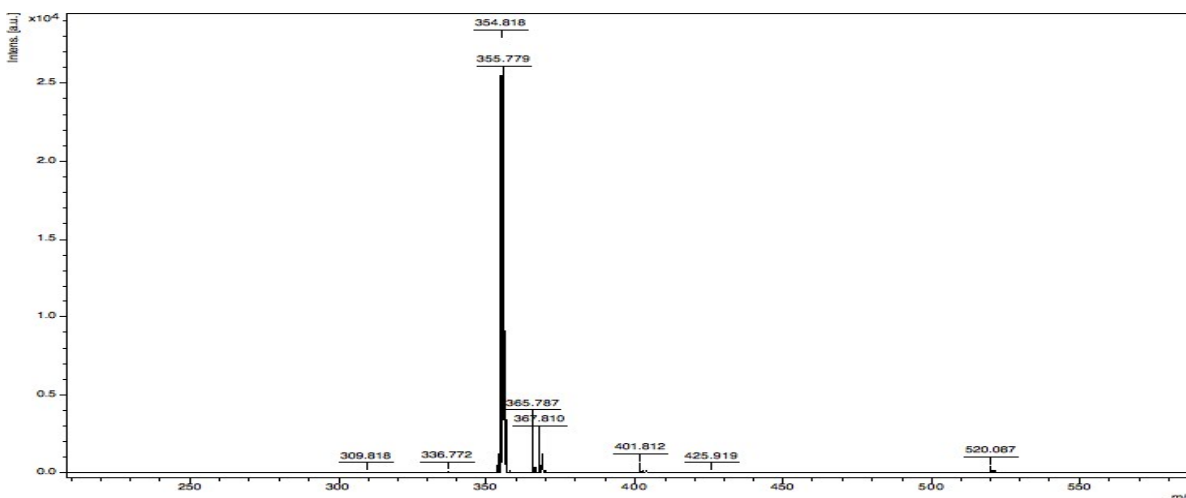

**Figure S13.** MALDI-TOF MS spectrum for 3,6-bis(4-fluorophenyl)-9H-carbazole (Compound 5) in  $\text{CDCl}_3$

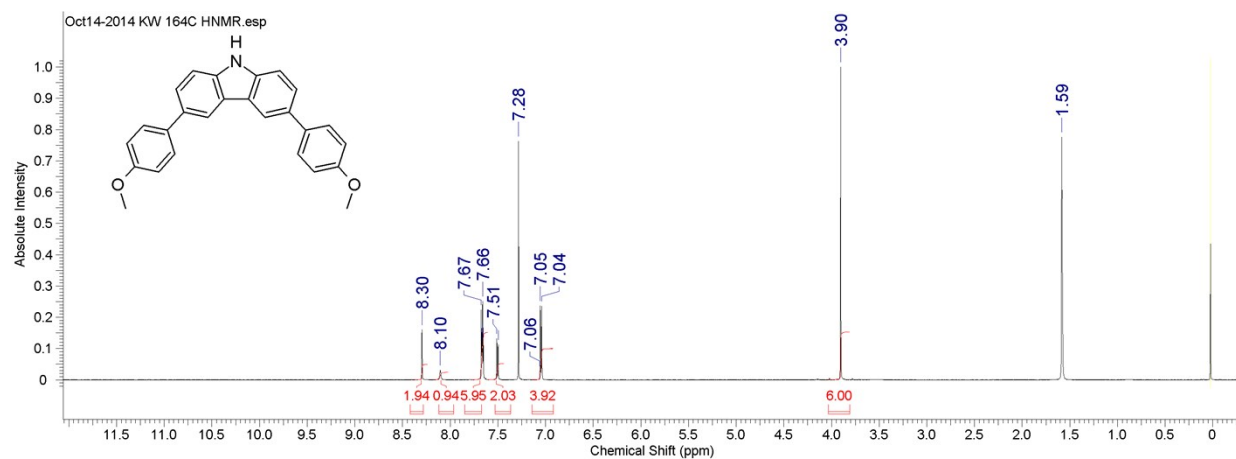

**Figure S14.**  $^1\text{H}$  NMR spectrum (600 MHz) for 3,6-bis(4-methoxyphenyl)-9H-carbazole (Compound 6)

in  $\text{CDCl}_3$ .

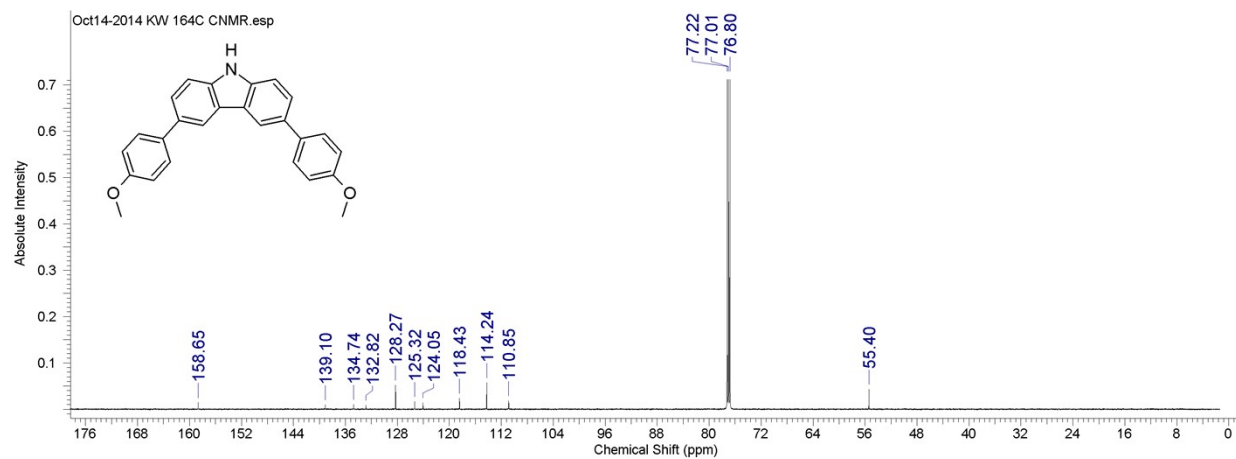

**Figure S15.**  $^{13}\text{C}$  NMR spectrum (100 MHz) for 3,6-bis(4-methoxyphenyl)-9H-carbazole (Compound 6)

in  $\text{CDCl}_3$ .

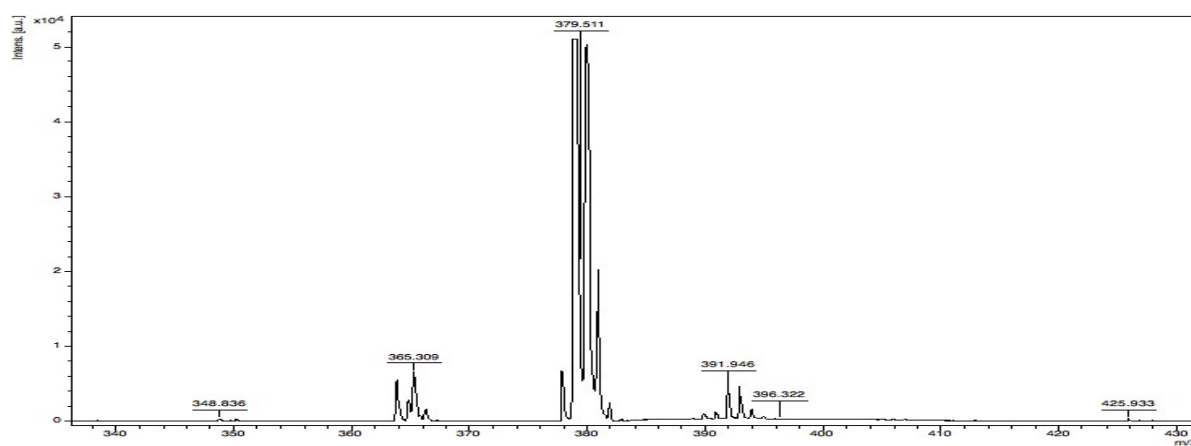

**Figure S16.** MALDI-TOF MS spectrum for 3,6-bis(4-methoxyphenyl)-9H-carbazole (Compound 6) in

$\text{CDCl}_3$ .

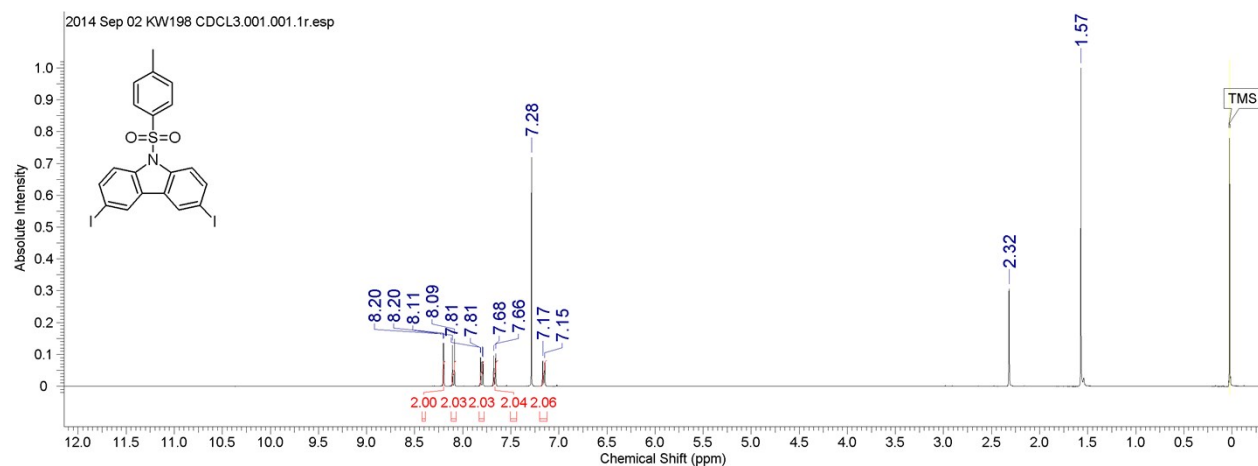

**Figure S17.**  $^1\text{H}$  NMR spectrum (400 MHz) for 3,6-diiodo-9-tosyl-9H-carbazole (Compound 8) in  $\text{CDCl}_3$ .

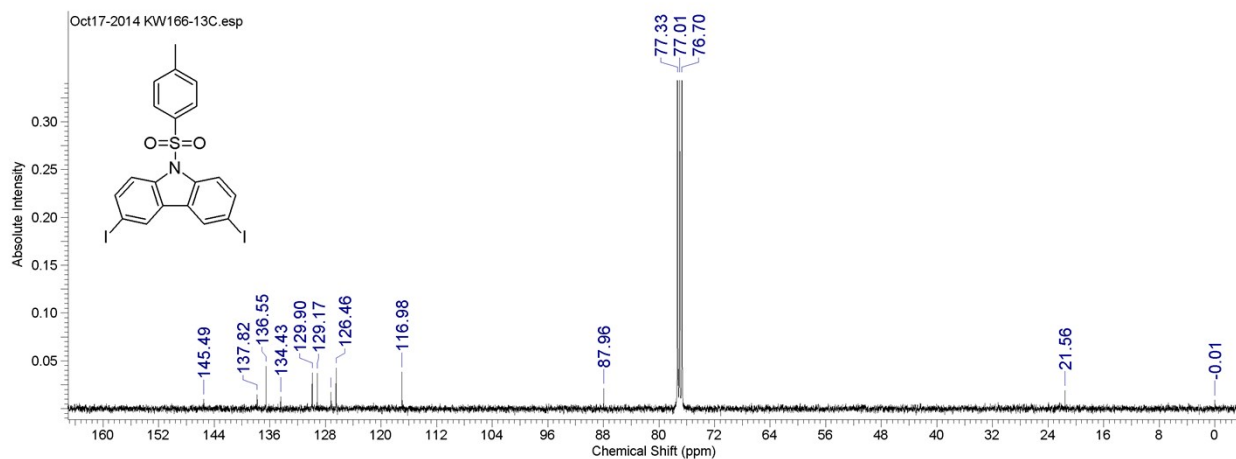

**Figure S18.**  $^{13}\text{C}$  NMR spectrum (100 MHz) for 3,6-diiodo-9-tosyl-9H-carbazole (Compound 8) in  $\text{CDCl}_3$ .

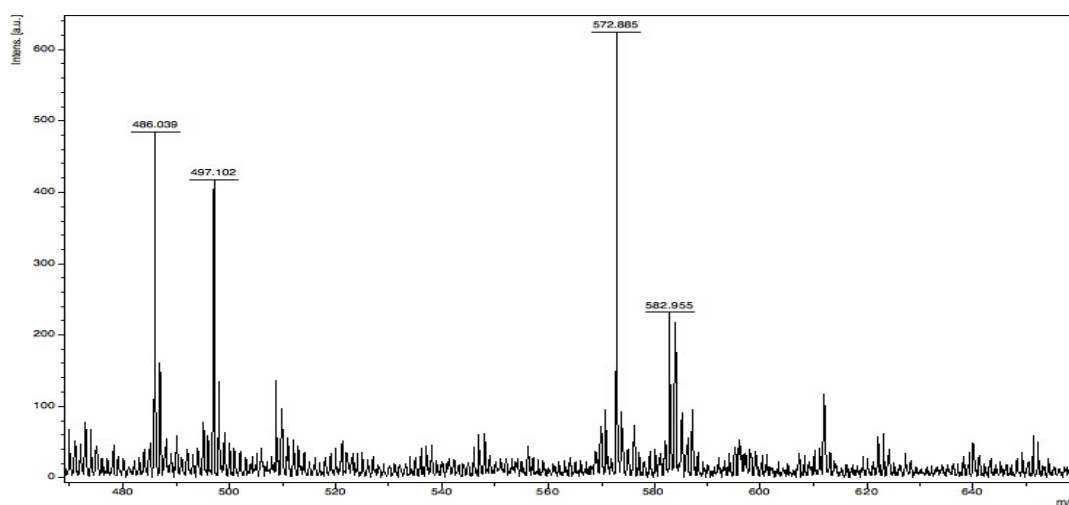

**Figure S19.** MALDI-TOF MS spectrum for 3,6-diiodo-9-tosyl-9H-carbazole (Compound 8) in  $\text{CDCl}_3$ .

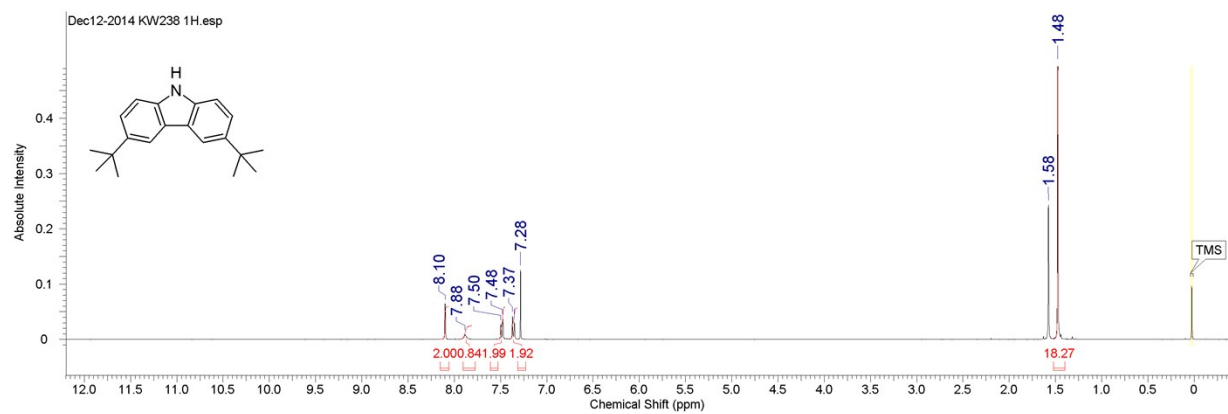

**Figure S20.**  $^1\text{H}$  NMR spectrum (400 MHz) for 3,6-di-tert-butyl-9H-carbazole (Compound 7) in  $\text{CDCl}_3$ .

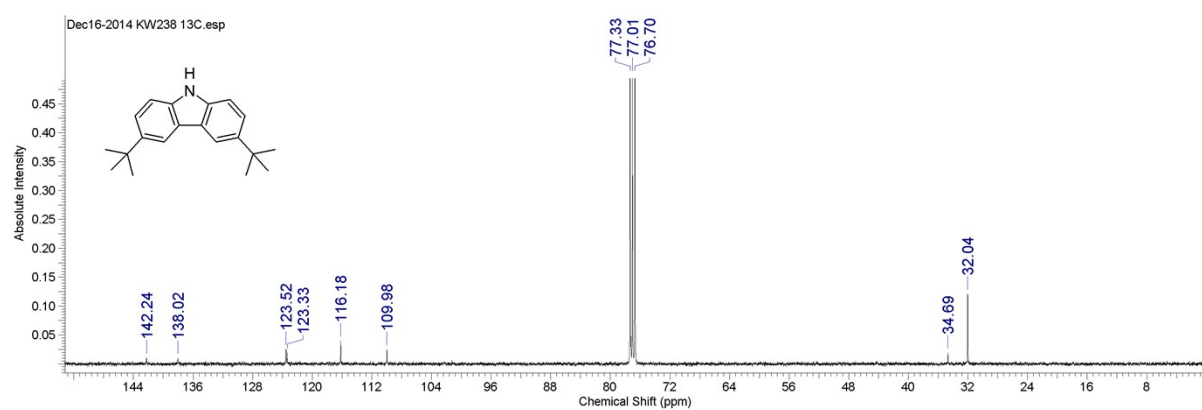

**Figure S21.**  $^{13}\text{C}$  NMR spectrum (100 MHz) for 3,6-di-tert-butyl-9H-carbazole (Compound 7) in  $\text{CDCl}_3$ .

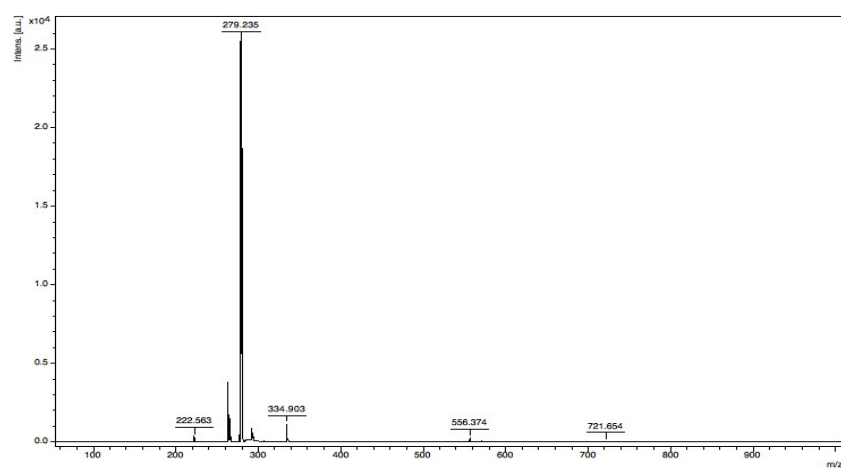

**Figure S22.** MALDI-TOF MS spectrum for 3,6-di-tert-butyl-9H-carbazole (Compound 7) in  $\text{CDCl}_3$ .

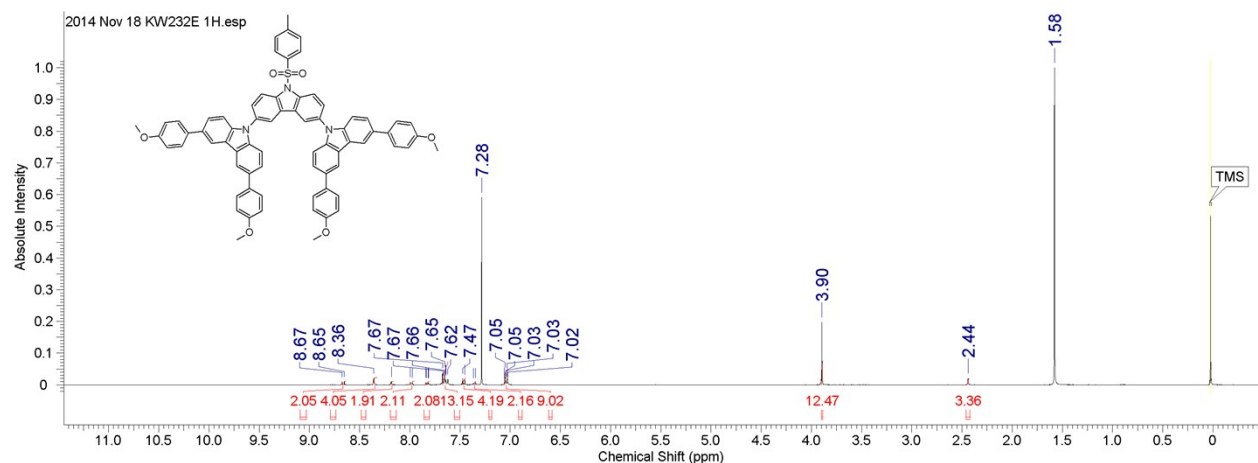

**Figure S23.**  $^1\text{H}$  NMR spectrum (400 MHz) for 3,3'',6,6''-tetrakis(4-methoxyphenyl)-9'-tosyl-9'H-9,3':6',9''-tercarbazole (Compound **9**) in  $\text{CDCl}_3$ .

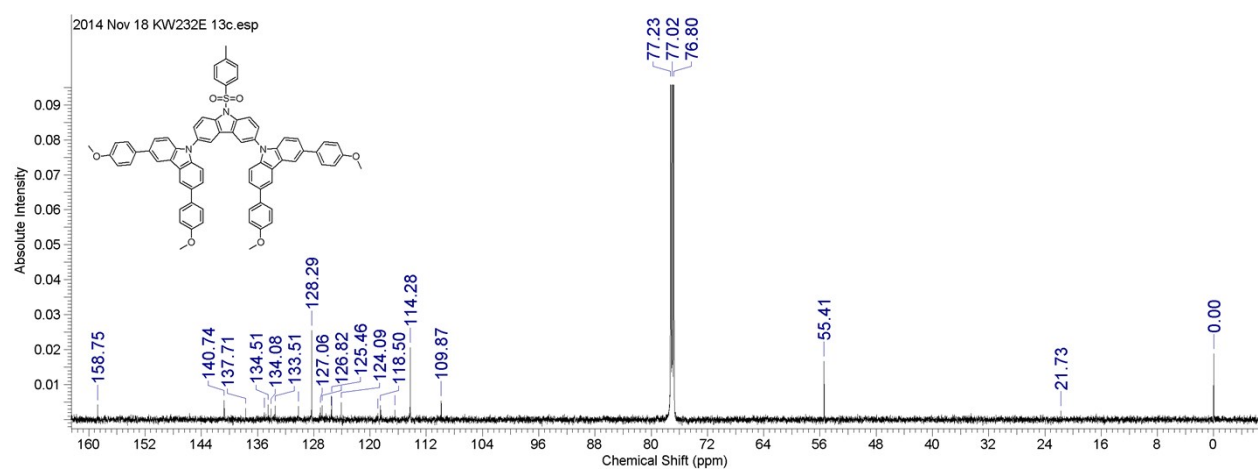

**Figure S24.**  $^{13}\text{C}$  NMR spectrum (100 MHz) for 3,3'',6,6''-tetrakis(4-methoxyphenyl)-9'-tosyl-9'H-9,3':6',9''-tercarbazole (Compound **9**) in  $\text{CDCl}_3$ .

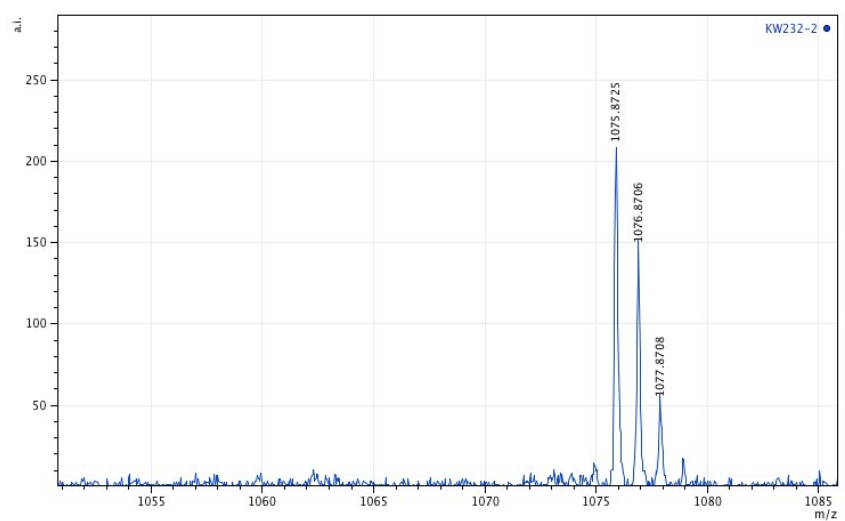

**Figure S25.** MALDI-TOF MS spectrum for 3,3'',6,6''-tetrakis(4-methoxyphenyl)-9'-tosyl-9'H-9,3':6',9''-tercarbazole (Compound **9**) in  $\text{CDCl}_3$ .

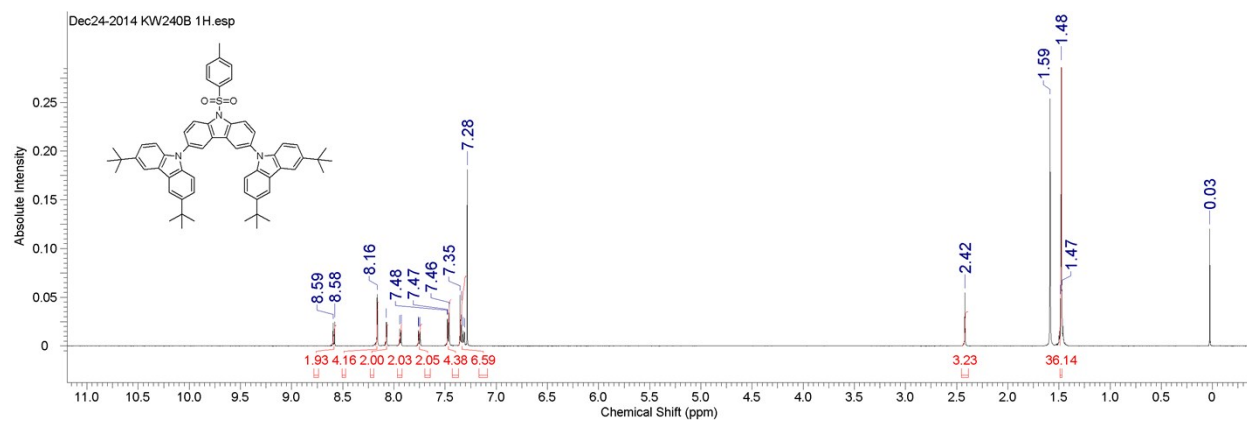

**Figure S26.**  $^1\text{H}$  NMR spectrum (600 MHz) for 3,3'',6,6''-tetra-*tert*-butyl-9'-tosyl-9'*H*-9,3':6',9''-tercarbazole (Compound **10**) in  $\text{CDCl}_3$ .

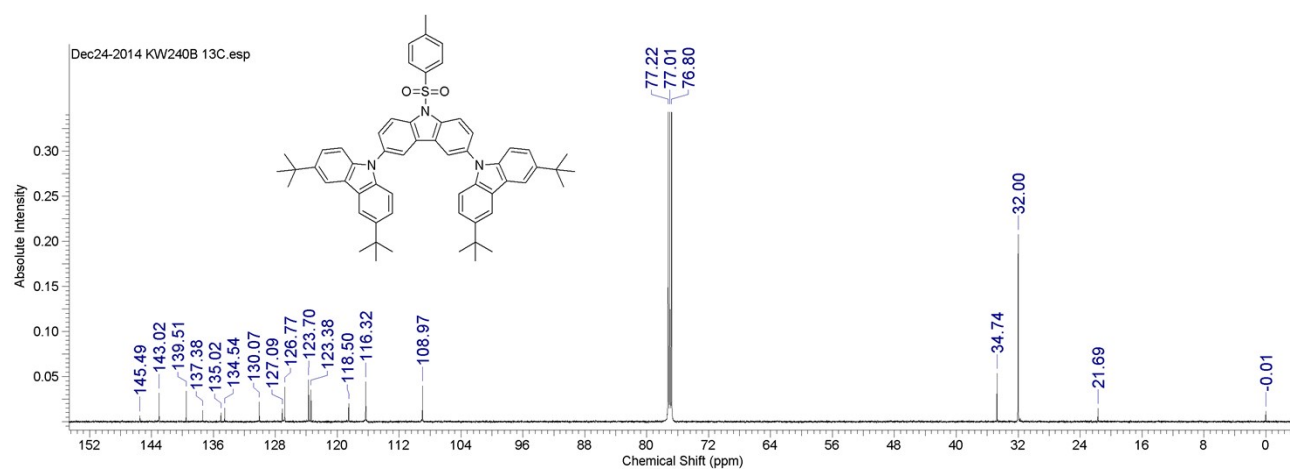

**Figure S27.**  $^{13}\text{C}$  NMR spectrum (100 MHz) for 3,3'',6,6''-tetra-*tert*-butyl-9'-tosyl-9'*H*-9,3':6',9''-tercarbazole (Compound **10**) in  $\text{CDCl}_3$ .

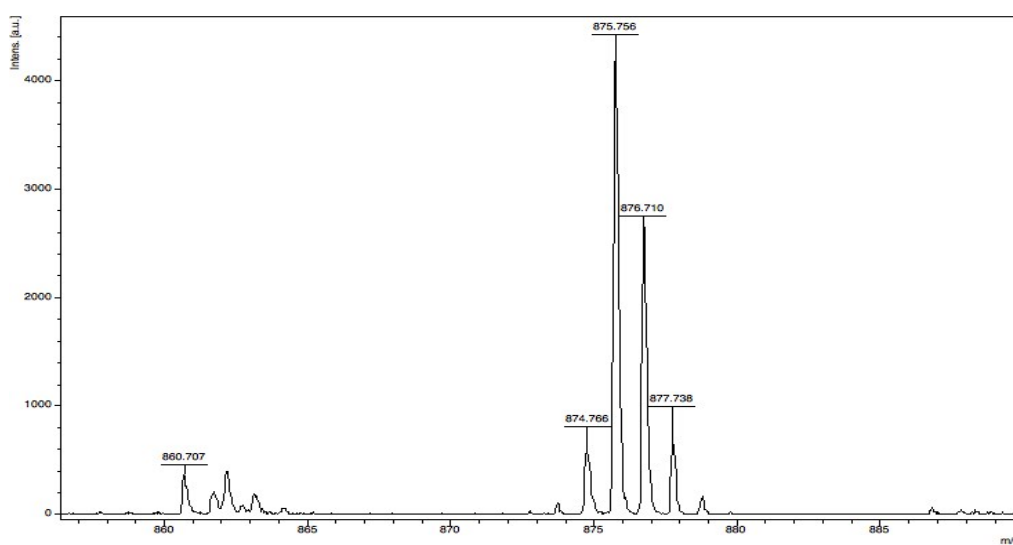

**Figure S28.** MALDI-TOF MS spectrum for 3,3'',6,6''-tetra-*tert*-butyl-9'-tosyl-9'*H*-9,3':6',9''-tercarbazole (Compound **10**) in  $\text{CDCl}_3$ .

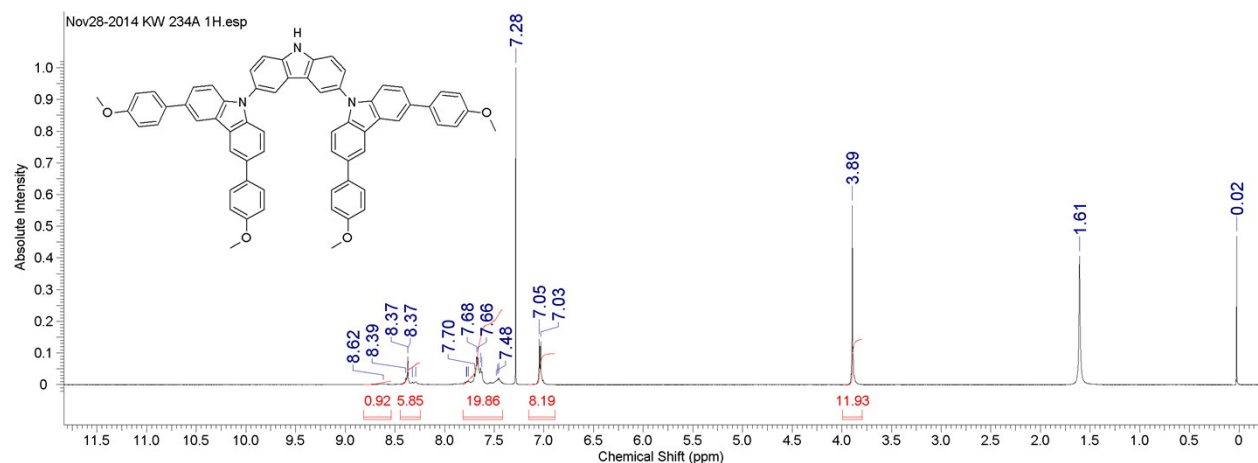

**Figure S29.**  $^1\text{H}$  NMR spectrum (600 MHz) for *3,3'',6,6''-tetrakis(4-methoxyphenyl)-9'H-9,3':6',9''-tercarbazole* (Compound 11) in  $\text{CDCl}_3$ .

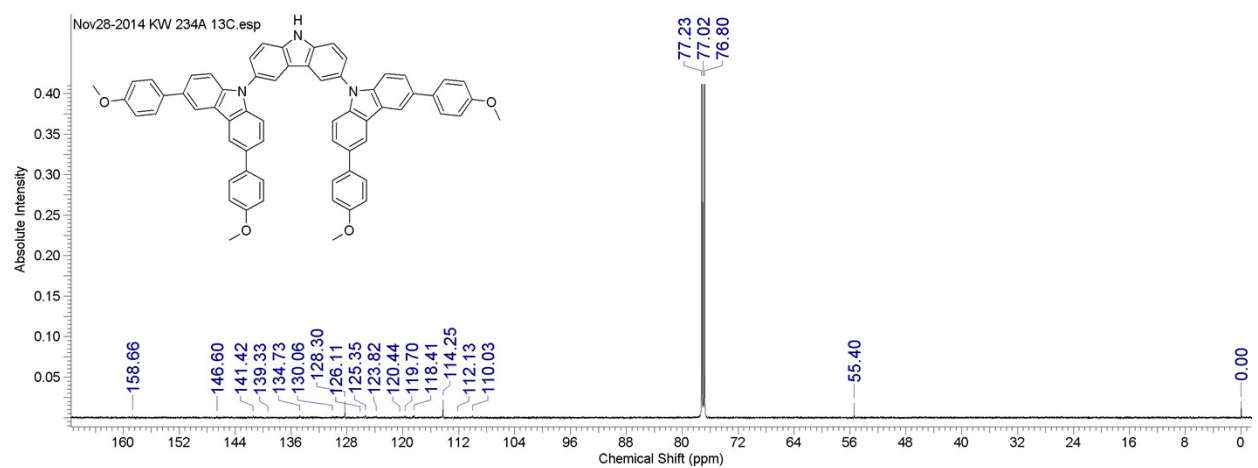

**Figure S30.**  $^{13}\text{C}$  NMR spectrum (100 MHz) for *3,3'',6,6''-tetrakis(4-methoxyphenyl)-9'H-9,3':6',9''-tercarbazole* (Compound 11) in  $\text{CDCl}_3$ .

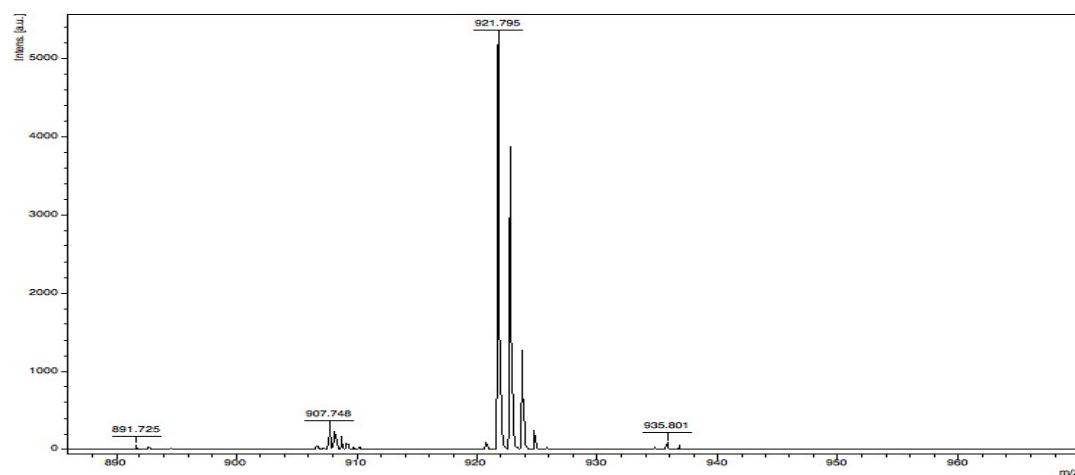

**Figure S31.** MALDI-TOF MS spectrum for *3,3'',6,6''-tetrakis(4-methoxyphenyl)-9'H-9,3':6',9''-tercarbazole* (Compound 11) in  $\text{CDCl}_3$ .



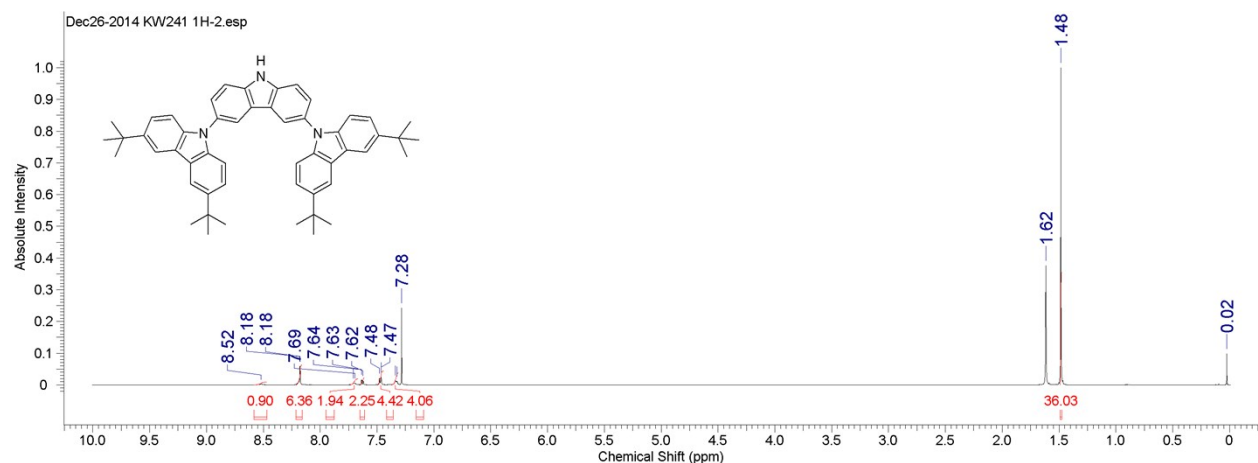

**Figure S32.**  $^1\text{H}$  NMR spectrum (600 MHz) for 3,3'',6,6''-tetra-tert-butyl-9'H-9,3':6',9''-tercarbazole (Compound 12) in  $\text{CDCl}_3$ .

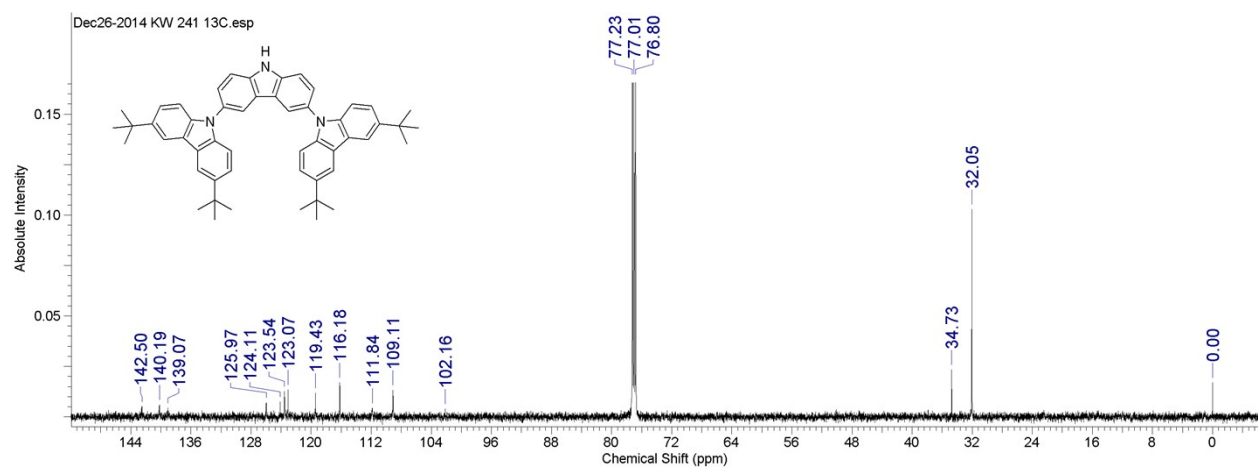

**Figure S33.**  $^{13}\text{C}$  NMR spectrum (100 MHz) for 3,3'',6,6''-tetra-tert-butyl-9'H-9,3':6',9''-tercarbazole (Compound 12) in  $\text{CDCl}_3$ .

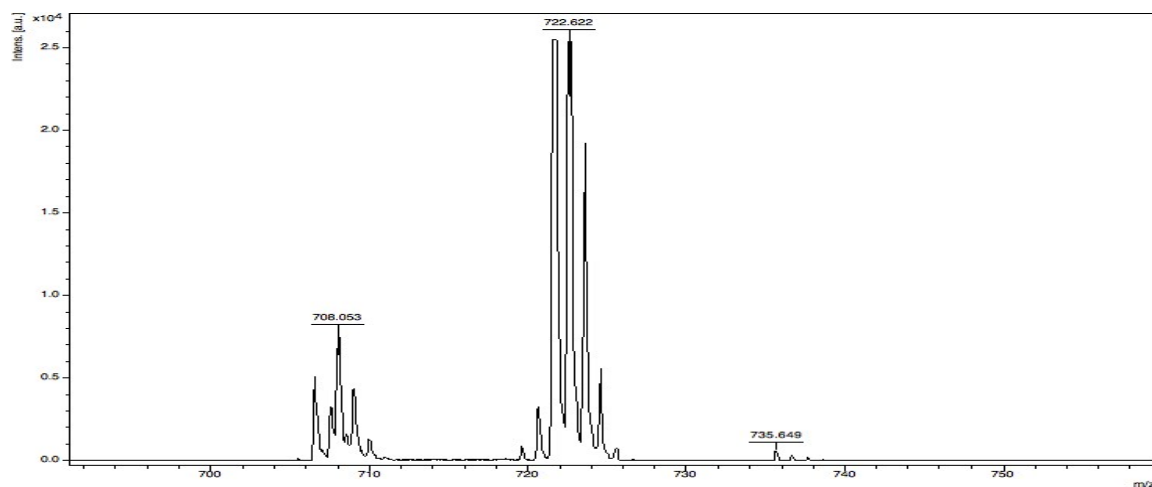

**Figure S33.** MALDI-TOF MS spectrum for 3,3'',6,6''-tetra-tert-butyl-9'H-9,3':6',9''-tercarbazole (Compound 12) in  $\text{CDCl}_3$ .

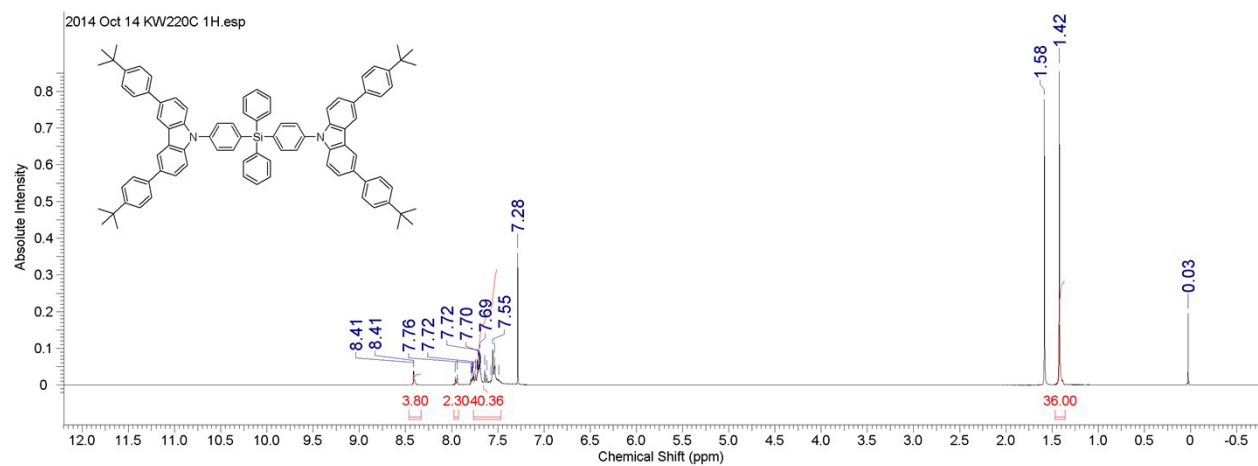

**Figure S34.**  $^1\text{H}$  NMR spectrum (400 MHz) for *bis(4-(3,6-bis(4-(tert-butyl)phenyl)-9H-carbazol-9-yl)phenyl)diphenylsilane*/**P1** in  $\text{CDCl}_3$ .

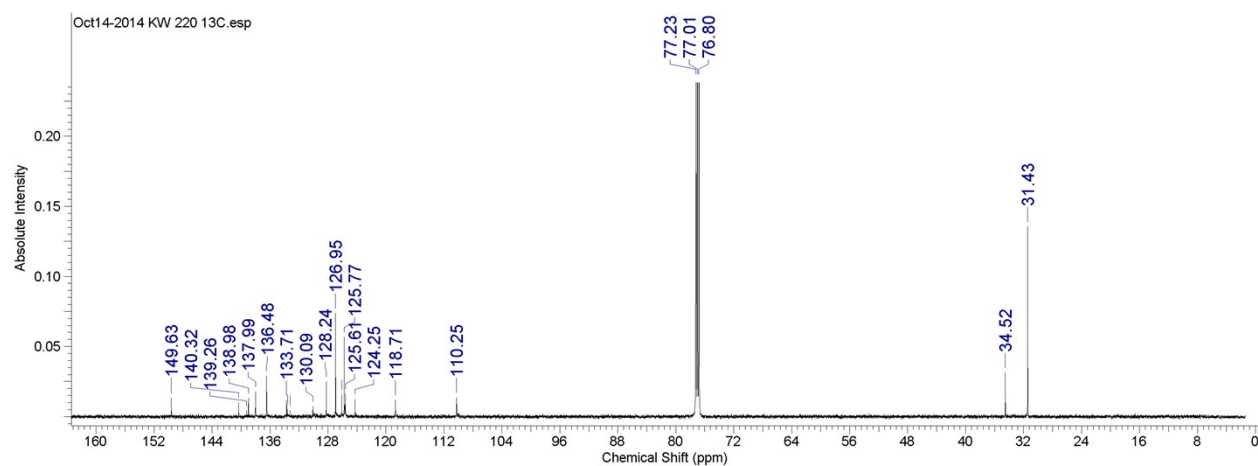

**Figure S35.**  $^{13}\text{C}$  NMR spectrum (100 MHz) for *bis(4-(3,6-bis(4-(tert-butyl)phenyl)-9H-carbazol-9-yl)phenyl)diphenylsilane*/**P1** in  $\text{CDCl}_3$ .

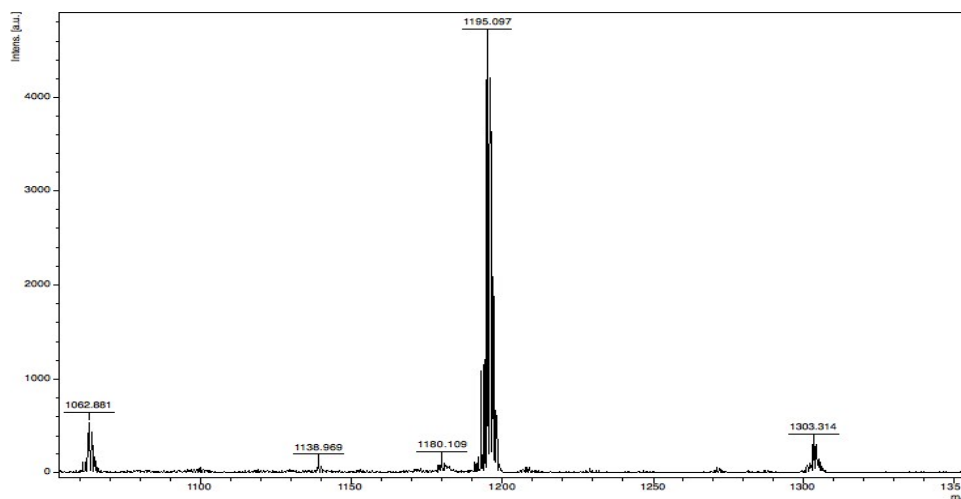

**Figure S36.** MALDI-TOF MS spectrum for *bis(4-(3,6-bis(4-(tert-butyl)phenyl)-9H-carbazol-9-yl)phenyl)diphenylsilane/P1* in  $\text{CDCl}_3$ .

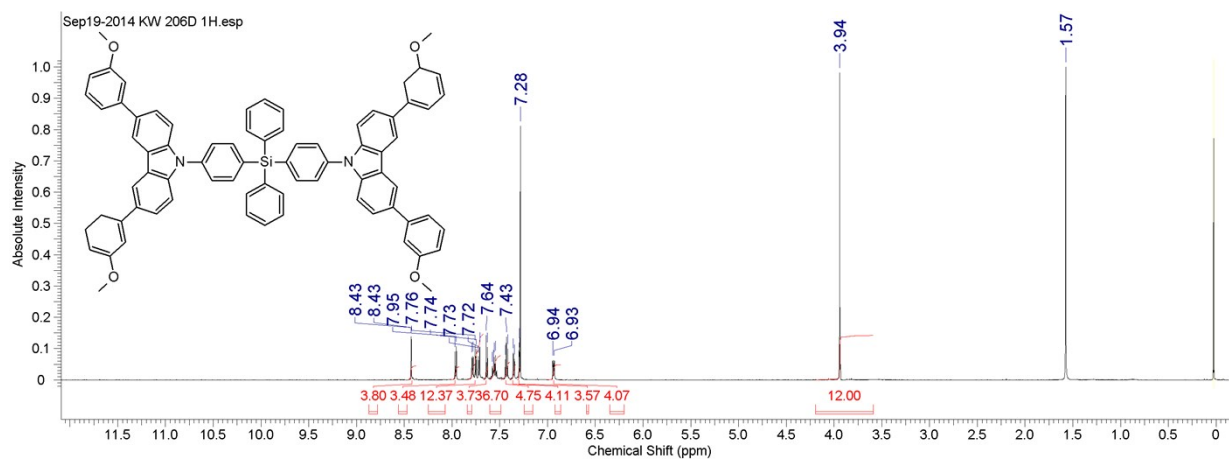

**Figure S37.**  $^1\text{H}$  NMR spectrum (600 MHz) for *bis(4-(3,6-bis(3-methoxyphenyl)-9H-carbazol-9-yl)phenyl)diphenylsilane/P2* in  $\text{CDCl}_3$ .

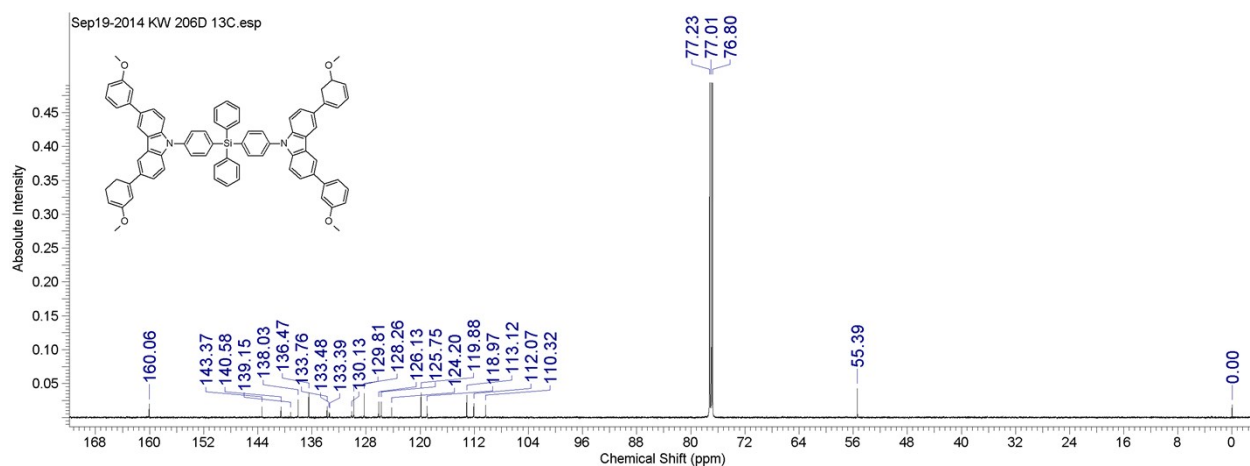

**Figure S38.**  $^{13}\text{C}$  NMR spectrum (100 MHz) for *bis(4-(3,6-bis(3-methoxyphenyl)-9H-carbazol-9-yl)phenyl)diphenylsilane/P2* in  $\text{CDCl}_3$ .

*yl)phenyl)diphenylsilane/P2* in CDCl<sub>3</sub>.

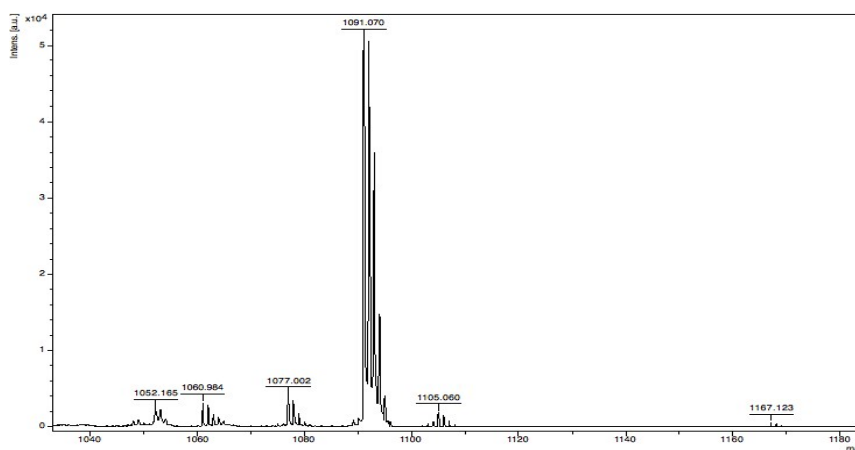

**Figure S39.** MALDI-TOF MS spectrum for *bis(4-(3,6-bis(3-methoxyphenyl)-9H-carbazol-9-yl)phenyl)diphenylsilane/P2* in CDCl<sub>3</sub>.

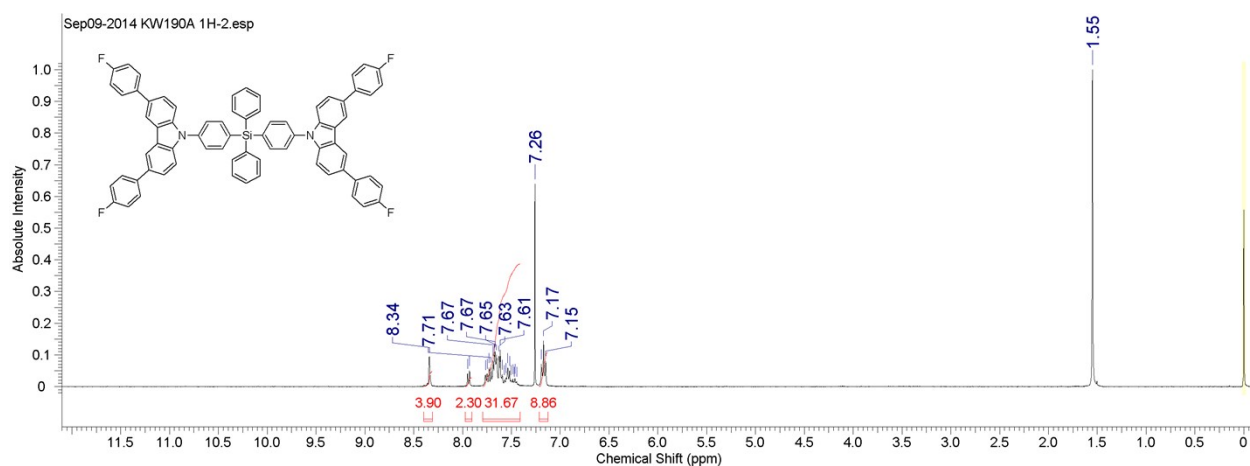

**Figure S40.** <sup>1</sup>H NMR spectrum (600 MHz) for *bis(4-(3,6-bis(4-fluorophenyl)-9H-carbazol-9-yl)phenyl)/P3* in CDCl<sub>3</sub>.

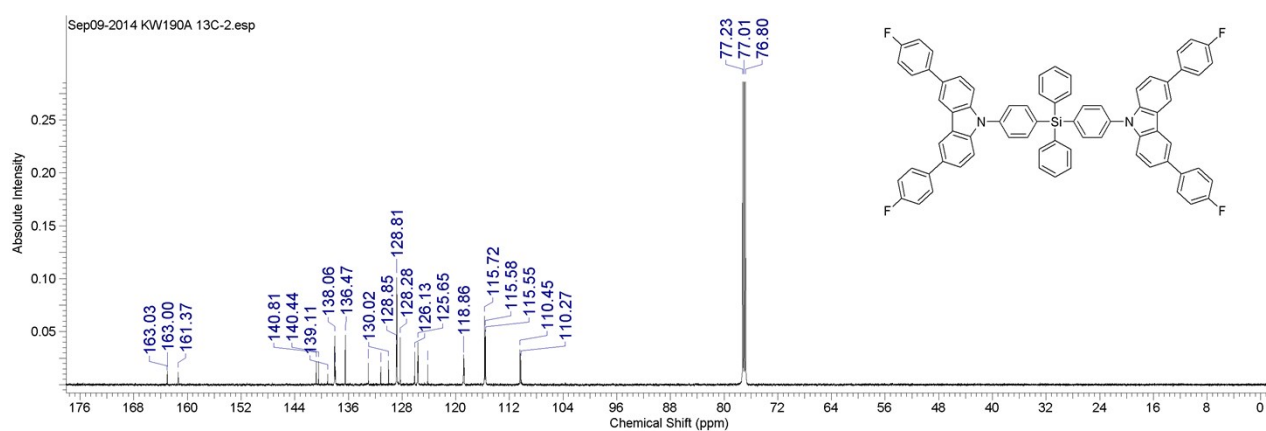

**Figure S41.** <sup>13</sup>C NMR spectrum (100 MHz) for *bis(4-(3,6-bis(4-fluorophenyl)-9H-carbazol-9-yl)phenyl)/P3* in CDCl<sub>3</sub>.

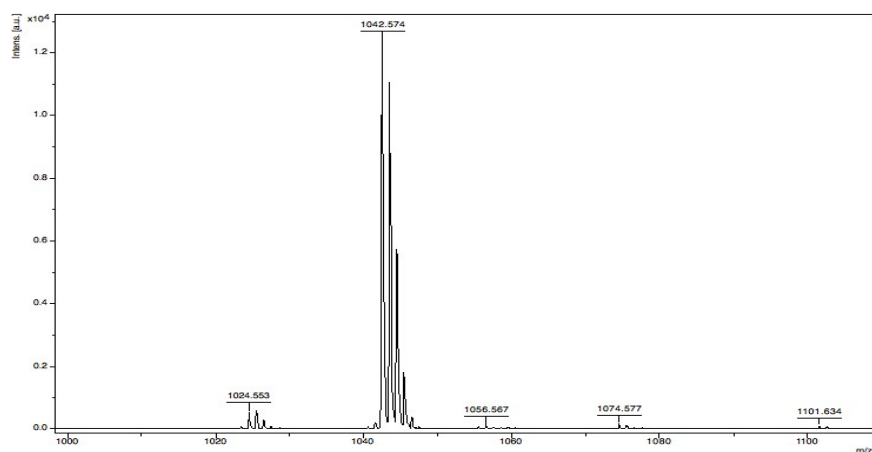

**Figure S42.** MALDI-TOF MS spectrum for *bis(4-(3,6-bis(4-fluorophenyl)-9H-carbazol-9-yl)phenyl)/P3* in  $\text{CDCl}_3$ .

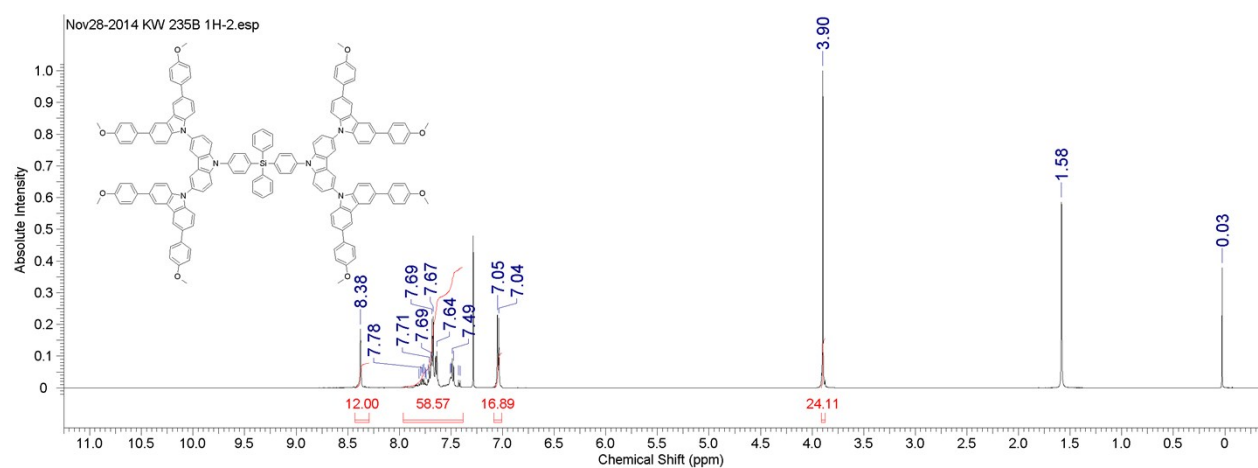

**Figure S43.**  $^1\text{H}$  NMR spectrum (600 MHz) for *diphenylbis(4-(3,3'',6,6''-tetrakis(4-methoxyphenyl)-9'H-[9,3':6',9''-tercarbazol]-9'-yl)phenyl)silane/P4* in  $\text{CDCl}_3$ .

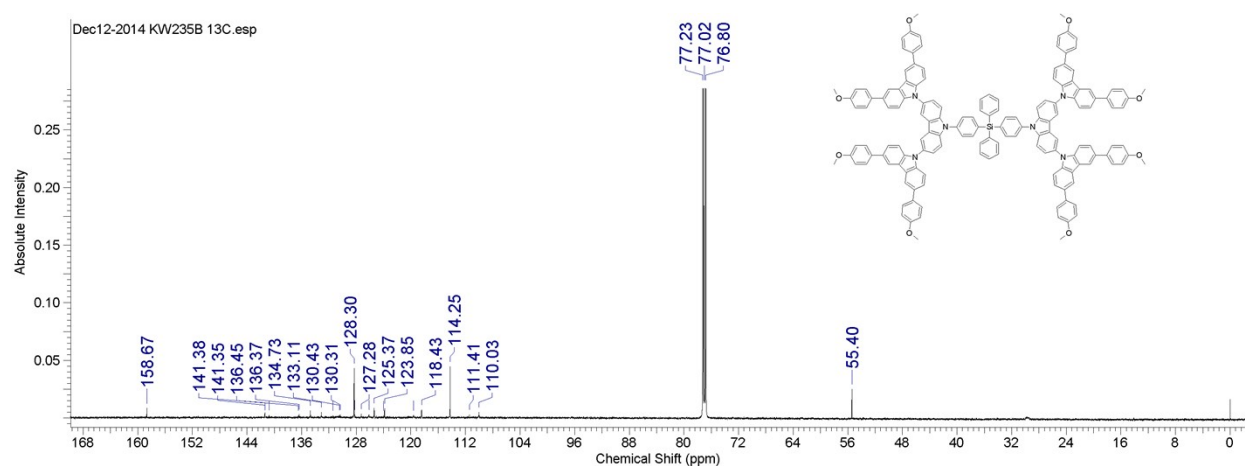

**Figure S44.**  $^{13}\text{C}$  NMR spectrum (100 MHz) for *diphenylbis(4-(3,3'',6,6''-tetrakis(4-methoxyphenyl)-9'H-[9,3':6',9''-tercarbazol]-9'-yl)phenyl)silane/P4* in  $\text{CDCl}_3$ .

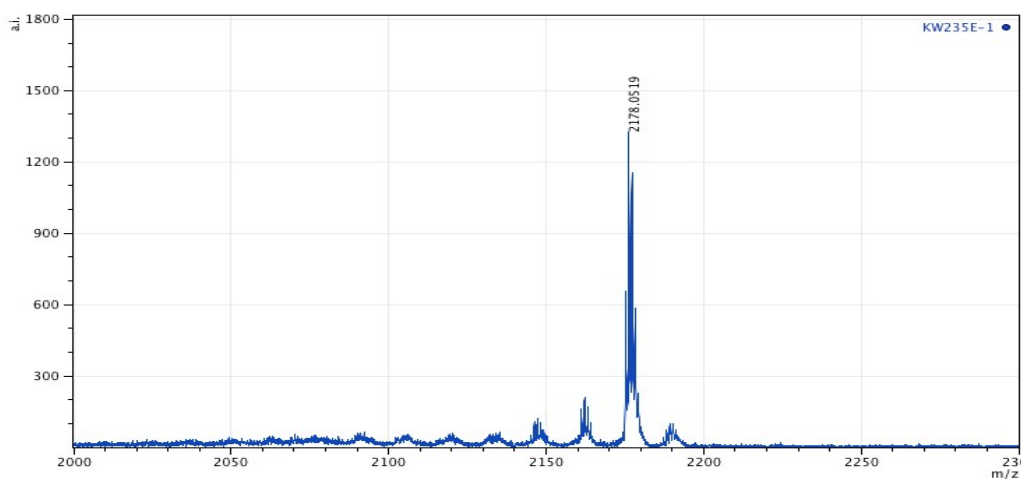

**Figure S45.** MALDI-TOF MS spectrum for *diphenylbis(4-(3,3'',6,6''-tetrakis(4-methoxyphenyl)-9'H-[9,3':6',9''-tercarbazol]-9'-yl)phenyl)silane/P4* in  $\text{CDCl}_3$ .

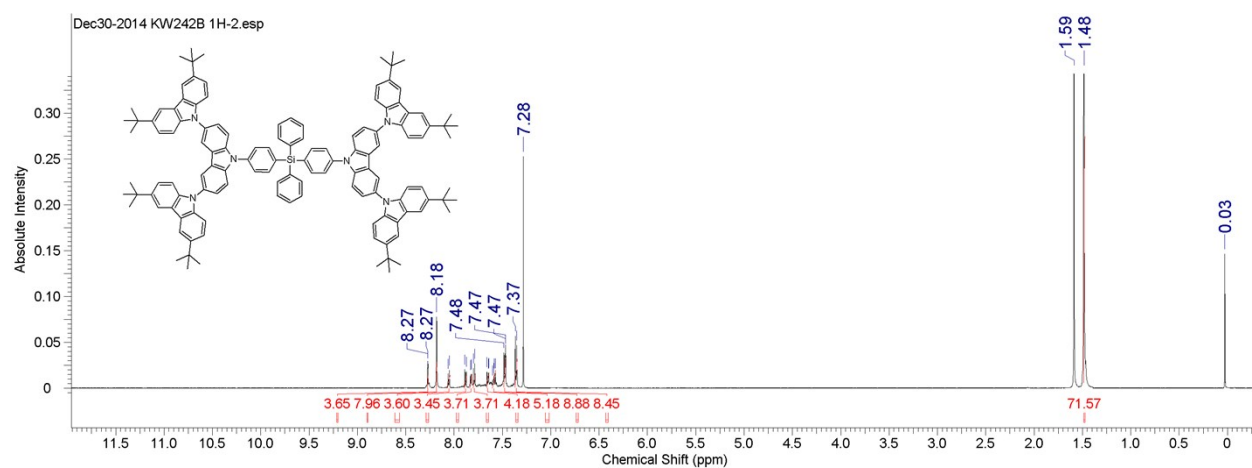

**Figure S46.**  $^1\text{H}$  NMR spectrum (600 MHz) for *diphenylbis(4-(3,3'',6,6''-tetra-tert-butyl-9'H-[9,3':6',9''-tercarbazol]-9'-yl)phenyl)silane/P5* in  $\text{CDCl}_3$ .

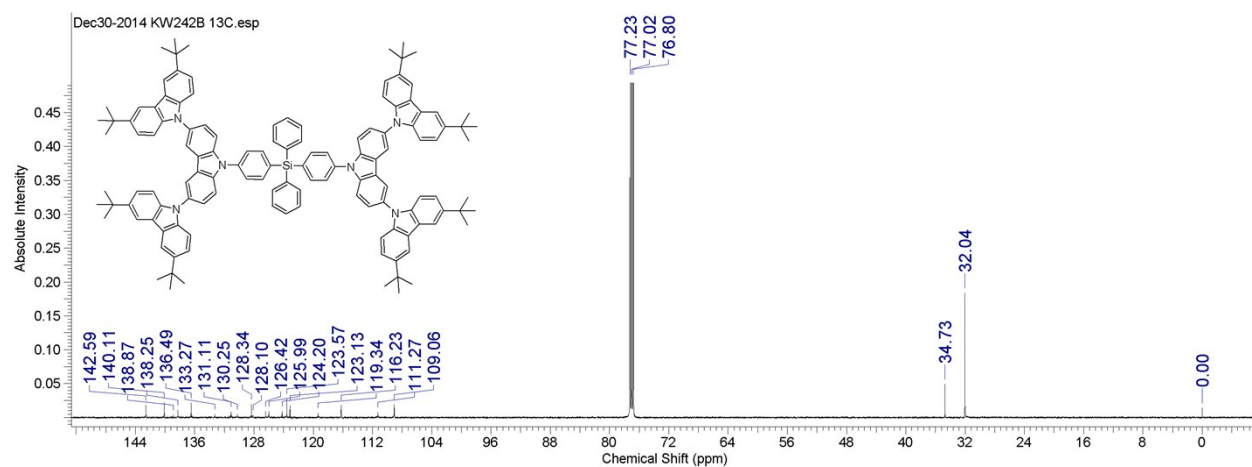

**Figure S47.**  $^{13}\text{C}$  NMR spectrum (100 MHz) for *diphenylbis(4-(3,3'',6,6''-tetra-tert-butyl-9'H-[9,3':6',9''-tercarbazol]-9'-yl)phenyl)silane/P5* in  $\text{CDCl}_3$ .

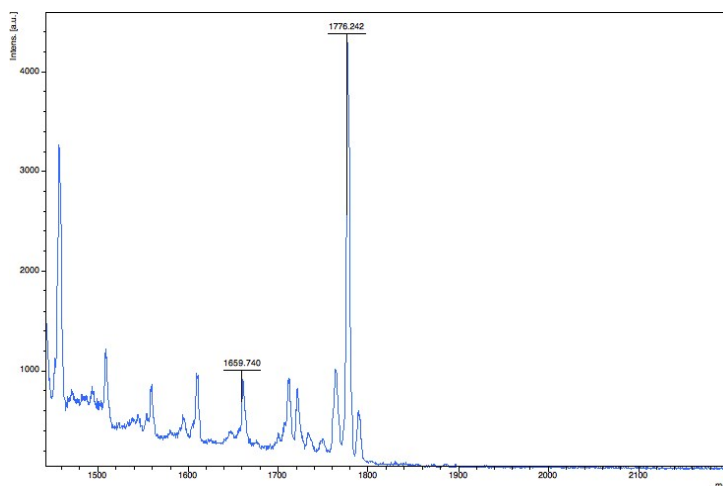

**Figure S48.** MALDI-TOF MS spectrum for *diphenylbis(4-(3,3'',6,6''-tetra-tert-butyl-9'H-[9,3':6',9''-tercarbazol]-9'-yl)phenyl)silane/P5* in  $\text{CDCl}_3$ .

## Reference

1. El-Khouly, M. E.; Lee, S.-H.; Kay, K.-Y.; Fukuzumi, S. *New Journal of Chemistry* **2013**, *37*, 3252.

#### IV . Torsional angle

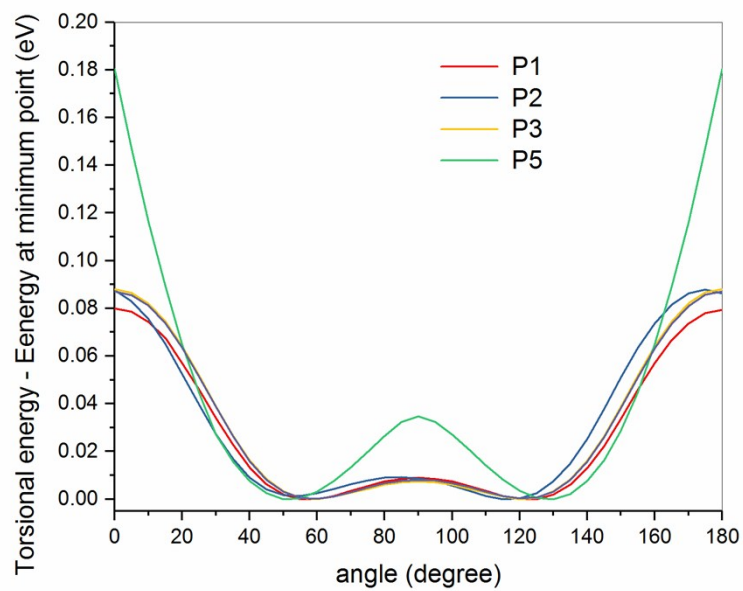

Figure S49 : Torsional angle between the carbazole and moiety at the 3,6 positions of the carbazole.  
The data is subtracted with its minimum torsional energy for ease of comparison.



I. Coordinates of Stationary Points in xyz format

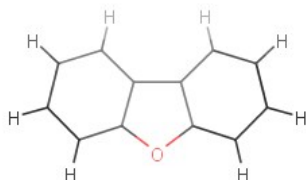

CarbO  
21

|   |               |               |               |
|---|---------------|---------------|---------------|
| C | 2.4174015544  | -1.2477672402 | 0.0002880996  |
| C | 3.3967538808  | -0.2553950268 | 0.0003348679  |
| C | 3.0557373885  | 1.1057552109  | 0.0001909291  |
| C | 1.7243864723  | 1.5113887993  | 0.0000102255  |
| C | 0.7257168804  | 0.5330082923  | -0.0000046862 |
| C | 1.0990879868  | -0.8218164867 | 0.0001226625  |
| C | -0.7257162672 | 0.5330133265  | -0.0000047035 |
| C | -1.0990934929 | -0.8218227179 | 0.0001226359  |
| O | 0.0000015300  | -1.6498189807 | 0.0001542002  |
| C | -1.7243921532 | 1.5113830032  | 0.0000102925  |
| C | -3.0557313321 | 1.1057589467  | 0.0001911045  |
| C | -3.3967556816 | -0.2554006217 | 0.0003350425  |
| C | -2.4173969642 | -1.2477633266 | 0.0002881364  |
| H | 2.6661686001  | -2.3013337485 | 0.0004140595  |
| H | 4.4418811640  | -0.5419697100 | 0.0005091865  |
| H | 3.8429425344  | 1.8505250369  | 0.0002451754  |
| H | 1.4705672842  | 2.5651176518  | -0.0000881987 |
| H | -1.4705665836 | 2.5651190309  | -0.0000881201 |
| H | -3.8429439162 | 1.8505236491  | 0.0002454528  |
| H | -4.4418794246 | -0.5419693473 | 0.0005095350  |
| H | -2.6661694291 | -2.3013358719 | 0.0004141028  |

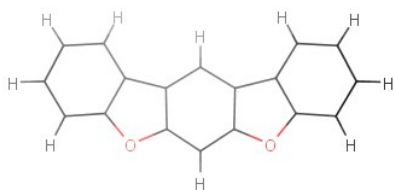

Carb20

30

|   |               |               |               |
|---|---------------|---------------|---------------|
| C | -4.6760101038 | -0.7398009038 | 0.0000116599  |
| C | -5.3857331947 | 0.4609247901  | -0.0000149854 |
| C | -4.7236854432 | 1.6971989002  | -0.0002402856 |
| C | -3.3331724545 | 1.7672150125  | -0.0004281545 |
| C | -2.6021187067 | 0.5760765411  | -0.0003728671 |
| C | -3.2948636631 | -0.6455615821 | -0.0001731532 |
| C | -1.1923153522 | 0.2266735917  | -0.0003794225 |
| C | -1.1608095122 | -1.1877429267 | -0.0002055218 |
| O | -2.4279645941 | -1.7170932831 | -0.0001139631 |
| C | 0.0000379852  | 0.9505672481  | -0.0003698290 |
| C | 1.1923549651  | 0.2266270264  | -0.0001566940 |
| C | 1.1607947445  | -1.1877838920 | -0.0000167369 |
| C | -0.0000173338 | -1.9450459772 | -0.0000428919 |
| C | 2.6021718075  | 0.5759729592  | 0.0001284148  |
| C | 3.2948643517  | -0.6456848506 | 0.0004043788  |
| O | 2.4279275534  | -1.7171828493 | 0.0002727643  |
| C | 3.3332658502  | 1.7670853454  | 0.0002869771  |
| C | 4.7237860401  | 1.6970176811  | 0.0007118081  |
| C | 5.3857832489  | 0.4607154376  | 0.0009879154  |
| C | 4.6760100118  | -0.7399848487 | 0.0008413584  |
| H | -5.1730887346 | -1.7014539051 | 0.0001918896  |
| H | -6.4690086441 | 0.4357989243  | 0.0001522601  |
| H | -5.3054028888 | 2.6114103799  | -0.0002536294 |
| H | -2.8316457558 | 2.7282053359  | -0.0005975246 |
| H | 0.0000526431  | 2.0339695347  | -0.0004602261 |
| H | -0.0000425501 | -3.0261207550 | 0.0001317155  |
| H | 2.8317848404  | 2.7280972841  | 0.0001192991  |
| H | 5.3055365776  | 2.6112048362  | 0.0008522891  |
| H | 6.4690567243  | 0.4355474232  | 0.0013420913  |
| H | 5.1730517641  | -1.7016528178 | 0.0010910625  |

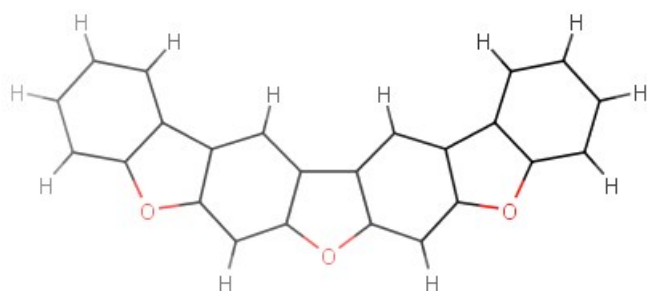

## Carb30

39

|   |               |               |               |
|---|---------------|---------------|---------------|
| C | 6.6526210459  | 0.1235437801  | 0.0008789601  |
| C | 7.0476488070  | 1.4609608474  | 0.0007948565  |
| C | 6.1040571483  | 2.4984465705  | 0.0008673656  |
| C | 4.7384720526  | 2.2269367219  | 0.0009740967  |
| C | 4.3200692519  | 0.8933393373  | 0.0009031252  |
| C | 5.2900223983  | -0.1222007027 | 0.0009021473  |
| C | 3.0384920535  | 0.2099402768  | 0.0006071543  |
| C | 3.3533933659  | -1.1686178147 | 0.0004772924  |
| O | 4.7111522247  | -1.3731184063 | 0.0007328020  |
| C | 1.7046296070  | 0.6195745070  | 0.0002977050  |
| C | 0.7264047382  | -0.3737218527 | -0.0000906942 |
| C | 1.1019673426  | -1.7363783690 | -0.0001954146 |
| C | 2.4120116731  | -2.1869219405 | 0.0000518218  |
| C | -0.7264034423 | -0.3737243818 | -0.0002722157 |
| C | -1.1019657127 | -1.7364008025 | -0.0004159264 |
| O | 0.0000129231  | -2.5600103651 | -0.0004614907 |
| C | -1.7046371756 | 0.6195511838  | -0.0002016561 |
| C | -3.0384956697 | 0.2099152645  | -0.0001832255 |
| C | -3.3533773142 | -1.1686752493 | -0.0002599724 |
| C | -2.4119855825 | -2.1869308554 | -0.0004032405 |
| C | -4.3200847497 | 0.8932946461  | -0.0002414464 |
| C | -5.2900450430 | -0.1222653265 | -0.0003632872 |
| O | -4.7111390474 | -1.3731677772 | -0.0002890298 |
| C | -4.7385163112 | 2.2268850635  | -0.0003671922 |
| C | -6.1040936373 | 2.4983750162  | -0.0007629669 |
| C | -7.0476798434 | 1.4608672715  | -0.0009565066 |
| C | -6.6526159681 | 0.1234707786  | -0.0007009361 |
| H | 7.3685604652  | -0.6884636076 | 0.0008488110  |
| H | 8.1043873758  | 1.7006591844  | 0.0006227060  |
| H | 6.4451375953  | 3.5270806909  | 0.0007887885  |
| H | 4.0174907511  | 3.0364056874  | 0.0010605925  |
| H | 1.4395052954  | 1.6700520289  | 0.0003642605  |
| H | 2.6780058364  | -3.2347889292 | -0.0000701102 |
| H | -1.4395266329 | 1.6700412497  | -0.0001771020 |
| H | -2.6779779461 | -3.2348221471 | -0.0004892377 |
| H | -4.0175368724 | 3.0363652319  | -0.0002081366 |

|   |               |               |               |
|---|---------------|---------------|---------------|
| H | -6.4451922326 | 3.5270010001  | -0.0009725240 |
| H | -8.1044121147 | 1.7005578596  | -0.0013578658 |
| H | -7.3685560519 | -0.6885564518 | -0.0008323079 |

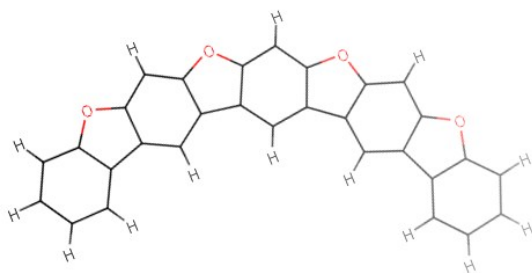

Carb40

48

|   |               |               |               |
|---|---------------|---------------|---------------|
| C | -7.9050166380 | 2.4801693309  | 0.3406720777  |
| C | -8.5268747760 | 1.2319685579  | 0.3225569727  |
| C | -7.7785026846 | 0.0471478570  | 0.2675133904  |
| C | -6.3871592790 | 0.0775906645  | 0.2294921614  |
| C | -5.7431447303 | 1.3180381244  | 0.2469588725  |
| C | -6.5212175775 | 2.4859196493  | 0.3014384481  |
| C | -4.3628187519 | 1.7692360832  | 0.2187495038  |
| C | -4.4338017157 | 3.1811998730  | 0.2575730020  |
| O | -5.7348729856 | 3.6173271530  | 0.3087717388  |
| C | -3.1212313732 | 1.1342520253  | 0.1642926731  |
| C | -1.9848105904 | 1.9425330354  | 0.1474320596  |
| C | -2.1201553308 | 3.3493249730  | 0.1846511118  |
| C | -3.3303378092 | 4.0204043657  | 0.2421223308  |
| C | -0.5536101235 | 1.6944252277  | 0.0925906837  |
| C | 0.0488831375  | 2.9725661443  | 0.0999389958  |
| O | -0.8946593557 | 3.9718930367  | 0.1551130499  |
| C | 0.2429043653  | 0.5500125622  | 0.0365419217  |
| C | 1.6259630807  | 0.7283376602  | -0.0131778280 |
| C | 2.1678219196  | 2.0333253771  | -0.0035374073 |
| C | 1.4153954854  | 3.1952734948  | 0.0532848421  |
| C | 2.7716971971  | -0.1639800403 | -0.0840877210 |
| C | 3.9039048202  | 0.6824526392  | -0.1106648465 |
| O | 3.5414871406  | 2.0078284014  | -0.0604373614 |
| C | 2.9381665233  | -1.5482324994 | -0.1306947026 |
| C | 4.2428272874  | -2.0388868161 | -0.2049229099 |
| C | 5.3349917211  | -1.1406020287 | -0.2279778126 |
| C | 5.2139333190  | 0.2396030044  | -0.1817076662 |
| C | 4.8381200981  | -3.3624577177 | -0.2742377326 |
| C | 6.2251585114  | -3.1499046467 | -0.3323295805 |
| O | 6.5326189407  | -1.8068774535 | -0.3045277139 |
| C | 4.3553949131  | -4.6741127426 | -0.2955240426 |
| C | 5.2698636684  | -5.7212515336 | -0.3732568385 |
| C | 6.6494155375  | -5.4746742015 | -0.4298445380 |
| C | 7.1528509884  | -4.1744366777 | -0.4098218976 |

|   |               |               |               |
|---|---------------|---------------|---------------|
| H | -8.4687961575 | 3.4033231070  | 0.3823743277  |
| H | -9.6087830289 | 1.1792270589  | 0.3507896079  |
| H | -8.2934109361 | -0.9062905842 | 0.2538015661  |
| H | -5.8181121955 | -0.8439031576 | 0.1861943628  |
| H | -3.0442656557 | 0.0538470953  | 0.1356874219  |
| H | -3.4065189946 | 5.0984062867  | 0.2708599330  |
| H | -0.1974328305 | -0.4400800612 | 0.0304269147  |
| H | 1.8543968991  | 4.1832006351  | 0.0585464425  |
| H | 2.0870305672  | -2.2185853508 | -0.1109767328 |
| H | 6.0630214099  | 0.9084967996  | -0.2009698057 |
| H | 3.2912972757  | -4.8763367862 | -0.2534846199 |
| H | 4.9122015987  | -6.7440283870 | -0.3909212667 |
| H | 7.3387835984  | -6.3084750087 | -0.4911823269 |
| H | 8.2144636442  | -3.9672050606 | -0.4530990936 |

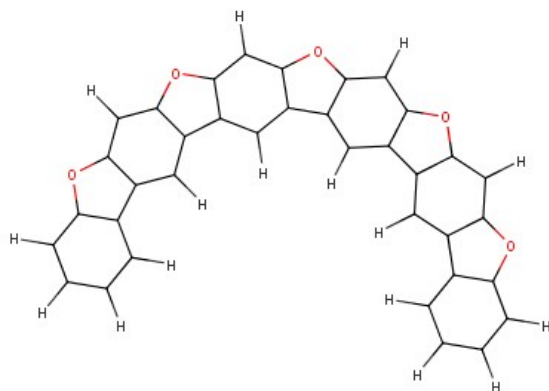

Carb50

57

|   |               |              |              |
|---|---------------|--------------|--------------|
| C | -8.2096118285 | 4.9262874484 | 0.5905832879 |
| C | -8.9722697492 | 3.7587248848 | 0.5654702763 |
| C | -8.3681412318 | 2.4969854751 | 0.4663048526 |
| C | -6.9839354483 | 2.3671497336 | 0.3936385701 |
| C | -6.2000859890 | 3.5239425021 | 0.4197965260 |
| C | -6.8358267574 | 4.7728202433 | 0.5139392295 |
| C | -4.7774114794 | 3.8112384909 | 0.3684833588 |
| C | -4.6821012207 | 5.2207350269 | 0.4290287804 |
| O | -5.9213199395 | 5.8044667070 | 0.5195574504 |
| C | -3.6196099569 | 3.0367744003 | 0.2838657954 |
| C | -2.3969239777 | 3.7073322229 | 0.2577407597 |
| C | -2.3661289147 | 5.1197905752 | 0.3112596540 |
| C | -3.4887222860 | 5.9260113353 | 0.4003959203 |
| C | -1.0057686056 | 3.2941079327 | 0.1794648429 |
| C | -0.2575889669 | 4.4928671350 | 0.1836317571 |
| O | -1.0759137708 | 5.5949204779 | 0.2659000773 |

|   |                |                |               |
|---|----------------|----------------|---------------|
| C | -0.3499823397  | 2.0647047110   | 0.1126516915  |
| C | 1.0434939055   | 2.0804769640   | 0.0472159570  |
| C | 1.7358770500   | 3.3121950861   | 0.0468349058  |
| C | 1.1251277960   | 4.5541457942   | 0.1156575696  |
| C | 2.0736003745   | 1.0589857725   | -0.0330325499 |
| C | 3.2976270645   | 1.7633857725   | -0.0793291317 |
| O | 3.0960223935   | 3.1228781223   | -0.0292454828 |
| C | 2.0704561686   | -0.3354752884  | -0.0737539044 |
| C | 3.3041342494   | -0.9800572188  | -0.1654979729 |
| C | 4.4948017635   | -0.2205706158  | -0.2116678088 |
| C | 4.5436103169   | 1.1636801102   | -0.1698696693 |
| C | 3.7284925459   | -2.3677898781  | -0.2428923941 |
| C | 5.1388737857   | -2.3245140867  | -0.3308963747 |
| O | 5.6026062184   | -1.0293545317  | -0.3111436889 |
| C | 3.0681755104   | -3.5961888690  | -0.2519664234 |
| C | 3.8506992245   | -4.7472963792  | -0.3510831491 |
| C | 5.2580785738   | -4.6403084407  | -0.4358239661 |
| C | 5.9531870708   | -3.4405632446  | -0.4291200443 |
| C | 3.5740517797   | -6.1720449717  | -0.4007341660 |
| C | 4.8266412376   | -6.7978037095  | -0.5103305491 |
| O | 5.8507532493   | -5.8749405035  | -0.5313483444 |
| C | 2.4233705944   | -6.9645324862  | -0.3677461181 |
| C | 2.5629922451   | -8.3475188381  | -0.4452223821 |
| C | 3.8285433583   | -8.9419660762  | -0.5538048816 |
| C | 4.9900392929   | -8.1704047909  | -0.5881274162 |
| H | -8.6617893477  | 5.9070409169   | 0.6657628912  |
| H | -10.0520318849 | 3.8293080942   | 0.6229813975  |
| H | -8.9907196037  | 1.6102883152   | 0.4456636917  |
| H | -6.5269608376  | 1.3871763542   | 0.3172229872  |
| H | -3.6696492333  | 1.9552679187   | 0.2405385253  |
| H | -3.4397638745  | 7.0050740255   | 0.4438762550  |
| H | -0.9016390518  | 1.1321795733   | 0.1120090756  |
| H | 1.6764035504   | 5.4841589456   | 0.1168053902  |
| H | 1.1441592473   | -0.8963714838  | -0.0377825132 |
| H | 5.4673898523   | 1.7239857825   | -0.2087699672 |
| H | 1.9882118976   | -3.6553626871  | -0.1870386968 |
| H | 7.0304890756   | -3.3823322621  | -0.4972962100 |
| H | 1.4405497493   | -6.5148961137  | -0.2847830611 |
| H | 1.6809989361   | -8.9766365144  | -0.4216421751 |
| H | 3.9068854530   | -10.0211257692 | -0.6125780474 |
| H | 5.9735337057   | -8.6150228373  | -0.6717844134 |

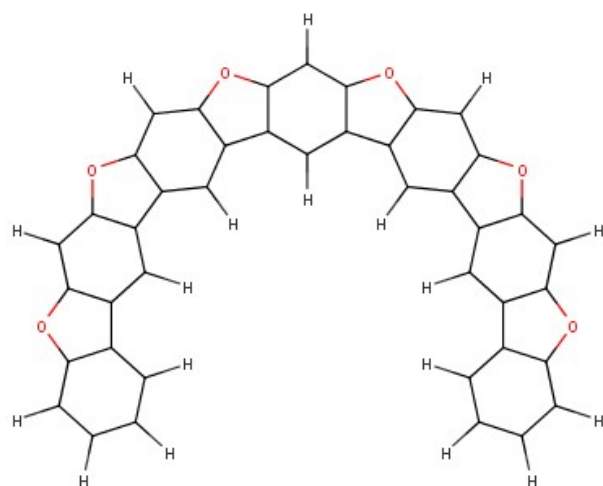

Carb60

66

|   |               |               |               |
|---|---------------|---------------|---------------|
| C | -7.4711281331 | 7.3749296993  | 0.9480379711  |
| C | -8.3672294656 | 6.3065477100  | 0.9205678564  |
| C | -7.9195877276 | 4.9853604162  | 0.7743201799  |
| C | -6.5633224962 | 4.6962648524  | 0.6495805568  |
| C | -5.6479326764 | 5.7522574819  | 0.6743729867  |
| C | -6.1281010814 | 7.0633875272  | 0.8236504865  |
| C | -4.2035110744 | 5.8730274544  | 0.5844474692  |
| C | -3.9401319947 | 7.2587888003  | 0.6883545236  |
| O | -5.0993144580 | 7.9811084546  | 0.8318552590  |
| C | -3.1486860686 | 4.9709300661  | 0.4401521293  |
| C | -1.8557846623 | 5.4925737161  | 0.4073664121  |
| C | -1.6555066981 | 6.8879665015  | 0.5147954645  |
| C | -2.6719418703 | 7.8179453841  | 0.6571271037  |
| C | -0.5250658665 | 4.9207301725  | 0.2874711218  |
| C | 0.3609278751  | 6.0208360939  | 0.3298118354  |
| O | -0.3189751277 | 7.2086260113  | 0.4664870232  |
| C | -0.0210172574 | 3.6259566340  | 0.1609699139  |
| C | 1.3641451161  | 3.4785238525  | 0.0809977298  |
| C | 2.1980761556  | 4.6184148196  | 0.1228562475  |
| C | 1.7402465803  | 5.9201513629  | 0.2482657891  |
| C | 2.2661171074  | 2.3454803535  | -0.0389439365 |
| C | 3.5648583796  | 2.9017623144  | -0.0645620156 |
| O | 3.5261672758  | 4.2732294649  | 0.0310054515  |
| C | 2.0999784803  | 0.9622907733  | -0.1145590446 |
| C | 3.2505263012  | 0.1795218793  | -0.2153214591 |
| C | 4.5221502256  | 0.7953683421  | -0.2438421222 |
| C | 4.7322995927  | 2.1628897572  | -0.1691789269 |
| C | 3.5109189112  | -1.2471954627 | -0.3069604844 |
| C | 4.9162624970  | -1.3669570034 | -0.3905915658 |
| O | 5.5284775784  | -0.1360883519 | -0.3499985170 |
| C | 2.7126433141  | -2.3914543429 | -0.3199817507 |

|   |               |                |               |
|---|---------------|----------------|---------------|
| C | 3.3561248503  | -3.6251185695  | -0.4227247486 |
| C | 4.7652295396  | -3.6796340629  | -0.5147627788 |
| C | 5.5950211382  | -2.5700473300  | -0.5000014944 |
| C | 2.9128855862  | -5.0085184880  | -0.4668979594 |
| C | 4.0936045523  | -5.7764490276  | -0.5893492207 |
| O | 5.2119231577  | -4.9764763023  | -0.6167635976 |
| C | 1.6721428807  | -5.6433169796  | -0.4160740427 |
| C | 1.6577472518  | -7.0362802838  | -0.4965201885 |
| C | 2.8716239868  | -7.7501290811  | -0.6267598698 |
| C | 4.1248234299  | -7.1585174248  | -0.6756055696 |
| C | 0.6187325918  | -8.0507796799  | -0.4871840605 |
| C | 1.2878606382  | -9.2786569695  | -0.6169890458 |
| O | 2.6527057427  | -9.1036392343  | -0.7003567681 |
| C | -0.7752613199 | -8.0477821805  | -0.3855389171 |
| C | -1.4496960264 | -9.2653535911  | -0.4198145600 |
| C | -0.7523661292 | -10.4747951194 | -0.5543726512 |
| C | 0.6384864086  | -10.5007683260 | -0.6560990169 |
| H | -7.8006571508 | 8.3996695251   | 1.0622636533  |
| H | -9.4287707042 | 6.5037502924   | 1.0139739550  |
| H | -8.6423852420 | 4.1779987626   | 0.7592104563  |
| H | -6.2278057363 | 3.6717970008   | 0.5357880147  |
| H | -3.3289868327 | 3.9054009307   | 0.3600430988  |
| H | -2.4920322059 | 8.8806090919   | 0.7403948379  |
| H | -0.6804227515 | 2.7666596323   | 0.1279337633  |
| H | 2.3980751504  | 6.7772003707   | 0.2830296615  |
| H | 1.1145557849  | 0.5118924704   | -0.0939244389 |
| H | 5.7152908141  | 2.6122398242   | -0.1881620869 |
| H | 1.6332752703  | -2.3242346910  | -0.2522817898 |
| H | 6.6718681726  | -2.6363007690  | -0.5667665132 |
| H | 0.7534103759  | -5.0770641164  | -0.3194169682 |
| H | 5.0414569874  | -7.7230418295  | -0.7739726869 |
| H | -1.3231167217 | -7.1182024009  | -0.2819944262 |
| H | -2.5305327113 | -9.2806503416  | -0.3422204313 |
| H | -1.3022268287 | -11.4083355365 | -0.5802836224 |
| H | 1.1898595835  | -11.4263088990 | -0.7613435957 |



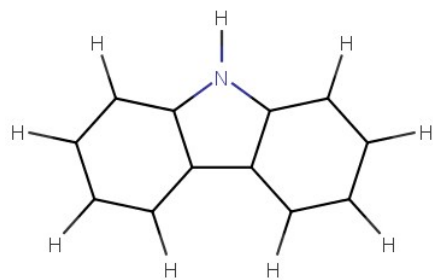

CarbN

22

|   |               |               |               |
|---|---------------|---------------|---------------|
| C | 2.4806197814  | 1.2208677871  | 0.0000000277  |
| C | 3.4243614105  | 0.1987297368  | 0.0000000124  |
| C | 3.0389506837  | -1.1519341793 | 0.0000000035  |
| C | 1.6947943499  | -1.5065642079 | -0.0000000461 |
| C | 0.7244396082  | -0.4997106481 | -0.0000000271 |
| C | 1.1331745165  | 0.8585070047  | -0.0000000031 |
| C | -0.7244395467 | -0.4997097798 | -0.0000000399 |
| C | -1.1331754684 | 0.8585074356  | 0.0000000006  |
| N | -0.0000005683 | 1.6577472650  | -0.0000000084 |
| C | -1.6947942659 | -1.5065638474 | -0.0000000506 |
| C | -3.0389516322 | -1.1519329142 | -0.0000000419 |
| C | -3.4243609070 | 0.1987313236  | 0.0000000079  |
| C | -2.4806191543 | 1.2208677955  | -0.0000000027 |
| H | 2.7878069882  | 2.2607489775  | 0.0000000493  |
| H | 4.4785419382  | 0.4513536735  | 0.0000000469  |
| H | 3.7994726690  | -1.9237671096 | -0.0000000028 |
| H | 1.4050545239  | -2.5515037064 | -0.0000000497 |
| H | 0.0000004329  | 2.6635967115  | 0.0000000178  |
| H | -1.4050546229 | -2.5515047618 | 0.0000000568  |
| H | -3.7994728234 | -1.9237675558 | -0.0000000350 |
| H | -4.4785414174 | 0.4513536571  | 0.0000000167  |
| H | -2.7878064726 | 2.2607473003  | 0.0000000672  |

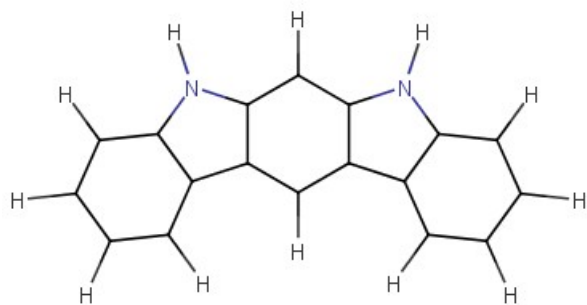

Carb2N

32

|   |               |               |               |
|---|---------------|---------------|---------------|
| C | -4.7533471923 | -0.6264617462 | 0.0013020231  |
| C | -5.3825734893 | 0.6163385284  | 0.0015952922  |
| C | -4.6408378327 | 1.8072157280  | 0.0007284978  |
| C | -3.2493878785 | 1.7781776439  | -0.0003736477 |
| C | -2.5928346080 | 0.5446523629  | -0.0005781670 |
| C | -3.3602562836 | -0.6466748875 | 0.0001956378  |
| C | -1.1972165325 | 0.1470421067  | -0.0011079044 |
| C | -1.1784352248 | -1.2808063975 | -0.0006723980 |
| N | -2.4897906298 | -1.7292426874 | -0.0001146112 |
| C | 0.0000008436  | 0.8600244156  | -0.0014360649 |
| C | 1.1972208807  | 0.1470442533  | -0.0011155902 |
| C | 1.1784419179  | -1.2808041881 | -0.0006832781 |
| C | 0.0000039116  | -2.0239742445 | -0.0005633579 |
| C | 2.5928397269  | 0.5446577680  | -0.0005925306 |
| C | 3.3602644225  | -0.6466683719 | 0.0001704166  |
| N | 2.4898002413  | -1.7292410098 | -0.0001379330 |
| C | 3.2493919053  | 1.7781850935  | -0.0003821108 |
| C | 4.6408422248  | 1.8072241005  | 0.0007135997  |
| C | 5.3825798859  | 0.6163481414  | 0.0015671569  |
| C | 4.7533559597  | -0.6264532506 | 0.0012685863  |
| H | -5.3324843139 | -1.5433782516 | 0.0020097811  |
| H | -6.4655333646 | 0.6616172931  | 0.0025491363  |
| H | -5.1587988203 | 2.7592499140  | 0.0009735853  |
| H | -2.6837631860 | 2.7033528239  | -0.0009940237 |
| H | -2.7703606071 | -2.6949117362 | 0.0006750509  |
| H | 0.0000024104  | 1.9440957602  | -0.0017362108 |
| H | 0.0000068563  | -3.1082760322 | -0.0001584552 |
| H | 2.7703731371  | -2.6949103216 | 0.0006419324  |
| H | 2.6837632693  | 2.7033586702  | -0.0009914839 |
| H | 5.1587995192  | 2.7592593999  | 0.0009641983  |
| H | 6.4655390833  | 0.6616288086  | 0.0025156559  |
| H | 5.3324937912  | -1.5433698168 | 0.0019672166  |

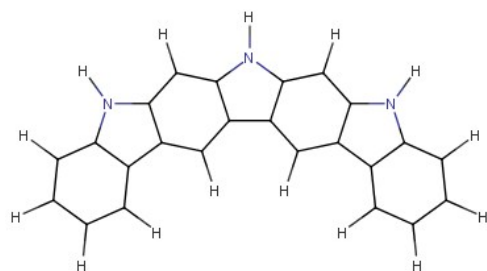

Carb3N

42

|   |               |               |               |
|---|---------------|---------------|---------------|
| C | -6.6623332899 | 0.3660589050  | 0.0010632331  |
| C | -6.9260134340 | 1.7337708522  | 0.0009209238  |
| C | -5.8851272928 | 2.6745187710  | 0.0001678471  |
| C | -4.5553499153 | 2.2642419347  | -0.0004217711 |
| C | -4.2626323365 | 0.8975989135  | -0.0002509768 |
| C | -5.3286692164 | -0.0368290974 | 0.0004589494  |
| C | -3.0306641261 | 0.1314758822  | -0.0005390761 |
| C | -3.4051332388 | -1.2444071950 | -0.0000179058 |
| N | -4.7897547668 | -1.3168879272 | 0.0004951136  |
| C | -1.6815198176 | 0.4880742623  | -0.0009813810 |
| C | -0.7267232205 | -0.5250651822 | -0.0008318827 |
| C | -1.1383547203 | -1.8912095288 | -0.0003362415 |
| C | -2.4739265853 | -2.2820994771 | 0.0000514191  |
| C | 0.7267112960  | -0.5250676184 | -0.0008292143 |
| C | 1.1383386321  | -1.8912133615 | -0.0003309229 |
| N | -0.0000094694 | -2.6859903401 | -0.0001937482 |
| C | 1.6815110922  | 0.4880692349  | -0.0009776578 |
| C | 3.0306542087  | 0.1314664715  | -0.0005310108 |
| C | 3.4051184268  | -1.2444179323 | -0.0000051995 |
| C | 2.4739084286  | -2.2821074743 | 0.0000628312  |
| C | 4.2626252478  | 0.8975850531  | -0.0002435666 |
| C | 5.3286592409  | -0.0368466162 | 0.0004709398  |
| N | 4.7897405313  | -1.3169039051 | 0.0005110046  |
| C | 4.5553478587  | 2.2642272501  | -0.0004200785 |
| C | 5.8851265003  | 2.6744991204  | 0.0001678493  |
| C | 6.9260096471  | 1.7337480114  | 0.0009251002  |
| C | 6.6623250521  | 0.3660365613  | 0.0010736723  |
| H | -7.4709266741 | -0.3564704492 | 0.0016603116  |
| H | -7.9547226310 | 2.0752188942  | 0.0014211707  |
| H | -6.1214306562 | 3.7321290476  | 0.0000655206  |
| H | -3.7568448981 | 2.9978958806  | -0.0009829899 |
| H | -5.3252292340 | -2.1682762727 | 0.0011086757  |
| H | -1.3860893339 | 1.5312410470  | -0.0013490663 |
| H | -2.7703059092 | -3.3248354336 | 0.0004913456  |
| H | -0.0000110706 | -3.6917148054 | 0.0004671151  |

|   |              |               |               |
|---|--------------|---------------|---------------|
| H | 1.3860840126 | 1.5312370009  | -0.0013488481 |
| H | 2.7702852013 | -3.3248443214 | 0.0005050397  |
| H | 5.3252117949 | -2.1682941759 | 0.0011312480  |
| H | 3.7568453114 | 2.9978841446  | -0.0009848961 |
| H | 6.1214336752 | 3.7321085359  | 0.0000605317  |
| H | 7.9547202330 | 2.0751918718  | 0.0014231309  |
| H | 7.4709156610 | -0.3564959000 | 0.0016734609  |

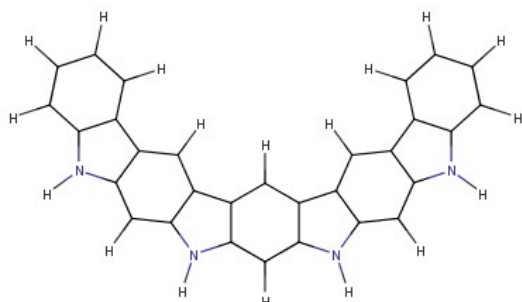

Carb4N

52

|   |               |               |               |
|---|---------------|---------------|---------------|
| H | 7.8193891093  | -4.5884248492 | -0.4309882314 |
| H | 6.6233881657  | -6.7591967261 | -0.4883518711 |
| H | 4.1556319159  | -6.8492602257 | -0.4197516565 |
| H | 2.8201930433  | -4.7678727442 | -0.2909431824 |
| H | 7.3432972984  | -1.8190630031 | -0.2974831835 |
| H | 6.1284097343  | 0.7057765580  | -0.1506879213 |
| H | 1.9496154384  | -2.1296806701 | -0.1480945065 |
| H | 4.2340395631  | 2.7644600117  | -0.0056135177 |
| H | 1.8597787522  | 4.2492625944  | 0.1308045796  |
| H | -0.1659415769 | -0.3726440377 | -0.0109785425 |
| H | -0.8466406228 | 4.9806203900  | 0.2427416706  |
| H | -3.6490813876 | 4.9683709542  | 0.3214626145  |
| H | -2.8881676281 | -0.0185013942 | 0.0851272571  |
| H | -6.3288163751 | 4.1401012184  | 0.3730064608  |
| H | -5.4176300116 | -1.1756114429 | 0.1084409306  |
| H | -7.8538429984 | -1.6145711030 | 0.1618232804  |
| H | -9.4667237488 | 0.2522387480  | 0.2913812350  |
| H | -8.6871617551 | 2.6042459759  | 0.3694556906  |
| C | 6.7360126608  | -4.6212250497 | -0.4003952056 |
| C | 6.0569279161  | -5.8368536286 | -0.4322669182 |
| C | 4.6557399123  | -5.8882738954 | -0.3931194322 |
| C | 3.9032151909  | -4.7201789005 | -0.3206815969 |
| N | 6.3862898254  | -2.1286764598 | -0.2830995270 |
| C | 5.9759192779  | -3.4553711949 | -0.3280252256 |
| C | 4.5592741066  | -3.4867175527 | -0.2869429228 |
| C | 5.2316907438  | 0.0967916056  | -0.1502970202 |
| C | 5.2788856903  | -1.2956041981 | -0.2134984585 |
| C | 4.1085314817  | -2.1103097343 | -0.2137736836 |

|   |               |               |               |
|---|---------------|---------------|---------------|
| C | 2.8464228679  | -1.5202111095 | -0.1491924971 |
| N | 3.5910556879  | 1.9910489172  | -0.0170384738 |
| C | 3.9571600388  | 0.6533761119  | -0.0869085675 |
| C | 2.7662972600  | -0.1323884101 | -0.0856098265 |
| C | 1.4244914253  | 3.2569000580  | 0.1005478763  |
| C | 2.2063292079  | 2.1056868031  | 0.0281490156  |
| C | 1.6517421012  | 0.7942145862  | -0.0125113413 |
| C | 0.2701621826  | 0.6197800002  | 0.0197714532  |
| N | -0.9781487118 | 3.9843117958  | 0.2009021570  |
| C | 0.0471419216  | 3.0480081655  | 0.1312167536  |
| C | -0.5397687890 | 1.7507941857  | 0.0921024535  |
| C | -3.4858701499 | 3.8979541013  | 0.2708087469  |
| C | -2.2102878525 | 3.3435362654  | 0.2093446987  |
| C | -1.9782165103 | 1.9374542544  | 0.1418345886  |
| C | -3.0518267503 | 1.0522670001  | 0.1350709998  |
| N | -5.9059481289 | 3.2293757812  | 0.3120713304  |
| C | -4.5408152042 | 2.9854891094  | 0.2621990455  |
| C | -4.3432904206 | 1.5748825479  | 0.1952991002  |
| C | -6.6010935588 | 2.0266221483  | 0.2818767058  |
| C | -5.6603856693 | 0.9686900601  | 0.2080867357  |
| C | -6.1192196200 | -0.3504531694 | 0.1648401212  |
| C | -7.4887111028 | -0.5948650744 | 0.1953055710  |
| C | -8.4042485136 | 0.4653944048  | 0.2686482915  |
| C | -7.9741554824 | 1.7892800514  | 0.3129539471  |

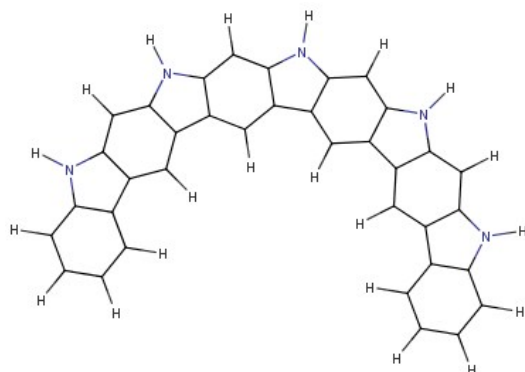

Carb5N

62

|   |               |              |              |
|---|---------------|--------------|--------------|
| C | -8.3718197174 | 3.9704020020 | 0.4615907237 |
| C | -8.9110359746 | 2.6871112728 | 0.3997394803 |
| C | -8.0863048392 | 1.5552778031 | 0.3106604696 |
| C | -6.7010597602 | 1.6862185944 | 0.2814868909 |
| C | -6.1347227129 | 2.9622244646 | 0.3417766486 |
| C | -6.9840567779 | 4.0932973247 | 0.4317935329 |
| C | -4.7720564489 | 3.4577212225 | 0.3335051687 |
| C | -4.8514930119 | 4.8784720712 | 0.4196712819 |

|   |               |               |               |
|---|---------------|---------------|---------------|
| N | -6.1914622742 | 5.2331823371  | 0.4775383513  |
| C | -3.5287836516 | 2.8303332830  | 0.2611320403  |
| C | -2.3850712033 | 3.6226201776  | 0.2753536886  |
| C | -2.4995932625 | 5.0420541507  | 0.3614482367  |
| C | -3.7243912828 | 5.7001631261  | 0.4356019991  |
| C | -0.9674003424 | 3.3178114513  | 0.2183247380  |
| C | -0.2741488245 | 4.5608320310  | 0.2714702467  |
| N | -1.2185392045 | 5.5777405971  | 0.3562934620  |
| C | -0.2548663762 | 2.1244488141  | 0.1297474283  |
| C | 1.1364091968  | 2.1832680126  | 0.0954172256  |
| C | 1.7993224957  | 3.4430232851  | 0.1500013387  |
| C | 1.1158422363  | 4.6547002383  | 0.2387495468  |
| C | 2.1686067125  | 1.1673656769  | 0.0093358002  |
| C | 3.4201322671  | 1.8477847491  | 0.0145244408  |
| N | 3.1685653157  | 3.2116382512  | 0.1001983443  |
| C | 2.1299540610  | -0.2228261083 | -0.0696556576 |
| C | 3.3351344653  | -0.9169743114 | -0.1432303624 |
| C | 4.5694633919  | -0.2063833143 | -0.1363660629 |
| C | 4.6432128809  | 1.1829595206  | -0.0577050735 |
| C | 3.6613002367  | -2.3281835783 | -0.2340326918 |
| C | 5.0842262279  | -2.4214116183 | -0.2789929619 |
| N | 5.6015580536  | -1.1343465060 | -0.2177811714 |
| C | 2.8852088516  | -3.4822277466 | -0.2798230038 |
| C | 3.5319895843  | -4.7144234760 | -0.3704792198 |
| C | 4.9558148755  | -4.7722437547 | -0.4134371441 |
| C | 5.7615541877  | -3.6345219485 | -0.3692855022 |
| C | 3.0565627191  | -6.0826778539 | -0.4375530605 |
| C | 4.2020833438  | -6.9134694958 | -0.5174639182 |
| N | 5.3313420702  | -6.1048295736 | -0.5011406201 |
| C | 1.7875836100  | -6.6678315772 | -0.4382223404 |
| C | 1.6778519986  | -8.0529935680 | -0.5169841395 |
| C | 2.8237979694  | -8.8591457355 | -0.5948830882 |
| C | 4.1004652610  | -8.3010067653 | -0.5961384715 |
| H | -9.0147698563 | 4.8409200591  | 0.5304053330  |
| H | -9.9877356013 | 2.5620959013  | 0.4211190539  |
| H | -8.5350260336 | 0.5697417047  | 0.2641741985  |
| H | -6.0692176512 | 0.8075458357  | 0.2125131584  |
| H | -6.5371265513 | 6.1752036806  | 0.5422143279  |
| H | -3.4561455363 | 1.7505727205  | 0.1956395526  |
| H | -3.7968924496 | 6.7799764909  | 0.5009010613  |
| H | -1.0046339685 | 6.5588479241  | 0.4086005233  |
| H | -0.7704235067 | 1.1715045803  | 0.0885701318  |
| H | 1.6315526353  | 5.6075821021  | 0.2799970956  |
| H | 3.8745928983  | 3.9272786626  | 0.1198597387  |
| H | 1.1833248272  | -0.7514102297 | -0.0730434968 |
| H | 5.5898270083  | 1.7116506354  | -0.0534767726 |
| H | 6.5806519695  | -0.9060449379 | -0.2354798956 |
| H | 1.8030271024  | -3.4258945377 | -0.2460501302 |
| H | 6.8437856661  | -3.6907301643 | -0.4028489112 |

|   |              |               |               |
|---|--------------|---------------|---------------|
| H | 6.2797708850 | -6.4357283203 | -0.5467296170 |
| H | 0.8980077309 | -6.0505056760 | -0.3784399857 |
| H | 0.6978880753 | -8.5161080338 | -0.5182043663 |
| H | 2.7152812114 | -9.9361524770 | -0.6551817434 |
| H | 4.9820747724 | -8.9295096215 | -0.6566858530 |

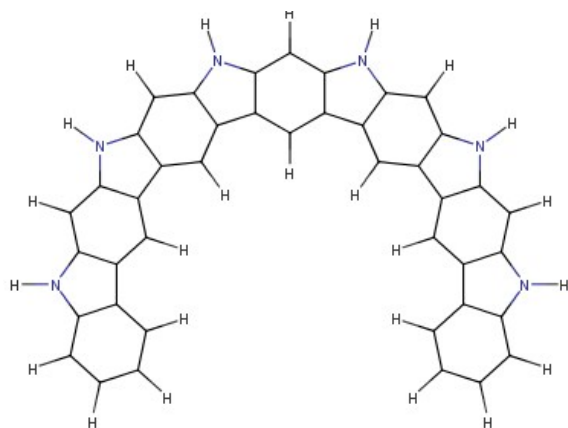

Carb6N

72

|   |               |              |              |
|---|---------------|--------------|--------------|
| C | -7.8123078399 | 6.0419160133 | 0.5770391556 |
| C | -8.4495326654 | 4.8055054657 | 0.5026971607 |
| C | -7.7158467492 | 3.6136773226 | 0.4062962185 |
| C | -6.3247949259 | 3.6354607787 | 0.3818517110 |
| C | -5.6600141637 | 4.8625568549 | 0.4550724519 |
| C | -6.4189622820 | 6.0558975357 | 0.5525506760 |
| C | -4.2628437018 | 5.2504311786 | 0.4552896710 |
| C | -4.2313752525 | 6.6726123889 | 0.5541310860 |
| N | -5.5402079711 | 7.1302617975 | 0.6116203656 |
| C | -3.0710932893 | 4.5299865238 | 0.3809929939 |
| C | -1.8698234354 | 5.2317178334 | 0.4063441590 |
| C | -1.8732724983 | 6.6548332889 | 0.5065649821 |
| C | -3.0441619705 | 7.4044981225 | 0.5823405261 |
| C | -0.4804595091 | 4.8179179112 | 0.3486457085 |
| C | 0.3085264592  | 6.0017103256 | 0.4157970920 |
| N | -0.5538764381 | 7.0889289842 | 0.5104957723 |
| C | 0.1353058850  | 3.5734331454 | 0.2472263148 |
| C | 1.5263739349  | 3.5234117247 | 0.2146743215 |
| C | 2.2881957558  | 4.7249348981 | 0.2840705919 |
| C | 1.7019812553  | 5.9860143985 | 0.3851945301 |
| C | 2.4720584379  | 2.4291239865 | 0.1193054328 |
| C | 3.7754663699  | 3.0038138529 | 0.1347441359 |

|   |               |                |               |
|---|---------------|----------------|---------------|
| N | 3.6348863803  | 4.3840117926   | 0.2338617381  |
| C | 2.3174902389  | 1.0489175502   | 0.0254035238  |
| C | 3.4609288035  | 0.2587005307   | -0.0517283749 |
| C | 4.7512258201  | 0.8617241368   | -0.0338940271 |
| C | 4.9396553108  | 2.2401360128   | 0.0592558717  |
| C | 3.6645269446  | -1.1725980571  | -0.1555404610 |
| C | 5.0715785889  | -1.3897265780  | -0.1973600248 |
| N | 5.6998208334  | -0.1516584247  | -0.1223857022 |
| C | 2.7869537129  | -2.2517609786  | -0.2139495973 |
| C | 3.3201253702  | -3.5336774737  | -0.3135941532 |
| C | 4.7314436322  | -3.7195664505  | -0.3538751209 |
| C | 5.6365523281  | -2.6606582854  | -0.2973728580 |
| C | 2.7173276376  | -4.8505457549  | -0.3938220930 |
| C | 3.7868942123  | -5.7906010502  | -0.4803214351 |
| N | 4.9828322191  | -5.0843546018  | -0.4527261760 |
| C | 1.3975994350  | -5.2904144001  | -0.3988300827 |
| C | 1.1549608786  | -6.6605440464  | -0.4896514694 |
| C | 2.2460603896  | -7.5745411794  | -0.5741018001 |
| C | 3.5795540587  | -7.1647565276  | -0.5719413397 |
| C | -0.0581374533 | -7.4540948191  | -0.5218223283 |
| C | 0.3390620732  | -8.8110354608  | -0.6229179663 |
| N | 1.7272245016  | -8.8595192722  | -0.6526357993 |
| C | -1.4197355848 | -7.1430512112  | -0.4750826598 |
| C | -2.3541295041 | -8.1726120739  | -0.5292677173 |
| C | -1.9417127544 | -9.5097573947  | -0.6288128802 |
| C | -0.5911097981 | -9.8475579722  | -0.6766958986 |
| H | -8.3858802691 | 6.9592335875   | 0.6510725385  |
| H | -9.5325141823 | 4.7654076811   | 0.5198404188  |
| H | -8.2398491075 | 2.6667335065   | 0.3501732423  |
| H | -5.7649613810 | 2.7097941955   | 0.3065033448  |
| H | -5.8129864296 | 8.0961222654   | 0.6781708966  |
| H | -3.0804974567 | 3.4485111314   | 0.3050758627  |
| H | -3.0345474295 | 8.4859732220   | 0.6579417472  |
| H | -0.2643668714 | 8.0504250980   | 0.5678088686  |
| H | -0.4543739558 | 2.6651580816   | 0.1944518173  |
| H | 2.2912076994  | 6.8947041730   | 0.4370465900  |
| H | 4.3966382244  | 5.0400231653   | 0.2637816266  |
| H | 1.3307839650  | 0.5993639166   | 0.0131872062  |
| H | 5.9264545326  | 2.6893044881   | 0.0724668372  |
| H | 6.6953218430  | -0.0092442060  | -0.1320608133 |
| H | 1.7142594011  | -2.0966792097  | -0.1834302681 |
| H | 6.7092266709  | -2.8157239126  | -0.3281721826 |
| H | 5.8975480899  | -5.4985495352  | -0.5104219430 |
| H | 0.5764731605  | -4.5853525490  | -0.3336930443 |
| H | 4.4004673005  | -7.8699833576  | -0.6370104350 |
| H | 2.2743016046  | -9.7005958506  | -0.7235087633 |
| H | -1.7458237487 | -6.1118628612  | -0.3962859566 |
| H | -3.4122263662 | -7.9411148096  | -0.4941057277 |
| H | -2.6865479066 | -10.2961378530 | -0.6691511115 |



H -0.2802910187 -10.8836127395 -0.7537969630

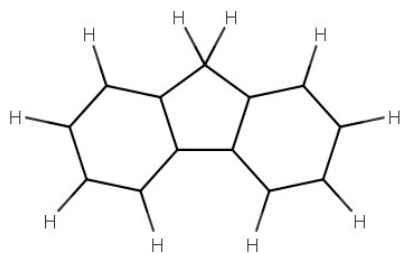

CarbC

23

|   |               |               |               |
|---|---------------|---------------|---------------|
| C | 2.5416394921  | 1.1687312957  | -0.0000571221 |
| C | 3.4586627194  | 0.1143097594  | -0.0000882137 |
| C | 3.0157219259  | -1.2110776198 | -0.0000463033 |
| C | 1.6526516254  | -1.5057863854 | 0.0000165714  |
| C | 0.7347973375  | -0.4545839771 | 0.0000298840  |
| C | 1.1829879465  | 0.8808889882  | 0.0000021538  |
| C | -0.7347970777 | -0.4545837610 | 0.0000301293  |
| C | -1.1829875130 | 0.8808888170  | 0.0000021822  |
| C | -0.0000000883 | 1.8255363401  | 0.0000230467  |
| C | -1.6526515020 | -1.5057860734 | 0.0000165568  |
| C | -3.0157221002 | -1.2110770733 | -0.0000464373 |
| C | -3.4586624176 | 0.1143109767  | -0.0000883738 |
| C | -2.5416384857 | 1.1687319449  | -0.0000572170 |
| H | 2.8929251980  | 2.1954733475  | -0.0000898421 |
| H | 4.5220200875  | 0.3257807102  | -0.0001504261 |
| H | 3.7398580772  | -2.0180827497 | -0.0000704466 |
| H | 1.3198662049  | -2.5379669491 | 0.0000457598  |
| H | -0.0000003654 | 2.4812134894  | 0.8785318020  |
| H | -0.0000004551 | 2.4812738689  | -0.8784386816 |
| H | -1.3198670957 | -2.5379669688 | 0.0000457279  |
| H | -3.7398583318 | -2.0180827618 | -0.0000705342 |
| H | -4.5220204107 | 0.3257812417  | -0.0001505124 |
| H | -2.8929248242 | 2.1954736991  | -0.0000896984 |

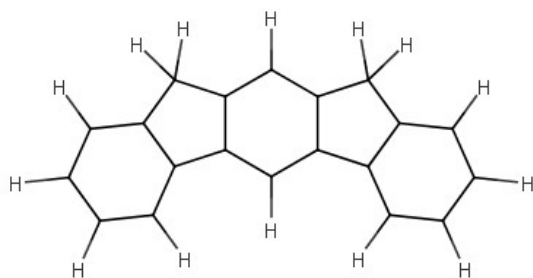

Carb2C

34

|   |               |               |               |
|---|---------------|---------------|---------------|
| C | 4.8181221147  | 0.4573363938  | 0.0002611441  |
| C | 5.3490863395  | -0.8355328236 | -0.0001732248 |
| C | 4.5050648808  | -1.9493197584 | -0.0005338106 |
| C | 3.1198292461  | -1.7910983855 | -0.0004271962 |
| C | 2.5879080818  | -0.5012229364 | 0.0000031562  |
| C | 3.4390671635  | 0.6202859011  | 0.0003088191  |
| C | 1.1950208244  | -0.0353439611 | 0.0000565260  |
| C | 1.1945740377  | 1.3761241235  | 0.0001996742  |
| C | 2.6182397990  | 1.8930404556  | 0.0005751461  |
| C | -0.0000012426 | -0.7544350002 | -0.0000208864 |
| C | -1.1950210548 | -0.0353426923 | -0.0000917797 |
| C | -1.1945736719 | 1.3761213199  | -0.0002306125 |
| C | -0.0000000890 | 2.0906472436  | -0.0000155523 |
| C | -2.5879072402 | -0.5012213424 | -0.0000189726 |
| C | -3.4390667560 | 0.6202845308  | -0.0003050049 |
| C | -2.6182394680 | 1.8930399163  | -0.0005883770 |
| C | -3.1198294939 | -1.7910968905 | 0.0004234876  |
| C | -4.5050641772 | -1.9493209635 | 0.0005655509  |
| C | -5.3490859638 | -0.8355337215 | 0.0002276767  |
| C | -4.8181218564 | 0.4573363772  | -0.0002215093 |
| H | 5.4797994212  | 1.3173948604  | 0.0005218525  |
| H | 6.4240063595  | -0.9763132825 | -0.0002592767 |
| H | 4.9328078157  | -2.9456507132 | -0.0009243088 |
| H | 2.4714034995  | -2.6604412678 | -0.0007312980 |
| H | 2.8290655761  | 2.5116020230  | 0.8808008595  |
| H | 2.8294044686  | 2.5122338350  | -0.8791180972 |
| H | 0.0000000669  | -1.8389579474 | -0.0000219429 |
| H | -0.0000001587 | 3.1765633532  | -0.0000126753 |
| H | -2.8290785666 | 2.5115971984  | -0.8808146929 |
| H | -2.8293923908 | 2.5122385735  | 0.8791045451  |
| H | -2.4714023248 | -2.6604415564 | 0.0007121388  |
| H | -4.9328076831 | -2.9456521719 | 0.0009679798  |
| H | -6.4240074618 | -0.9763145910 | 0.0003440488  |
| H | -5.4798002265 | 1.3173935466  | -0.0004633785 |

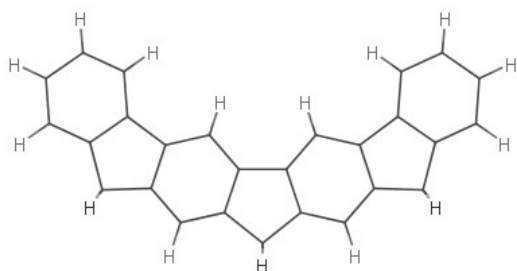

Carb3C

45

|   |               |               |               |
|---|---------------|---------------|---------------|
| C | -6.6057427173 | 0.6918323844  | 0.0014217171  |
| C | -6.7083831693 | 2.0855693241  | 0.0010074909  |
| C | -5.5592874377 | 2.8810366494  | -0.0001679254 |
| C | -4.2915635669 | 2.2999885032  | -0.0009052244 |
| C | -4.1862926446 | 0.9086106648  | -0.0004396230 |
| C | -5.3455690372 | 0.1088100711  | 0.0006863307  |
| C | -3.0077106231 | 0.0306811863  | -0.0007431701 |
| C | -3.4507149563 | -1.3096335258 | 0.0001311340  |
| C | -4.9640691945 | -1.3559052030 | 0.0010119819  |
| C | -1.6462884714 | 0.3383466004  | -0.0014307565 |
| C | -0.7355513868 | -0.7191796514 | -0.0011203218 |
| C | -1.1834168664 | -2.0581310171 | -0.0003079647 |
| C | -2.5410427274 | -2.3621893731 | 0.0002938955  |
| C | 0.7355458417  | -0.7191822039 | -0.0011294389 |
| C | 1.1834078958  | -2.0581345131 | -0.0003451440 |
| C | -0.0000059259 | -3.0006631199 | 0.0000262097  |
| C | 1.6462862859  | 0.3383408730  | -0.0014171279 |
| C | 3.0077072340  | 0.0306706428  | -0.0007557736 |
| C | 3.4507086844  | -1.3096445866 | 0.0000491760  |
| C | 2.5410327902  | -2.3621977292 | 0.0002083583  |
| C | 4.1862911348  | 0.9085977208  | -0.0004073208 |
| C | 5.3455661208  | 0.1087949518  | 0.0006561933  |
| C | 4.9640632552  | -1.3559192735 | 0.0008773736  |
| C | 4.2915633184  | 2.2999757389  | -0.0007641694 |
| C | 5.5592880089  | 2.8810223644  | 0.0000193210  |
| C | 6.7083824827  | 2.0855527282  | 0.0011306005  |
| C | 6.6057400676  | 0.6918161526  | 0.0014340117  |
| H | -7.5013941807 | 0.0788539849  | 0.0023438995  |
| H | -7.6864531142 | 2.5534106666  | 0.0016189270  |
| H | -5.6550534072 | 3.9610706315  | -0.0004819995 |
| H | -3.4059215266 | 2.9260225526  | -0.0017969387 |
| H | -5.3597752542 | -1.8798127966 | -0.8769250421 |
| H | -5.3587450326 | -1.8791596261 | 0.8798004364  |
| H | -1.3081819412 | 1.3689455219  | -0.0020667291 |
| H | -2.8806087012 | -3.3938434846 | 0.0010155042  |

|   |               |               |               |
|---|---------------|---------------|---------------|
| H | -0.0000221083 | -3.6576870559 | -0.8777624709 |
| H | 0.0000085646  | -3.6570502848 | 0.8782860488  |
| H | 1.3081841135  | 1.3689409890  | -0.0020067422 |
| H | 2.8805946011  | -3.3938534568 | 0.0008947689  |
| H | 5.3597315059  | -1.8797477775 | -0.8771243949 |
| H | 5.3587747181  | -1.8792544196 | 0.8796007789  |
| H | 3.4059205102  | 2.9260108320  | -0.0016006615 |
| H | 5.6550547032  | 3.9610567408  | -0.0002057786 |
| H | 7.6864520032  | 2.5533931289  | 0.0017813610  |
| H | 7.5013905214  | 0.0788375392  | 0.0023091252  |

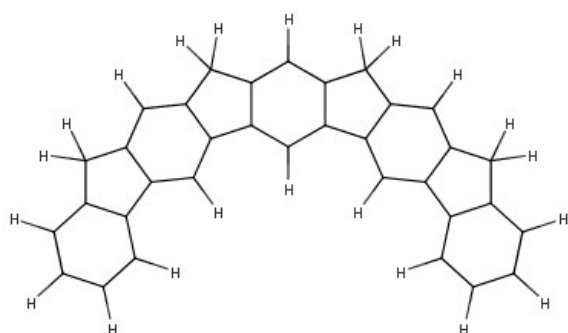

Carb4C

56

|   |               |               |               |
|---|---------------|---------------|---------------|
| C | -7.9037704885 | 1.1541397568  | 0.2795653877  |
| C | -8.1358871487 | -0.2227124562 | 0.2150159184  |
| C | -7.0664044805 | -1.1191265101 | 0.1389484750  |
| C | -5.7508534438 | -0.6571341960 | 0.1265314919  |
| C | -5.5168816523 | 0.7171256786  | 0.1910914628  |
| C | -6.5957755950 | 1.6192341847  | 0.2670494896  |
| C | -4.2624302600 | 1.4819656275  | 0.1957218914  |
| C | -4.5774341506 | 2.8556768849  | 0.2738939609  |
| C | -6.0791341649 | 3.0411698394  | 0.3252993509  |
| C | -2.9366343866 | 1.0514830582  | 0.1380543459  |
| C | -1.9324895068 | 2.0198394961  | 0.1595778858  |
| C | -2.2506732284 | 3.3927239432  | 0.2383022414  |
| C | -3.5736639568 | 3.8190625314  | 0.2957202155  |
| C | -0.4702519637 | 1.8808605312  | 0.1113543198  |
| C | 0.1051987477  | 3.1687819928  | 0.1609995085  |
| C | -0.9820829585 | 4.2184567217  | 0.2463682444  |
| C | 0.3298223924  | 0.7406243673  | 0.0307468510  |
| C | 1.7141366395  | 0.9124085082  | 0.0015237357  |
| C | 2.2861858552  | 2.2019438556  | 0.0514913366  |
| C | 1.4858824534  | 3.3372073969  | 0.1311383759  |
| C | 2.7981770180  | -0.0765634685 | -0.0783476265 |
| C | 4.0324000260  | 0.6084096756  | -0.0766840241 |

|   |               |               |               |
|---|---------------|---------------|---------------|
| C | 3.7959814514  | 2.1009048932  | 0.0062914417  |
| C | 2.7520622049  | -1.4689705902 | -0.1494778761 |
| C | 3.9613068787  | -2.1610282035 | -0.2196155198 |
| C | 5.1941178426  | -1.4733879699 | -0.2182460740 |
| C | 5.2368645333  | -0.0844662974 | -0.1463723874 |
| C | 4.2329864452  | -3.6019873662 | -0.3041298156 |
| C | 5.6269009434  | -3.7967105023 | -0.3553368516 |
| C | 6.3385313228  | -2.4610573472 | -0.3065739294 |
| C | 3.3669070246  | -4.6955204213 | -0.3369477306 |
| C | 3.9041917282  | -5.9794235325 | -0.4211955555 |
| C | 5.2875513032  | -6.1712094915 | -0.4718845682 |
| C | 6.1569132737  | -5.0772352367 | -0.4389635785 |
| H | -8.7380637940 | 1.8455681208  | 0.3385476939  |
| H | -9.1528152894 | -0.5985344423 | 0.2238282518  |
| H | -7.2625904049 | -2.1844345787 | 0.0891228869  |
| H | -4.9266426531 | -1.3596116371 | 0.0670897325  |
| H | -6.3969282808 | 3.5541124858  | 1.2407455792  |
| H | -6.4464661953 | 3.6446932665  | -0.5130514620 |
| H | -2.6948056510 | -0.0041624199 | 0.0781691944  |
| H | -3.8159164490 | 4.8759475016  | 0.3561642068  |
| H | -0.8956005546 | 4.8236332235  | 1.1566778561  |
| H | -0.9447134789 | 4.9183148474  | -0.5968390832 |
| H | -0.1128057705 | -0.2490359019 | -0.0078254874 |
| H | 1.9281643367  | 4.3283278982  | 0.1692193560  |
| H | 4.2619716249  | 2.5397796092  | 0.8964842102  |
| H | 4.2167381814  | 2.6292149103  | -0.8575373030 |
| H | 1.8046370488  | -1.9969409314 | -0.1503213315 |
| H | 6.1853400804  | 0.4444854106  | -0.1459341047 |
| H | 7.0131165237  | -2.3889892264 | 0.5546992525  |
| H | 6.9535512391  | -2.2941734018 | -1.1986756853 |
| H | 2.2920638710  | -4.5557211324 | -0.2984167341 |
| H | 3.2425883169  | -6.8381306840 | -0.4477412506 |
| H | 5.6891807275  | -7.1761449990 | -0.5374026293 |
| H | 7.2302357241  | -5.2326432949 | -0.4778935197 |

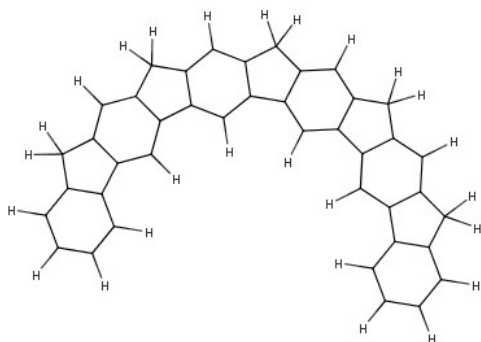

Carb5C

|   |               |               |               |
|---|---------------|---------------|---------------|
| C | -8.2915675704 | 2.9613865563  | 0.3964370922  |
| C | -8.5762317288 | 1.5951842414  | 0.3190028673  |
| C | -7.5422062333 | 0.6590133060  | 0.2344360972  |
| C | -6.2099246605 | 1.0698950748  | 0.2262777049  |
| C | -5.9232927089 | 2.4334217622  | 0.3038302767  |
| C | -6.9664922204 | 3.3756039398  | 0.3882244285  |
| C | -4.6403660581 | 3.1489928697  | 0.3161799967  |
| C | -4.9014964278 | 4.5331965532  | 0.4074261302  |
| C | -6.3950595703 | 4.7755750370  | 0.4597855194  |
| C | -3.3326706583 | 2.6679928638  | 0.2549451247  |
| C | -2.2922651475 | 3.5965828947  | 0.2862184578  |
| C | -2.5556249808 | 4.9799931307  | 0.3784405075  |
| C | -3.8611888656 | 5.4571189370  | 0.4394493527  |
| C | -0.8377640380 | 3.3991373242  | 0.2368821175  |
| C | -0.2092059975 | 4.6610775396  | 0.2995498132  |
| C | -1.2538290899 | 5.7531317698  | 0.3954107371  |
| C | -0.0872909185 | 2.2269813316  | 0.1449652224  |
| C | 1.3025976420  | 2.3403904206  | 0.1181756386  |
| C | 1.9293331451  | 3.6032609529  | 0.1821589123  |
| C | 1.1778236607  | 4.7711950239  | 0.2726738266  |
| C | 2.3413861211  | 1.3058697004  | 0.0289986396  |
| C | 3.6048970927  | 1.9344718268  | 0.0405458860  |
| C | 3.4334881647  | 3.4356603190  | 0.1381529807  |
| C | 2.2311771948  | -0.0818133295 | -0.0582018009 |
| C | 3.4071311664  | -0.8281355269 | -0.1338067915 |
| C | 4.6696416532  | -0.1977039578 | -0.1216738893 |
| C | 4.7765652184  | 1.1871006493  | -0.0341707377 |
| C | 3.6085800236  | -2.2795216080 | -0.2334280740 |
| C | 4.9949294041  | -2.5390893290 | -0.2817072983 |
| C | 5.7661505260  | -1.2376568180 | -0.2174185749 |
| C | 2.6810921743  | -3.3203237474 | -0.2802689421 |
| C | 3.1661240054  | -4.6244704798 | -0.3755288397 |
| C | 4.5531918851  | -4.8818553509 | -0.4232628806 |
| C | 5.4760749456  | -3.8411405104 | -0.3767914478 |
| C | 2.4524632636  | -5.9067324312 | -0.4424290228 |
| C | 3.3986998620  | -6.9458497820 | -0.5315350385 |
| C | 4.7995768427  | -6.3721086392 | -0.5271000028 |
| C | 1.0873788154  | -6.1960811143 | -0.4287841901 |
| C | 0.6790625961  | -7.5270023315 | -0.5047325512 |
| C | 1.6192758312  | -8.5569778365 | -0.5936415834 |
| C | 2.9870191356  | -8.2695724989 | -0.6076463662 |
| H | -9.0993217597 | 3.6831615917  | 0.4618333233  |
| H | -9.6067384043 | 1.2587007850  | 0.3242800637  |
| H | -7.7790844685 | -0.3973269341 | 0.1744033084  |
| H | -5.4135351397 | 0.3367127336  | 0.1603490595  |
| H | -6.6922441108 | 5.2906829992  | 1.3808641376  |
| H | -6.7372141443 | 5.3987841953  | -0.3747662989 |
| H | -3.1302019646 | 1.6046413395  | 0.1858136144  |

|   |               |               |               |
|---|---------------|---------------|---------------|
| H | -4.0635561167 | 6.5218926377  | 0.5097814254  |
| H | -1.1432263947 | 6.3425036318  | 1.3134196072  |
| H | -1.1881131842 | 6.4581934793  | -0.4417375617 |
| H | -0.5700003548 | 1.2569030455  | 0.0966404291  |
| H | 1.6610126114  | 5.7427640412  | 0.3213103892  |
| H | 3.9147376089  | 3.8445648093  | 1.0345299845  |
| H | 3.8770635119  | 3.9523671677  | -0.7212784278 |
| H | 1.2605446623  | -0.5657176695 | -0.0668521266 |
| H | 5.7486105782  | 1.6716946982  | -0.0257212686 |
| H | 6.4397538005  | -1.2046103566 | 0.6471148864  |
| H | 6.3889788393  | -1.0908196233 | -1.1078780444 |
| H | 1.6155366271  | -3.1208822438 | -0.2445290993 |
| H | 6.5430951258  | -4.0404811666 | -0.4135617002 |
| H | 5.3917884428  | -6.7480103442 | 0.3154644638  |
| H | 5.3487211437  | -6.6315212393 | -1.4398189895 |
| H | 0.3510263839  | -5.4028384484 | -0.3602573006 |
| H | -0.3784688745 | -7.7659442991 | -0.4946393206 |
| H | 1.2847480471  | -9.5864400079 | -0.6527372500 |
| H | 3.7119041362  | -9.0741935267 | -0.6770666174 |

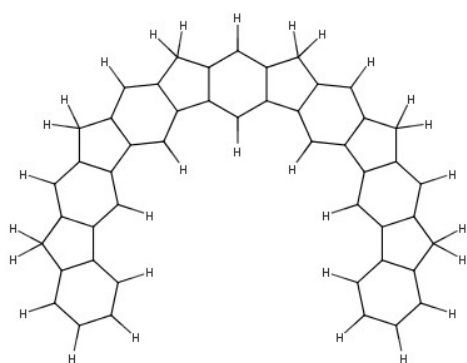

Carb6C

78

|   |               |              |              |
|---|---------------|--------------|--------------|
| C | -2.8871081912 | 4.0805004916 | 0.3585367755 |
| C | -5.8772006140 | 6.2882042132 | 0.5714988229 |
| C | -4.3920867202 | 5.9964322928 | 0.5234820944 |
| C | -4.1776248858 | 4.6050322800 | 0.4191096129 |
| C | -6.4950147888 | 4.9085224767 | 0.4838558383 |
| C | -5.4832956071 | 3.9329539552 | 0.3941121695 |
| C | -5.8139378234 | 2.5802353663 | 0.3019946724 |
| C | -7.1590107734 | 2.2131487318 | 0.3011376631 |
| C | -8.1620438888 | 3.1820533645 | 0.3909506350 |
| C | -7.8332459054 | 4.5375472083 | 0.4828069604 |
| C | -1.8165529679 | 4.9731134612 | 0.4040471677 |



|   |               |               |               |
|---|---------------|---------------|---------------|
| C | -2.0318972779 | 6.3637989461  | 0.5096017690  |
| C | -3.3210043985 | 6.8843164601  | 0.5698440042  |
| C | -0.3706651844 | 4.7252998940  | 0.3592548389  |
| C | 0.3030297335  | 5.9628256477  | 0.4377243372  |
| C | -0.7031041107 | 7.0905646038  | 0.5404219904  |
| C | 0.3358632855  | 3.5278289341  | 0.2586931334  |
| C | 1.7283440806  | 3.5912305574  | 0.2396757857  |
| C | 2.4025801587  | 4.8280022994  | 0.3198675620  |
| C | 1.6938330723  | 6.0221984833  | 0.4187909327  |
| C | 2.7247606173  | 2.5185792068  | 0.1451070899  |
| C | 4.0129635770  | 3.0942045420  | 0.1699305402  |
| C | 3.9000567290  | 4.6013077631  | 0.2813117292  |
| C | 2.5551977128  | 1.1389182096  | 0.0433977517  |
| C | 3.6982117463  | 0.3449514630  | -0.0325403097 |
| C | 4.9870510453  | 0.9188078906  | -0.0070830661 |
| C | 5.1525607718  | 2.2976352156  | 0.0945514712  |
| C | 3.8335090935  | -1.1116669728 | -0.1437801079 |
| C | 5.2059848511  | -1.4356930649 | -0.1856827592 |
| C | 6.0359915617  | -0.1704116872 | -0.1054137964 |
| C | 2.8567067906  | -2.1045028305 | -0.2053664162 |
| C | 3.2781455805  | -3.4292553325 | -0.3093054403 |
| C | 4.6506236283  | -3.7541146598 | -0.3509589589 |
| C | 5.6232877605  | -2.7598145700 | -0.2893505616 |
| C | 2.4982654008  | -4.6699921591 | -0.3933773852 |
| C | 3.3920588049  | -5.7579656094 | -0.4889724142 |
| C | 4.8208310561  | -5.2546498580 | -0.4687412068 |
| C | 1.1182791369  | -4.8712984161 | -0.3890295833 |
| C | 0.6491197114  | -6.1809694751 | -0.4825932460 |
| C | 1.5433526012  | -7.2686396825 | -0.5799927623 |
| C | 2.9204675470  | -7.0638129144 | -0.5836744294 |
| C | -0.7236313321 | -6.7021861247 | -0.5018969655 |
| C | -0.6727897647 | -8.1050009888 | -0.6118213196 |
| C | 0.7685459538  | -8.5671595171 | -0.6693618829 |
| C | -1.9515761783 | -6.0430256284 | -0.4316006537 |
| C | -3.1243918652 | -6.7957856973 | -0.4722189168 |
| C | -3.0733050333 | -8.1881042518 | -0.5815061497 |
| C | -1.8441229146 | -8.8502228906 | -0.6519414461 |
| H | -8.6174993243 | 5.2843884818  | 0.5519922585  |
| H | -9.2030892019 | 2.8796212099  | 0.3889115593  |
| H | -7.4297953258 | 1.1656500396  | 0.2295401958  |
| H | -5.0424630785 | 1.8212171179  | 0.2318319200  |
| H | -6.1616435632 | 6.8064840126  | 1.4947339987  |
| H | -6.1948658104 | 6.9314996121  | -0.2574078983 |
| H | -2.7200676723 | 3.0116446764  | 0.2797767849  |
| H | -3.4876678690 | 7.9545129668  | 0.6501550320  |
| H | -0.5753527038 | 7.6677332464  | 1.4638521055  |
| H | -0.6084467814 | 7.8030103685  | -0.2876262615 |
| H | -0.1806311262 | 2.5760654730  | 0.1982691109  |
| H | 2.2111669523  | 6.9751773744  | 0.4799378122  |

|   |               |               |               |
|---|---------------|---------------|---------------|
| H | 4.3935638498  | 4.9842006793  | 1.1824339817  |
| H | 4.3685904607  | 5.1095830678  | -0.5697576401 |
| H | 1.5654683665  | 0.6956315001  | 0.0242417966  |
| H | 6.1439116581  | 2.7408882375  | 0.1137371098  |
| H | 6.7064768487  | -0.1741278159 | 0.7620562082  |
| H | 6.6725538315  | -0.0453483202 | -0.9894580289 |
| H | 1.8017962250  | -1.8546820476 | -0.1740622307 |
| H | 6.6795108057  | -3.0103718219 | -0.3221601389 |
| H | 5.3882598864  | -5.6698016609 | 0.3726077086  |
| H | 5.3653897279  | -5.5329811780 | -1.3788077737 |
| H | 0.4312907307  | -4.0351787327 | -0.3147166456 |
| H | 3.6083874612  | -7.9008920241 | -0.6582929175 |
| H | 1.0135558567  | -9.2463545255 | 0.1555032713  |
| H | 0.9865126800  | -9.1107158530 | -1.5960104817 |
| H | -1.9994650216 | -4.9629085464 | -0.3466824905 |
| H | -4.0856716748 | -6.2969152428 | -0.4189146868 |
| H | -3.9948520127 | -8.7583316544 | -0.6116388269 |
| H | -1.8129360923 | -9.9316301936 | -0.7365503999 |

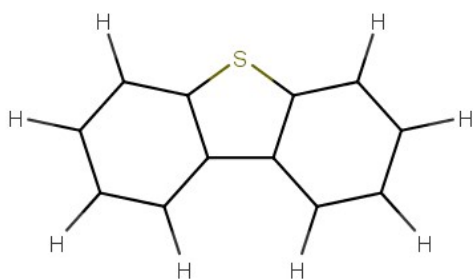

CarbS

21

|   |               |               |               |
|---|---------------|---------------|---------------|
| C | 3.4695992339  | 0.4545846616  | 0.0952825389  |
| C | 3.0324049422  | -0.8749388036 | 0.1793295743  |
| C | 1.6771461825  | -1.1750454851 | 0.1522054825  |
| C | 0.7353079581  | -0.1427408277 | 0.0397607364  |
| C | 1.1949023857  | 1.1887460439  | -0.0446186941 |
| C | 2.5556745319  | 1.4959977521  | -0.0173244561 |
| C | -0.7153151830 | -0.2255504942 | -0.0082753132 |
| C | -1.3174215542 | 1.0451415877  | -0.1286811147 |
| S | -0.1283016323 | 2.3496781628  | -0.1846186208 |
| C | -1.5385261112 | -1.3587765069 | 0.0474167773  |
| C | -2.9178991272 | -1.2156554516 | -0.0167435684 |
| C | -3.4976738385 | 0.0554725900  | -0.1362885841 |
| C | -2.7031250500 | 1.1948055651  | -0.1929635182 |
| H | 4.5306186869  | 0.6751419773  | 0.1178620833  |
| H | 3.7589369933  | -1.6745059926 | 0.2657401559  |
| H | 1.3497322646  | -2.2065734942 | 0.2180477099  |
| H | 2.8945414108  | 2.5231590342  | -0.0833340097 |
| H | -1.0993569469 | -2.3457544406 | 0.1400332941  |
| H | -3.5527858230 | -2.0929642266 | 0.0260976654  |
| H | -4.5760821084 | 0.1533699950  | -0.1846539425 |
| H | -3.1519872637 | 2.1768983194  | -0.2842741902 |

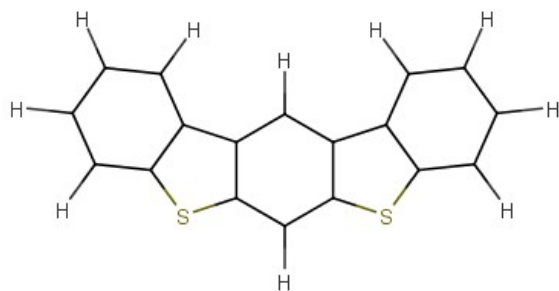

Carb2S

30

|   |               |               |               |
|---|---------------|---------------|---------------|
| C | -5.2374633943 | -1.0757244862 | 0.0715475613  |
| C | -4.6810152414 | 0.2105922184  | 0.0710974152  |
| C | -3.3031685904 | 0.3836165311  | 0.0514998905  |
| C | -2.4586814205 | -0.7345782313 | 0.0320252602  |
| C | -3.0380907517 | -2.0205297218 | 0.0324238047  |
| C | -4.4205874928 | -2.2010720097 | 0.0521249711  |
| C | -1.0048358238 | -0.7852090440 | 0.0097901700  |
| C | -0.5199399524 | -2.1179510299 | -0.0070685881 |
| S | -1.8253836959 | -3.3067068661 | 0.0049928260  |
| C | -0.0943312340 | 0.2717939417  | 0.0039147618  |
| C | 1.2755722166  | 0.0086129081  | -0.0191723759 |
| C | 1.7235249909  | -1.3372002092 | -0.0361608479 |
| C | 0.8396210338  | -2.4112500047 | -0.0300825051 |
| C | 2.3829908717  | 0.9519470851  | -0.0291515745 |
| C | 3.6357479236  | 0.3045374437  | -0.0536269188 |
| S | 3.4848154221  | -1.4569923108 | -0.0651134068 |
| C | 2.3500561986  | 2.3530024703  | -0.0178697681 |
| C | 3.5370693494  | 3.0738000559  | -0.0305070924 |
| C | 4.7721233495  | 2.4116880111  | -0.0546898660 |
| C | 4.8310971006  | 1.0223620880  | -0.0665641574 |
| H | -6.3142984482 | -1.1981960602 | 0.0869365741  |
| H | -5.3319178044 | 1.0769697579  | 0.0860807437  |
| H | -2.8825190130 | 1.3830111683  | 0.0511222283  |
| H | -4.8516583955 | -3.1952415264 | 0.0521661606  |
| H | -0.4504819925 | 1.2955928560  | 0.0176769894  |
| H | 1.1953082101  | -3.4341750795 | -0.0427261761 |
| H | 1.3997403399  | 2.8747701396  | 0.0004012222  |
| H | 3.5087250683  | 4.1570898767  | -0.0217011440 |
| H | 5.6919030656  | 2.9849948623  | -0.0644016824 |
| H | 5.7861982657  | 0.5109651052  | -0.0853644771 |

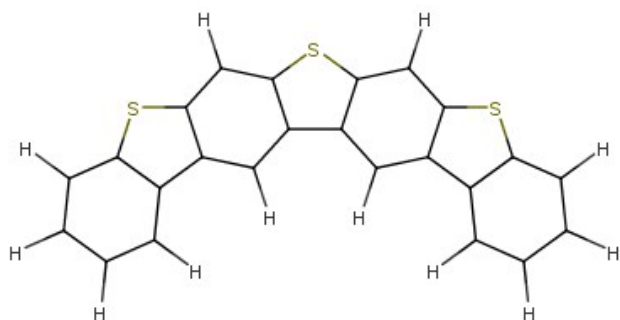

Carb3S

39

|   |               |               |               |
|---|---------------|---------------|---------------|
| C | -5.9290558518 | 3.1470055791  | 0.1055811233  |
| C | -5.4940191527 | 1.8160153652  | 0.0551080601  |
| C | -4.1382190380 | 1.5161794641  | 0.0480812049  |
| C | -3.1933839992 | 2.5503338313  | 0.0918551245  |
| C | -3.6519503489 | 3.8833316612  | 0.1434500761  |
| C | -5.0119570282 | 4.1910018052  | 0.1502754677  |
| C | -1.7408040399 | 2.4673320287  | 0.0938688048  |
| C | -1.1365839526 | 3.7490345248  | 0.1488941475  |
| S | -2.3269408816 | 5.0513276588  | 0.1971949841  |
| C | -0.9298840599 | 1.3319430094  | 0.0505263599  |
| C | 0.4583833352  | 1.4676164133  | 0.0624664853  |
| C | 1.0247900830  | 2.7665843183  | 0.1191850192  |
| C | 0.2443739521  | 3.9157770654  | 0.1624360759  |
| C | 1.4777112236  | 0.4280173484  | 0.0242681196  |
| C | 2.7891529007  | 0.9672084005  | 0.0535825964  |
| S | 2.7911733362  | 2.7323031066  | 0.1273916006  |
| C | 1.3133377769  | -0.9559497813 | -0.0350319518 |
| C | 2.4327970460  | -1.7893788460 | -0.0637590516 |
| C | 3.7276400089  | -1.2120854742 | -0.0327318240 |
| C | 3.9229807251  | 0.1639140537  | 0.0257694516  |
| C | 2.4863348989  | -3.2421872367 | -0.1244718646 |
| C | 3.8108344986  | -3.7274065114 | -0.1389584186 |
| S | 5.0064506056  | -2.4276532828 | -0.0777223222 |
| C | 1.4325482497  | -4.1651653320 | -0.1670770863 |
| C | 1.7053111623  | -5.5255663085 | -0.2228257678 |
| C | 3.0282148558  | -5.9871462122 | -0.2369578415 |
| C | 4.0913083025  | -5.0921163403 | -0.1950333870 |
| H | -6.9903815116 | 3.3674147746  | 0.1102194776  |
| H | -6.2223249951 | 1.0141298932  | 0.0214843761  |
| H | -3.8132847709 | 0.4824793546  | 0.0087837461  |
| H | -5.3484420025 | 5.2203012158  | 0.1901593985  |
| H | -1.3809509798 | 0.3469083135  | 0.0083839470  |
| H | 0.6934295496  | 4.9004820810  | 0.2045672471  |
| H | 0.3185763452  | -1.3865956866 | -0.0587021508 |
| H | 4.9175662818  | 0.5921721685  | 0.0480221115  |
| H | 0.4048531584  | -3.8195966754 | -0.1562256871 |

|   |              |               |               |
|---|--------------|---------------|---------------|
| H | 0.8883341164 | -6.2369798452 | -0.2555178501 |
| H | 3.2274651643 | -7.0517715853 | -0.2807071891 |
| H | 5.1143950805 | -5.4491745212 | -0.2057326383 |

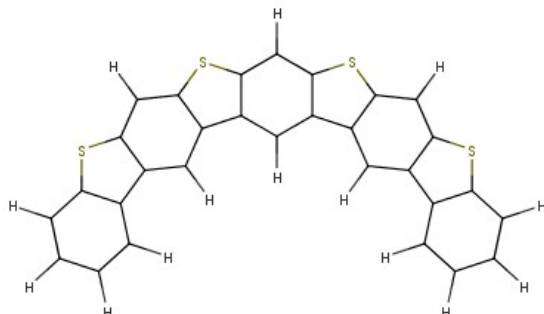

### Carb4S

48

|   |               |               |               |
|---|---------------|---------------|---------------|
| C | -5.8501031805 | 4.6644713476  | 0.1603176390  |
| C | -5.4035924645 | 3.3381087449  | 0.0907491640  |
| C | -4.0453829746 | 3.0501851122  | 0.0949789412  |
| C | -3.1107487810 | 4.0915181648  | 0.1695135839  |
| C | -3.5800401023 | 5.4194327859  | 0.2406923844  |
| C | -4.9427166901 | 5.7153529839  | 0.2359990969  |
| C | -1.6584569904 | 4.0189604743  | 0.1866799963  |
| C | -1.0626010907 | 5.3027659216  | 0.2723978148  |
| S | -2.2635963815 | 6.5953978947  | 0.3331331149  |
| C | -0.8419283885 | 2.8890685312  | 0.1308764565  |
| C | 0.5448262226  | 3.0315422317  | 0.1595473118  |
| C | 1.1045178527  | 4.3317874399  | 0.2436754287  |
| C | 0.3176023009  | 5.4765818099  | 0.3018052173  |
| C | 1.5675147703  | 1.9966554620  | 0.1149148157  |
| C | 2.8759707380  | 2.5392933062  | 0.1612363243  |
| S | 2.8711419157  | 4.3030384777  | 0.2631764171  |
| C | 1.4062630803  | 0.6127394254  | 0.0396397162  |
| C | 2.5266231529  | -0.2183351087 | 0.0126227808  |
| C | 3.8188107359  | 0.3627193624  | 0.0565095903  |
| C | 4.0118819628  | 1.7378012785  | 0.1305096229  |
| C | 2.5817144983  | -1.6719953060 | -0.0562048340 |
| C | 3.9153219854  | -2.1535833837 | -0.0665529307 |
| S | 5.1035981375  | -0.8485910351 | 0.0092240609  |
| C | 1.5285300572  | -2.5855665360 | -0.1076239831 |
| C | 1.7965662893  | -3.9540386667 | -0.1718709168 |
| C | 3.1440324817  | -4.3963784650 | -0.1818151146 |
| C | 4.2146340064  | -3.5096215734 | -0.1287605695 |
| C | 0.8589849905  | -5.0650245411 | -0.2387230186 |
| C | 1.5139011243  | -6.3129372820 | -0.2991138600 |
| S | 3.2734949125  | -6.1539681912 | -0.2706754841 |

|   |               |               |               |
|---|---------------|---------------|---------------|
| C | -0.5423673996 | -5.0416434369 | -0.2539524910 |
| C | -1.2545359554 | -6.2313959970 | -0.3292136093 |
| C | -0.5842934607 | -7.4605739507 | -0.3900077520 |
| C | 0.8048978851  | -7.5110109070 | -0.3748932746 |
| H | -6.9129372528 | 4.8762992481  | 0.1553997031  |
| H | -6.1242227144 | 2.5308068003  | 0.0333146397  |
| H | -3.7098614205 | 2.0206422700  | 0.0404009137  |
| H | -5.2896841689 | 6.7403746338  | 0.2904131821  |
| H | -1.2878884867 | 1.9030587616  | 0.0653978884  |
| H | 0.7613575662  | 6.4625986302  | 0.3663207545  |
| H | 0.4120301297  | 0.1817967978  | 0.0041137789  |
| H | 5.0057756770  | 2.1669742730  | 0.1637844106  |
| H | 0.5027949239  | -2.2344852335 | -0.0977738773 |
| H | 5.2391391685  | -3.8610735765 | -0.1365493868 |
| H | -1.0711294794 | -4.0962565734 | -0.2083790375 |
| H | -2.3379013052 | -6.2101588190 | -0.3423471213 |
| H | -1.1512427994 | -8.3822547282 | -0.4502476292 |
| H | 1.3235244301  | -8.4611885955 | -0.4226399178 |

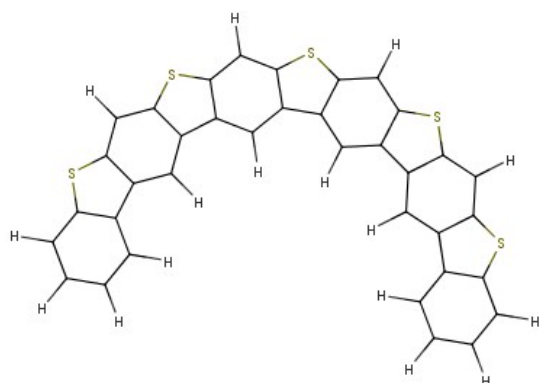

Carb5S

57

|   |               |              |              |
|---|---------------|--------------|--------------|
| C | -5.1268232331 | 5.7295992218 | 0.2079415007 |
| C | -4.6789744396 | 4.4048581516 | 0.1160063463 |
| C | -3.3204973159 | 4.1167194618 | 0.1288126772 |
| C | -2.3865036086 | 5.1563060979 | 0.2341546153 |
| C | -2.8576221708 | 6.4827084421 | 0.3250507361 |
| C | -4.2202272472 | 6.7786653168 | 0.3131098213 |
| C | -0.9338867192 | 5.0845964694 | 0.2682863264 |
| C | -0.3420890665 | 6.3681842822 | 0.3827008809 |
| S | -1.5443557263 | 7.6585119312 | 0.4516864238 |
| C | -0.1126995735 | 3.9575668391 | 0.2074888833 |
| C | 1.2736221960  | 4.1031691532 | 0.2599710942 |
| C | 1.8279459304  | 5.4037917532 | 0.3704566269 |
| C | 1.0368498868  | 6.5448675605 | 0.4335550727 |

|   |               |               |               |
|---|---------------|---------------|---------------|
| C | 2.3016136160  | 3.0727284175  | 0.2182097181  |
| C | 3.6069594038  | 3.6206449286  | 0.2912668262  |
| S | 3.5939459958  | 5.3824605994  | 0.4169405776  |
| C | 2.1498409090  | 1.6887646992  | 0.1239473112  |
| C | 3.2756111966  | 0.8643423677  | 0.1022383126  |
| C | 4.5640269323  | 1.4510487658  | 0.1706435035  |
| C | 4.7475073683  | 2.8258698665  | 0.2661832630  |
| C | 3.3399301600  | -0.5875316953 | 0.0177465826  |
| C | 4.6753238396  | -1.0622585709 | 0.0177651169  |
| S | 5.8562184866  | 0.2473816110  | 0.1231135800  |
| C | 2.2914732509  | -1.5056289397 | -0.0519617661 |
| C | 2.5659719565  | -2.8719143350 | -0.1213705718 |
| C | 3.9146827576  | -3.3078529424 | -0.1188993998 |
| C | 4.9805572884  | -2.4172715297 | -0.0511752324 |
| C | 1.6309825112  | -3.9852072737 | -0.1958706659 |
| C | 2.2952810415  | -5.2369123506 | -0.2425288438 |
| S | 4.0539623993  | -5.0670646294 | -0.2032358373 |
| C | 0.2368316617  | -3.9531359810 | -0.2249351806 |
| C | -0.4855446731 | -5.1451294714 | -0.2967021650 |
| C | 0.2142609099  | -6.3777833626 | -0.3379243635 |
| C | 1.6040682039  | -6.4409159785 | -0.3117003978 |
| C | -1.9270013702 | -5.3356864937 | -0.3387488042 |
| C | -2.2834491110 | -6.6986227701 | -0.4103545123 |
| S | -0.8736441336 | -7.7648246059 | -0.4265835363 |
| C | -2.9462764333 | -4.3740976773 | -0.3167983013 |
| C | -4.2757121525 | -4.7723904614 | -0.3651173082 |
| C | -4.6092667145 | -6.1317713969 | -0.4372027886 |
| C | -3.6164020905 | -7.1050475599 | -0.4606704015 |
| H | -6.1896418500 | 5.9416161774  | 0.1971159025  |
| H | -5.3994556426 | 3.5993850521  | 0.0344593078  |
| H | -2.9849683619 | 3.0881770989  | 0.0563922661  |
| H | -4.5675218837 | 7.8025473450  | 0.3851331116  |
| H | -0.5538491655 | 2.9709887216  | 0.1207404083  |
| H | 1.4762862231  | 7.5311147051  | 0.5185875839  |
| H | 1.1588773280  | 1.2522166241  | 0.0696057583  |
| H | 5.7380973817  | 3.2604324656  | 0.3194218332  |
| H | 1.2644692366  | -1.1583183088 | -0.0477925988 |
| H | 6.0064767657  | -2.7644074902 | -0.0494959114 |
| H | -0.2845409332 | -3.0032370224 | -0.1930516896 |
| H | 2.1258391877  | -7.3894155256 | -0.3444021657 |
| H | -2.6986706068 | -3.3199262525 | -0.2617362957 |
| H | -5.0624645798 | -4.0272671653 | -0.3471840031 |
| H | -5.6505398101 | -6.4299706754 | -0.4757205042 |
| H | -3.8748861453 | -8.1557442544 | -0.5178186895 |



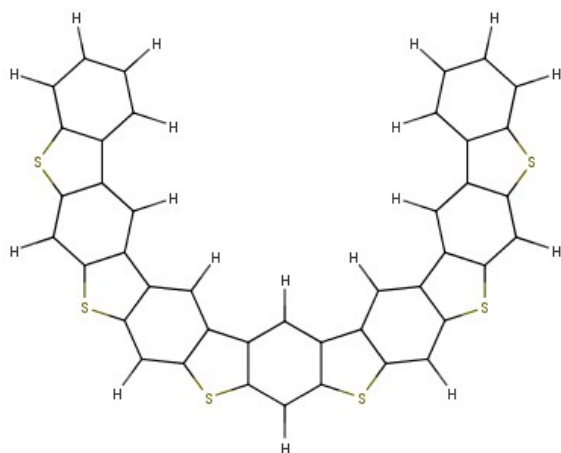

Carb6S

66

|   |               |               |               |
|---|---------------|---------------|---------------|
| C | -4.1354668152 | 6.1732095761  | -0.0382686795 |
| C | -3.6915792066 | 4.8481353478  | -0.1247191831 |
| C | -2.3409226670 | 4.5480184454  | -0.0208678066 |
| C | -1.4092294490 | 5.5762848452  | 0.1721828301  |
| C | -1.8770524559 | 6.9037684006  | 0.2566050025  |
| C | -3.2322337833 | 7.2109059514  | 0.1533597486  |
| C | 0.0367194173  | 5.4948385599  | 0.3029361417  |
| C | 0.6246067457  | 6.7727378972  | 0.4815208693  |
| S | -0.5708673303 | 8.0618997071  | 0.4955080226  |
| C | 0.8567495791  | 4.3666567680  | 0.2724160710  |
| C | 2.2370599670  | 4.5041984304  | 0.4144167509  |
| C | 2.7869626436  | 5.7997790632  | 0.5856817929  |
| C | 1.9968380065  | 6.9409655025  | 0.6246963371  |
| C | 3.2643743669  | 3.4733479491  | 0.4050178256  |
| C | 4.5640592974  | 4.0178663730  | 0.5573929435  |
| S | 4.5413150504  | 5.7693128027  | 0.7268914181  |
| C | 3.1188527026  | 2.0927101811  | 0.2710204705  |
| C | 4.2438980348  | 1.2681690427  | 0.2814428203  |
| C | 5.5270791950  | 1.8531075092  | 0.4223816362  |
| C | 5.7036170523  | 3.2233919843  | 0.5668533509  |
| C | 4.3157332082  | -0.1797811031 | 0.1568828941  |
| C | 5.6524587593  | -0.6496051086 | 0.1866382151  |
| S | 6.8163717881  | 0.6556111975  | 0.3844891069  |
| C | 3.2755599906  | -1.1000389349 | 0.0290238441  |
| C | 3.5585134362  | -2.4617809443 | -0.0758787155 |
| C | 4.9093487968  | -2.8902691528 | -0.0592225385 |
| C | 5.9663014086  | -1.9987117606 | 0.0764419766  |
| C | 2.6341305429  | -3.5775082706 | -0.2071068728 |
| C | 3.3099425924  | -4.8194185266 | -0.3021265897 |
| S | 5.0587870276  | -4.6366754590 | -0.2202813646 |
| C | 1.2398907174  | -3.5590501948 | -0.2358545328 |
| C | 0.5290586001  | -4.7522501856 | -0.3606522510 |

|   |               |               |               |
|---|---------------|---------------|---------------|
| C | 1.2417955203  | -5.9727264735 | -0.4650870993 |
| C | 2.6300423374  | -6.0237314196 | -0.4354603784 |
| C | -0.9108945093 | -4.9562742418 | -0.3952670530 |
| C | -1.2507490463 | -6.3257385399 | -0.5332248571 |
| S | 0.1708689975  | -7.3610663604 | -0.6189790734 |
| C | -1.9300657500 | -4.0095660417 | -0.3036853142 |
| C | -3.2639151326 | -4.4149754373 | -0.3482826942 |
| C | -3.5638246742 | -5.7929525112 | -0.4937840332 |
| C | -2.5690295918 | -6.7595505627 | -0.5875156007 |
| C | -4.4666247433 | -3.6035652619 | -0.2577194723 |
| C | -5.6405140405 | -4.3801624715 | -0.3403355927 |
| S | -5.2955456613 | -6.0978849215 | -0.5305697998 |
| C | -4.5882519159 | -2.2167564677 | -0.1031649163 |
| C | -5.8461524148 | -1.6357111484 | -0.0341011350 |
| C | -7.0000349249 | -2.4242301138 | -0.1195634278 |
| C | -6.9065193493 | -3.8015670238 | -0.2741378314 |
| H | -5.1939923002 | 6.3947361169  | -0.1219275713 |
| H | -4.4100774589 | 4.0498147104  | -0.2756645591 |
| H | -2.0103682814 | 3.5168558114  | -0.0915864324 |
| H | -3.5758749699 | 8.2372606974  | 0.2195735651  |
| H | 0.4193725715  | 3.3831198972  | 0.1370521132  |
| H | 2.4331022058  | 7.9243916275  | 0.7556612872  |
| H | 2.1307290823  | 1.6593302391  | 0.1580127936  |
| H | 6.6910937443  | 3.6562336793  | 0.6771406046  |
| H | 2.2462133893  | -0.7577213441 | 0.0132662528  |
| H | 6.9943338600  | -2.3413449724 | 0.0958581583  |
| H | 0.7091886375  | -2.6162414491 | -0.1568175287 |
| H | 3.1611121845  | -6.9656572732 | -0.5084758748 |
| H | -1.6867467949 | -2.9581455325 | -0.1934157228 |
| H | -2.8124324424 | -7.8102783321 | -0.6939079566 |
| H | -3.7015878966 | -1.5948125179 | -0.0356492471 |
| H | -5.9369931301 | -0.5617554401 | 0.0871728659  |
| H | -7.9777523916 | -1.9577517738 | -0.0645980388 |
| H | -7.8005640465 | -4.4117005830 | -0.3397278465 |

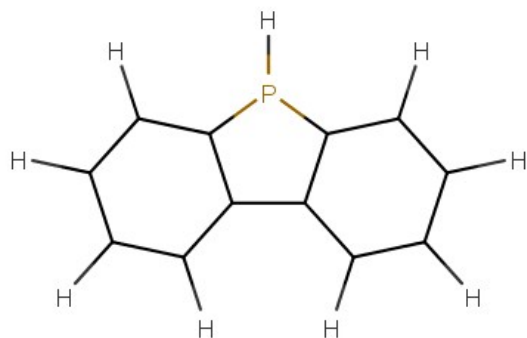

CarbP

22

|   |               |               |               |
|---|---------------|---------------|---------------|
| C | 3.3424565363  | -1.0580626846 | 0.1987914884  |
| C | 3.1710798065  | 0.2304235897  | -0.3142125983 |
| C | 1.8990755193  | 0.7846236006  | -0.4231406452 |
| C | 0.7812036510  | 0.0439729082  | -0.0246694276 |
| C | 0.9593878089  | -1.2582000841 | 0.4893429439  |
| C | 2.2367743123  | -1.8006187815 | 0.6118314520  |
| C | -0.6274160505 | 0.4619624237  | -0.0754266903 |
| C | -1.5197212402 | -0.5230826447 | 0.3989066671  |
| P | -0.6327269919 | -2.0071039733 | 1.0339546465  |
| C | -1.1325234338 | 1.6841529837  | -0.5318917854 |
| C | -2.5051346978 | 1.9138690597  | -0.5185537758 |
| C | -3.3841178105 | 0.9365587039  | -0.0441215411 |
| C | -2.8912188651 | -0.2801285939 | 0.4261902497  |
| H | 4.3378578457  | -1.4789827494 | 0.2825958768  |
| H | 4.0358900464  | 0.8055537967  | -0.6250573609 |
| H | 1.7805516944  | 1.7860595163  | -0.8212080286 |
| H | 2.3755838800  | -2.7934969441 | 1.0260138593  |
| H | -0.8437215448 | -2.8599977950 | -0.0907531487 |
| H | -0.4619204887 | 2.4527620722  | -0.8994481310 |
| H | -2.8943677207 | 2.8610606988  | -0.8744515124 |
| H | -4.4511298065 | 1.1274212613  | -0.0341673642 |
| H | -3.5757525607 | -1.0290363273 | 0.8099548106  |

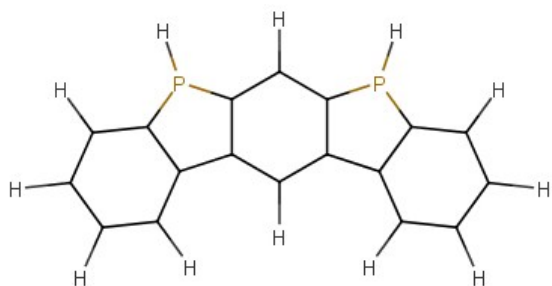

Carb2P

32

|   |               |               |               |
|---|---------------|---------------|---------------|
| C | -5.1604651876 | 1.0889571368  | -0.8944024875 |
| C | -4.1338417246 | 2.0356091035  | -0.8422268796 |
| C | -2.8223387515 | 1.6432800746  | -0.5914730412 |
| C | -2.5256717043 | 0.2894692070  | -0.4000209753 |
| C | -3.5654212583 | -0.6626888986 | -0.4582747109 |
| C | -4.8791492171 | -0.2615554887 | -0.6913844041 |
| C | -1.2060675881 | -0.3034714448 | -0.1364834279 |
| C | -1.2460160236 | -1.7097906280 | 0.0066787533  |
| P | -2.9645857661 | -2.3639251854 | -0.0876109076 |
| C | 0.0110255060  | 0.3728227497  | -0.0330783336 |
| C | 1.1827104823  | -0.3444667272 | 0.2147523321  |
| C | 1.1297501686  | -1.7495048824 | 0.3668311905  |
| C | -0.0810169751 | -2.4297801875 | 0.2604188755  |
| C | 2.5409963930  | 0.2016411667  | 0.3526043811  |
| C | 3.5168239431  | -0.7839915783 | 0.6125775439  |
| P | 2.8026911463  | -2.4816466770 | 0.6027987350  |
| C | 2.9284208060  | 1.5425922807  | 0.2547907709  |
| C | 4.2657846502  | 1.8901920418  | 0.4205407990  |
| C | 5.2282734607  | 0.9095927639  | 0.6746587290  |
| C | 4.8566352683  | -0.4315120167 | 0.7601192720  |
| H | -6.1794355133 | 1.4057108598  | -1.0854057516 |
| H | -4.3610853913 | 3.0848801567  | -0.9930652070 |
| H | -2.0373727099 | 2.3900534427  | -0.5485091120 |
| H | -5.6816612671 | -0.9910288576 | -0.7160827941 |
| H | -2.9177527258 | -2.8522238119 | -1.4278953591 |
| H | 0.0449457072  | 1.4505282055  | -0.1457375745 |
| H | -0.1164877820 | -3.5086146274 | 0.3731818091  |
| H | 2.7363101225  | -2.6740104994 | 2.0154731630  |
| H | 2.1945346251  | 2.3146948857  | 0.0521665518  |
| H | 4.5627594617  | 2.9301632643  | 0.3464636182  |
| H | 6.2680586948  | 1.1903094957  | 0.7973949022  |
| H | 5.6096394630  | -1.1913656273 | 0.9399195798  |

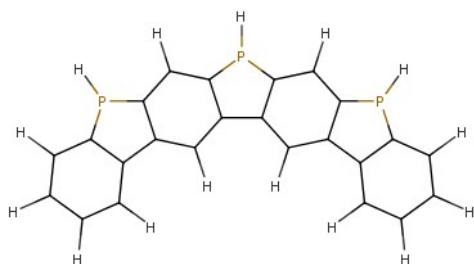

Carb3P

42

|   |               |               |               |
|---|---------------|---------------|---------------|
| C | -6.0423579501 | 2.7113517969  | 0.1534481602  |
| C | -5.4892312339 | 1.4283944568  | 0.1226569360  |
| C | -4.1100248631 | 1.2548984585  | 0.0579106177  |
| C | -3.2683097621 | 2.3724455073  | 0.0347588903  |
| C | -3.8320801892 | 3.6656073858  | 0.0648607110  |
| C | -5.2144762091 | 3.8325537920  | 0.1117720283  |
| C | -1.7986959176 | 2.3784985293  | -0.0152739867 |
| C | -1.2471235992 | 3.6805895078  | -0.0305276235 |
| P | -2.5501063485 | 4.9805866623  | -0.0781886905 |
| C | -0.9570641420 | 1.2656807515  | -0.0508290109 |
| C | 0.4269163740  | 1.4450306369  | -0.0875026928 |
| C | 0.9678768754  | 2.7513916455  | -0.1026543072 |
| C | 0.1316623114  | 3.8652879748  | -0.1009937446 |
| C | 1.4523062720  | 0.3921583258  | -0.1237937192 |
| C | 2.7715633906  | 0.8993292462  | -0.1645590573 |
| P | 2.8027023917  | 2.7379794369  | -0.2561719834 |
| C | 1.2364601244  | -0.9871165054 | -0.1322135997 |
| C | 2.3266035717  | -1.8580664808 | -0.1651559581 |
| C | 3.6418974553  | -1.3402539895 | -0.2044940754 |
| C | 3.8617846454  | 0.0349473584  | -0.2309027156 |
| C | 2.2827513469  | -3.3277873241 | -0.1717913378 |
| C | 3.5602460151  | -3.9257445950 | -0.2119530497 |
| P | 4.9040183519  | -2.6728095041 | -0.3476590622 |
| C | 1.1441154830  | -4.1402913755 | -0.1404672470 |
| C | 1.2815633733  | -5.5250200433 | -0.1392760249 |
| C | 2.5490511562  | -6.1121492932 | -0.1801613868 |
| C | 3.6905023219  | -5.3127531369 | -0.2287182568 |
| H | -7.1181433529 | 2.8357891679  | 0.2016938308  |
| H | -6.1393000858 | 0.5609174843  | 0.1444823591  |
| H | -3.6957812898 | 0.2532413317  | 0.0283482088  |
| H | -5.6496269904 | 4.8261774499  | 0.1174948122  |
| H | -2.5025360218 | 5.3600454204  | 1.2969126941  |
| H | -1.3798739076 | 0.2673182309  | -0.0456579018 |
| H | 0.5498118583  | 4.8653905390  | -0.1537544983 |
| H | 3.1180057900  | 2.9995538316  | 1.1114525675  |
| H | 0.2273766690  | -1.3831508827 | -0.1107366851 |

|   |              |               |               |
|---|--------------|---------------|---------------|
| H | 4.8705600014 | 0.4286593107  | -0.3033510544 |
| H | 5.3284001000 | -2.6922693189 | 1.0149517930  |
| H | 0.1540682002 | -3.6988867251 | -0.1145114632 |
| H | 0.3978261955 | -6.1525180820 | -0.1112010249 |
| H | 2.6453322260 | -7.1918862564 | -0.1813477624 |
| H | 4.6714297041 | -5.7733104403 | -0.2770059011 |

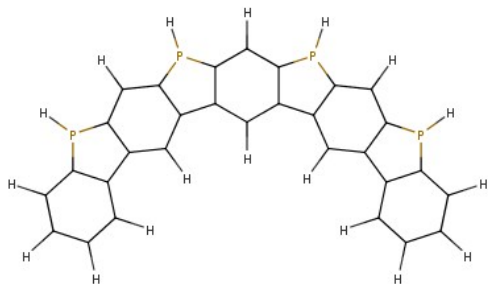

### Carb4P

52

|   |               |               |               |
|---|---------------|---------------|---------------|
| C | -6.0209338836 | 4.0282930438  | 0.2182805343  |
| C | -5.4211159411 | 2.7689789263  | 0.1334657461  |
| C | -4.0359729217 | 2.6483465826  | 0.0796513362  |
| C | -3.2351248796 | 3.7947077727  | 0.1206928179  |
| C | -3.8457669463 | 5.0639955148  | 0.2062974253  |
| C | -5.2338763687 | 5.1789389634  | 0.2427761617  |
| C | -1.7662593476 | 3.8537676223  | 0.0905547216  |
| C | -1.2618630928 | 5.1736508618  | 0.1478296776  |
| P | -2.6095766902 | 6.4279735376  | 0.1389918343  |
| C | -0.8842797493 | 2.7744486912  | 0.0146055593  |
| C | 0.4927677464  | 3.0046655025  | 0.0141557172  |
| C | 0.9862473984  | 4.3284717234  | 0.0718887015  |
| C | 0.1102024069  | 5.4106426711  | 0.1114326172  |
| C | 1.5565783599  | 1.9916216731  | -0.0451079253 |
| C | 2.8572386798  | 2.5466394457  | -0.0326726204 |
| P | 2.8221276279  | 4.3874811621  | -0.0485607323 |
| C | 1.3923444827  | 0.6072194230  | -0.1139192606 |
| C | 2.5143008214  | -0.2223496761 | -0.1518551266 |
| C | 3.8103645428  | 0.3432860188  | -0.1405251769 |
| C | 3.9797917133  | 1.7253439781  | -0.1065142250 |
| C | 2.5224795093  | -1.6915112975 | -0.2120225546 |
| C | 3.8249464472  | -2.2401193387 | -0.2517205341 |
| P | 5.1232852656  | -0.9359573927 | -0.3118084944 |
| C | 1.4102337570  | -2.5352034895 | -0.2354188463 |
| C | 1.5913582583  | -3.9184974321 | -0.2826506200 |
| C | 2.8988821734  | -4.4563173774 | -0.3233070818 |
| C | 4.0110222258  | -3.6179229450 | -0.3342224058 |
| C | 0.5417391742  | -4.9481945964 | -0.2985654671 |

|   |               |               |               |
|---|---------------|---------------|---------------|
| C | 1.0491795481  | -6.2640474828 | -0.3473954365 |
| P | 2.8854230312  | -6.2900758342 | -0.4865156587 |
| C | -0.8425227464 | -4.7471877579 | -0.2675625026 |
| C | -1.7016512378 | -5.8418924698 | -0.2776919531 |
| C | -1.1937065486 | -7.1425933146 | -0.3280340818 |
| C | 0.1833953198  | -7.3553537142 | -0.3745272775 |
| H | -7.1011284500 | 4.1115679736  | 0.2558567980  |
| H | -6.0394928330 | 1.8790379364  | 0.1035335086  |
| H | -3.5845860092 | 1.6651138243  | 0.0083454498  |
| H | -5.7049180842 | 6.1548977020  | 0.2901637917  |
| H | -2.5914275009 | 6.7508666962  | 1.5290166419  |
| H | -1.2686504219 | 1.7619330790  | -0.0383937533 |
| H | 0.4928460285  | 6.4262319752  | 0.1154734425  |
| H | 3.1079565710  | 4.6048033917  | 1.3331110325  |
| H | 0.3979409305  | 0.1756114199  | -0.1349037121 |
| H | 4.9749352315  | 2.1573938590  | -0.1369031233 |
| H | 5.5273739726  | -0.9936927443 | 1.0560655448  |
| H | 0.4105109535  | -2.1160852628 | -0.2111427478 |
| H | 5.0112364423  | -4.0332319108 | -0.4038806608 |
| H | 3.1835154600  | -6.6133836030 | 0.8712691587  |
| H | -1.2541253427 | -3.7444759772 | -0.2340635167 |
| H | -2.7737731789 | -5.6831059488 | -0.2526320185 |
| H | -1.8718540944 | -7.9882961078 | -0.3399169290 |
| H | 0.5722323401  | -8.3664445563 | -0.4307140547 |

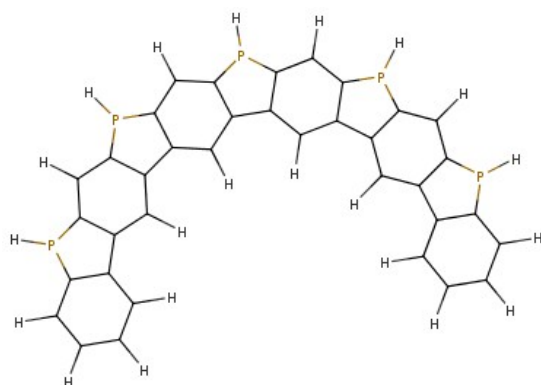

Carb5P

62

|   |               |               |               |
|---|---------------|---------------|---------------|
| C | -5.4154903363 | 4.6406924691  | 0.2015499184  |
| C | -4.7383961287 | 3.4202701040  | 0.1315434327  |
| C | -3.3476864295 | 3.3847005690  | 0.1161879585  |
| C | -2.6201223454 | 4.5780835646  | 0.1822199673  |
| C | -3.3079717436 | 5.8075223781  | 0.2581181813  |
| C | -4.7013008180 | 5.8373399811  | 0.2533626561  |
| C | -1.1581712039 | 4.7259823076  | 0.1857270369  |
| C | -0.7314177867 | 6.0719447648  | 0.2664250214  |
| P | -2.1526026830 | 7.2436582229  | 0.2407473049  |
| C | -0.2148346797 | 3.7014572283  | 0.1135048631  |
| C | 1.1454801356  | 4.0114040083  | 0.1397520081  |
| C | 1.5648662002  | 5.3585391073  | 0.2224410413  |
| C | 0.6261467806  | 6.3881411226  | 0.2591541834  |
| C | 2.2598217865  | 3.0574363752  | 0.0848700218  |
| C | 3.5314387393  | 3.6736464345  | 0.1262295354  |
| P | 3.3994203667  | 5.5120306020  | 0.1318344795  |
| C | 2.1603440402  | 1.6696292337  | -0.0029189206 |
| C | 3.3190100402  | 0.8945855870  | -0.0290870224 |
| C | 4.5878588983  | 1.5159608202  | 0.0138990265  |
| C | 4.6927228128  | 2.9049023669  | 0.0652141218  |
| C | 3.3872427775  | -0.5695583142 | -0.1025321303 |
| C | 4.7089165156  | -1.0697833323 | -0.1135063896 |
| P | 5.9546023778  | 0.2885076385  | -0.1379599542 |
| C | 2.3067689145  | -1.4490182473 | -0.1638066921 |
| C | 2.5378406123  | -2.8228784782 | -0.2193028331 |
| C | 3.8619729296  | -3.3177347746 | -0.2260755762 |
| C | 4.9452768409  | -2.4408306824 | -0.1993184536 |
| C | 1.5189179966  | -3.8777665507 | -0.2828236791 |
| C | 2.0635406038  | -5.1808858289 | -0.3347497548 |
| P | 3.9057336854  | -5.1514144711 | -0.4064469943 |
| C | 0.1357320516  | -3.6967428634 | -0.3067455243 |
| C | -0.7057180970 | -4.8070729076 | -0.3686905979 |
| C | -0.1540315624 | -6.1080349043 | -0.4221061187 |
| C | 1.2276126039  | -6.2922324508 | -0.4290677158 |
| C | -2.1748771834 | -4.7948975385 | -0.4008456963 |



|   |               |               |               |
|---|---------------|---------------|---------------|
| C | -2.7437998024 | -6.0831756321 | -0.4827761749 |
| P | -1.4565347289 | -7.3964436564 | -0.6153311929 |
| C | -3.0105640109 | -3.6733745953 | -0.3620665386 |
| C | -4.3915043648 | -3.8378279780 | -0.4020946331 |
| C | -4.9508781308 | -5.1153442478 | -0.4908741701 |
| C | -4.1274276996 | -6.2397230389 | -0.5419909836 |
| H | -6.4993333989 | 4.6577528894  | 0.2072793067  |
| H | -5.3001208968 | 2.4942326577  | 0.0827623043  |
| H | -2.8362137809 | 2.4304604520  | 0.0561103251  |
| H | -5.2336418736 | 6.7816947440  | 0.2900434417  |
| H | -2.1862026785 | 7.5423465822  | 1.6359394903  |
| H | -0.5359227887 | 2.6688134287  | 0.0387612711  |
| H | 0.9486231682  | 7.4240548867  | 0.2842015400  |
| H | 3.6547639783  | 5.7239638294  | 1.5200995132  |
| H | 1.1867048859  | 1.1951104410  | -0.0440387988 |
| H | 5.6674925267  | 3.3817781421  | 0.0601470051  |
| H | 6.3303101418  | 0.2385538500  | 1.2379111433  |
| H | 1.2924641096  | -1.0663103466 | -0.1645090222 |
| H | 5.9608816625  | -2.8208041685 | -0.2434372530 |
| H | 4.1661708804  | -5.4766704377 | 0.9588346182  |
| H | -0.2862688398 | -2.6985287086 | -0.2782301760 |
| H | 1.6479626055  | -7.2897366546 | -0.5070763881 |
| H | -1.4915554974 | -7.8456884352 | 0.7387878949  |
| H | -2.5901604312 | -2.6758062321 | -0.2992838700 |
| H | -5.0376055722 | -2.9677024941 | -0.3708767818 |
| H | -6.0279394964 | -5.2323019415 | -0.5280494284 |
| H | -4.5681961175 | -7.2271072458 | -0.6272194071 |

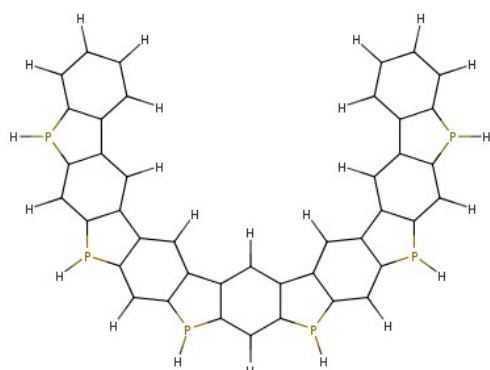

Carb6P

72

|   |               |              |              |
|---|---------------|--------------|--------------|
| C | -4.6373377684 | 4.9150174439 | 0.4258782436 |
| C | -3.9415328483 | 3.7033920181 | 0.4225473423 |
| C | -2.5519273045 | 3.6858568136 | 0.3557352336 |
| C | -1.8423291098 | 4.8905366849 | 0.3083534013 |
| C | -2.5496060937 | 6.1114248873 | 0.3227154385 |

|   |               |               |               |
|---|---------------|---------------|---------------|
| C | -3.9420290726 | 6.1217802744  | 0.3643062691  |
| C | -0.3830728400 | 5.0620020263  | 0.2615505937  |
| C | 0.0171381344  | 6.4186555256  | 0.2603145861  |
| P | -1.4234892421 | 7.5619593275  | 0.1836584742  |
| C | 0.5803881296  | 4.0527734582  | 0.2208694081  |
| C | 1.9352716385  | 4.3894167900  | 0.2090721616  |
| C | 2.3245474651  | 5.7488083889  | 0.2292178607  |
| C | 1.3670230704  | 6.7602178827  | 0.2236123880  |
| C | 3.0747991364  | 3.4606677924  | 0.1759425810  |
| C | 4.3279617495  | 4.1156630516  | 0.2001987756  |
| P | 4.1524246005  | 5.9470599426  | 0.1374366528  |
| C | 3.0193448345  | 2.0670884898  | 0.1105957708  |
| C | 4.2025060799  | 1.3263685803  | 0.0937555962  |
| C | 5.4498857042  | 1.9916996073  | 0.1371781088  |
| C | 5.5115661482  | 3.3827159099  | 0.1623485881  |
| C | 4.3278233829  | -0.1373642644 | 0.0237370105  |
| C | 5.6705606734  | -0.5812481212 | 0.0348802209  |
| P | 6.8643001635  | 0.8196565980  | 0.0180171653  |
| C | 3.2893667585  | -1.0668074915 | -0.0633333126 |
| C | 3.5830874044  | -2.4309360366 | -0.1167404568 |
| C | 4.9293460962  | -2.8633504431 | -0.0899509708 |
| C | 5.9700206874  | -1.9391691882 | -0.0422228363 |
| C | 2.6206952656  | -3.5397390350 | -0.2059877408 |
| C | 3.2380024026  | -4.8121034717 | -0.2267468161 |
| P | 5.0743274989  | -4.6904480129 | -0.2573233822 |
| C | 1.2297309566  | -3.4414905281 | -0.2772963200 |
| C | 0.4550093206  | -4.6012846431 | -0.3401631284 |
| C | 1.0832675486  | -5.8684360344 | -0.3432579281 |
| C | 2.4716264719  | -5.9714089201 | -0.3162515767 |
| C | -1.0121256322 | -4.6815030531 | -0.4072385995 |
| C | -1.4954090615 | -6.0101563440 | -0.4357893725 |
| P | -0.1305173988 | -7.2425013320 | -0.5086300476 |
| C | -1.9109164854 | -3.6136599660 | -0.4529702734 |
| C | -3.2833271634 | -3.8654681187 | -0.5006619300 |
| C | -3.7555789498 | -5.1985081683 | -0.5083764671 |
| C | -2.8625237203 | -6.2670367022 | -0.5054971527 |
| C | -4.3643046054 | -2.8697820718 | -0.5522887812 |
| C | -5.6533576547 | -3.4435290972 | -0.5763607214 |
| P | -5.5888279628 | -5.2827796439 | -0.6533410588 |
| C | -4.2328028877 | -1.4774776501 | -0.5872217989 |
| C | -5.3691056750 | -0.6756261199 | -0.6346181468 |
| C | -6.6431352353 | -1.2488912201 | -0.6519374037 |
| C | -6.7865276723 | -2.6353731791 | -0.6349856822 |
| H | -5.7202313434 | 4.9174190122  | 0.4729667528  |
| H | -4.4883774262 | 2.7688173686  | 0.4734725887  |
| H | -2.0259008300 | 2.7378076846  | 0.3513811544  |
| H | -4.4866328645 | 7.0597518189  | 0.3524723201  |
| H | -1.4415827118 | 7.9551051246  | 1.5552330651  |
| H | 0.2799397734  | 3.0112354696  | 0.2060318366  |

|   |               |               |               |
|---|---------------|---------------|---------------|
| H | 1.6695009937  | 7.8019879668  | 0.1903256405  |
| H | 4.3889159520  | 6.2205787354  | 1.5184378808  |
| H | 2.0603418478  | 1.5627074196  | 0.0744291652  |
| H | 6.4707516464  | 3.8901396840  | 0.1466249413  |
| H | 7.2195700367  | 0.7982226669  | 1.4003613918  |
| H | 2.2583092924  | -0.7322529892 | -0.0870687045 |
| H | 7.0022401392  | -2.2732954202 | -0.0701394130 |
| H | 5.3182116246  | -4.9958134224 | 1.1155922133  |
| H | 0.7517872934  | -2.4682941277 | -0.2783386673 |
| H | 2.9509216667  | -6.9438205608 | -0.3663210091 |
| H | -0.1519751725 | -7.6499003144 | 0.8591546925  |
| H | -1.5449991276 | -2.5929348116 | -0.4486193340 |
| H | -3.2274026421 | -7.2877240727 | -0.5609666528 |
| H | -5.8801027348 | -5.5494869930 | 0.7182158586  |
| H | -3.2510332497 | -1.0171189319 | -0.5824966661 |
| H | -5.2642392597 | 0.4027565703  | -0.6698089960 |
| H | -7.5217075001 | -0.6152227582 | -0.6915931284 |
| H | -7.7763620343 | -3.0774364694 | -0.6721470522 |

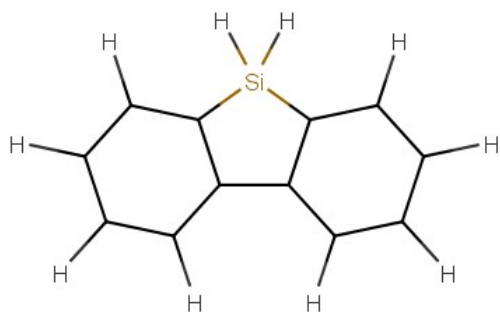

CarbSi

23

|    |               |               |               |
|----|---------------|---------------|---------------|
| C  | 3.4847108947  | -0.4353009525 | 0.4342545251  |
| C  | 3.0832663445  | 0.9002781184  | 0.4531350260  |
| C  | 1.7406237034  | 1.2379773596  | 0.2964772196  |
| C  | 0.7824449497  | 0.2357179607  | 0.1176860623  |
| C  | 1.1869619805  | -1.1214683648 | 0.0989982643  |
| C  | 2.5347253470  | -1.4425769003 | 0.2576835745  |
| C  | -0.6758446198 | 0.4703055702  | -0.0626889973 |
| C  | -1.4625427386 | -0.6961281675 | -0.2257242320 |
| Si | -0.3325673919 | -2.1952955999 | -0.1567074989 |
| C  | -1.2919926570 | 1.7253311816  | -0.0818394809 |
| C  | -2.6703947056 | 1.8232184284  | -0.2594249418 |
| C  | -3.4477699747 | 0.6763389960  | -0.4198086781 |
| C  | -2.8409062515 | -0.5805602741 | -0.4026188106 |
| H  | 4.5315411332  | -0.6893457422 | 0.5568344823  |
| H  | 3.8196772744  | 1.6843776984  | 0.5904979693  |
| H  | 1.4508410854  | 2.2822837274  | 0.3145806802  |
| H  | 2.8568941611  | -2.4790280400 | 0.2453875963  |
| H  | -0.6192192876 | -3.1225663754 | 0.9694104301  |
| H  | -0.3085020274 | -2.9984563095 | -1.4073617160 |
| H  | -0.7078368683 | 2.6302392238  | 0.0404559136  |
| H  | -3.1400776550 | 2.8006070519  | -0.2725476253 |
| H  | -4.5197729466 | 0.7616206685  | -0.5574675971 |
| H  | -3.4539598348 | -1.4671591381 | -0.5299221919 |

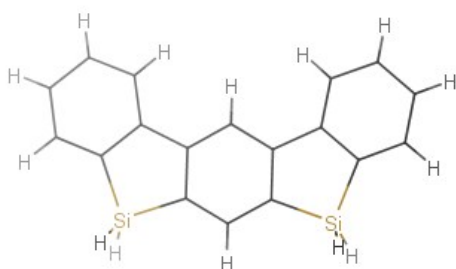

Carb2Si

34

|    |               |               |               |
|----|---------------|---------------|---------------|
| C  | -5.0605929255 | 1.4488229033  | -1.0017286795 |
| C  | -3.9628720752 | 2.3048751107  | -0.9179672554 |
| C  | -2.6923742561 | 1.8015425777  | -0.6479124541 |
| C  | -2.5083128150 | 0.4286092013  | -0.4582428142 |
| C  | -3.6210755794 | -0.4434392019 | -0.5433835179 |
| C  | -4.8864145742 | 0.0769644359  | -0.8142371622 |
| C  | -1.2044763450 | -0.2270650798 | -0.1674191820 |
| C  | -1.2536882769 | -1.6349582505 | -0.0188843423 |
| Si | -3.0298025115 | -2.2033566785 | -0.2491323985 |
| C  | 0.0128485719  | 0.4466441617  | -0.0406781366 |
| C  | 1.1851224799  | -0.2627245791 | 0.2299152219  |
| C  | 1.1418546506  | -1.6711501794 | 0.3797636400  |
| C  | -0.0782868264 | -2.3369913589 | 0.2531049087  |
| C  | 2.5322339336  | 0.3519968630  | 0.3800293448  |
| C  | 3.5854021967  | -0.5551515503 | 0.6517991452  |
| Si | 2.8779632564  | -2.2944118807 | 0.7317612730  |
| C  | 2.8111800945  | 1.7181628085  | 0.2720113829  |
| C  | 4.1159476413  | 2.1792003758  | 0.4316295507  |
| C  | 5.1545577145  | 1.2881364157  | 0.7001533500  |
| C  | 4.8857437691  | -0.0768484471 | 0.8095137040  |
| H  | -6.0461249275 | 1.8488104631  | -1.2123157883 |
| H  | -4.0962898609 | 3.3709733305  | -1.0643484017 |
| H  | -1.8532408628 | 2.4849441103  | -0.5876976302 |
| H  | -5.7462855262 | -0.5817219070 | -0.8820543830 |
| H  | -3.6252351362 | -2.8498518170 | 0.9505267132  |
| H  | -3.2360358833 | -3.1129336436 | -1.4074655803 |
| H  | 0.0471318930  | 1.5234942210  | -0.1530793312 |
| H  | -0.1140486151 | -3.4167409272 | 0.3673279637  |
| H  | 3.4192395058  | -3.2166646346 | -0.3016081261 |
| H  | 3.0358481102  | -2.9503647962 | 2.0571235315  |
| H  | 2.0195212471  | 2.4289009380  | 0.0646080946  |
| H  | 4.3231627533  | 3.2401147481  | 0.3458722167  |
| H  | 6.1671598914  | 1.6553846603  | 0.8238775643  |

H 5.7000293292 -0.7631026563 1.0189276201

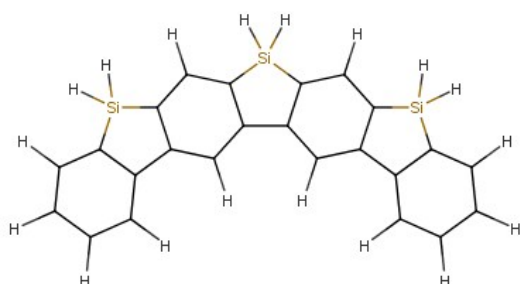

Carb3Si

45

|    |               |               |               |
|----|---------------|---------------|---------------|
| C  | -6.1369910162 | 2.1536884096  | -0.0010722592 |
| C  | -5.4295200569 | 0.9529320837  | -0.0499033560 |
| C  | -4.0367497330 | 0.9510437135  | -0.0292422175 |
| C  | -3.3352262603 | 2.1586284770  | 0.0411694316  |
| C  | -4.0514139631 | 3.3795014673  | 0.0903560981  |
| C  | -5.4455158743 | 3.3638312185  | 0.0685038298  |
| C  | -1.8529160211 | 2.2865038326  | 0.0773805755  |
| C  | -1.3618167850 | 3.6128913005  | 0.1636234385  |
| Si | -2.8207547127 | 4.7955195984  | 0.1867863447  |
| C  | -0.9606245532 | 1.2129343486  | 0.0352576570  |
| C  | 0.4167187704  | 1.4405579625  | 0.0844222041  |
| C  | 0.9129086348  | 2.7643457952  | 0.1760354123  |
| C  | 0.0155980926  | 3.8326513566  | 0.2123354716  |
| C  | 1.4536231601  | 0.3733369297  | 0.0499228738  |
| C  | 2.7933162693  | 0.8288222633  | 0.1167420532  |
| Si | 2.7888030190  | 2.7033519945  | 0.2301632199  |
| C  | 1.1845396443  | -0.9945656981 | -0.0408681190 |
| C  | 2.2324522001  | -1.9175064831 | -0.0625621986 |
| C  | 3.5743361832  | -1.4670665932 | 0.0045168211  |
| C  | 3.8356207195  | -0.0989205698 | 0.0926718478  |
| C  | 2.0607340684  | -3.3932435488 | -0.1521174287 |
| C  | 3.2615177998  | -4.1442892592 | -0.1569259263 |
| Si | 4.7141444660  | -2.9581492174 | -0.0479432992 |
| C  | 0.8325616285  | -4.0577755354 | -0.2266165011 |
| C  | 0.7948829177  | -5.4481292479 | -0.3038559630 |
| C  | 1.9757798066  | -6.1898266156 | -0.3076710096 |
| C  | 3.2061045389  | -5.5353334577 | -0.2345600222 |
| H  | -7.2210317036 | 2.1463108353  | -0.0161952671 |
| H  | -5.9656187401 | 0.0118157507  | -0.1030418823 |
| H  | -3.5075240790 | 0.0057857934  | -0.0660842158 |
| H  | -6.0043673926 | 4.2934463405  | 0.1068976747  |
| H  | -2.9293947652 | 5.6121262268  | 1.4247302042  |
| H  | -2.8702346088 | 5.7219054185  | -0.9756675652 |

|   |               |               |               |
|---|---------------|---------------|---------------|
| H | -1.3401087812 | 0.2005589638  | -0.0364121109 |
| H | 0.3949886245  | 4.8485921135  | 0.2796779192  |
| H | 3.3795462053  | 3.2395269026  | 1.4852283283  |
| H | 3.4535080560  | 3.3835254312  | -0.9131874789 |
| H | 0.1598223305  | -1.3421543822 | -0.0962139405 |
| H | 4.8636357418  | 0.2491586180  | 0.1440242406  |
| H | 5.5498011855  | -3.1318850987 | 1.1697988390  |
| H | 5.6172292424  | -2.9947435125 | -1.2289971267 |
| H | -0.0980425950 | -3.5018229533 | -0.2246114449 |
| H | -0.1617881908 | -5.9555902512 | -0.3605789884 |
| H | 1.9375399680  | -7.2717016198 | -0.3671434530 |
| H | 4.1200266217  | -6.1207688028 | -0.2387727334 |

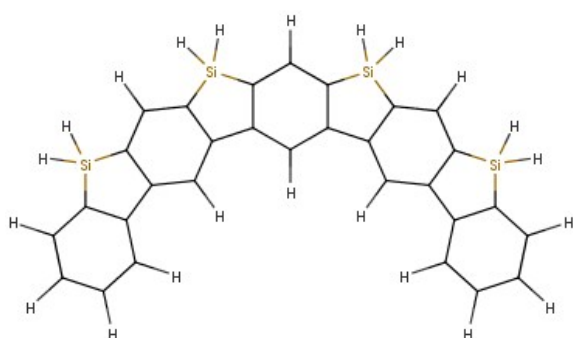

Carb4Si

56

|    |               |               |               |
|----|---------------|---------------|---------------|
| C  | -6.1072867757 | 3.2049548823  | 0.0126313213  |
| C  | -5.3116228572 | 2.0600262672  | -0.0289312096 |
| C  | -3.9228279647 | 2.1613048309  | 0.0148347247  |
| C  | -3.3144918445 | 3.4175138008  | 0.1004099603  |
| C  | -4.1199295325 | 4.5815606411  | 0.1395635502  |
| C  | -5.5083209393 | 4.4627979281  | 0.0962102308  |
| C  | -1.8469114640 | 3.6572043519  | 0.1546510588  |
| C  | -1.4568882766 | 5.0171615740  | 0.2324052632  |
| Si | -2.9999489470 | 6.0868304015  | 0.2384220459  |
| C  | -0.8772256858 | 2.6527740865  | 0.1335204211  |
| C  | 0.4788646729  | 2.9827058338  | 0.1889585824  |
| C  | 0.8741281732  | 4.3405913739  | 0.2685400619  |
| C  | -0.1003005516 | 5.3394201506  | 0.2883747457  |
| C  | 1.5929996635  | 1.9959569621  | 0.1732377045  |
| C  | 2.8938313737  | 2.5515947619  | 0.2524229026  |
| Si | 2.7487122270  | 4.4217269412  | 0.3393518387  |
| C  | 1.4295660384  | 0.6114191640  | 0.0862561371  |
| C  | 2.5442986770  | -0.2303765833 | 0.0811765887  |

|    |               |               |               |
|----|---------------|---------------|---------------|
| C  | 3.8468957914  | 0.3205723228  | 0.1655232796  |
| C  | 4.0026912248  | 1.7046589114  | 0.2488528575  |
| C  | 2.4878299953  | -1.7154038409 | -0.0081270374 |
| C  | 3.7438629109  | -2.3705055524 | 0.0077870653  |
| Si | 5.0996035998  | -1.0788120847 | 0.1350488236  |
| C  | 1.3122088896  | -2.4640625074 | -0.1022694570 |
| C  | 1.3689418014  | -3.8574939344 | -0.1800200906 |
| C  | 2.6227798757  | -4.5171782544 | -0.1570495803 |
| C  | 3.7929743305  | -3.7630315477 | -0.0649505392 |
| C  | 0.1834584439  | -4.7507400467 | -0.2902557839 |
| C  | 0.4721678647  | -6.1362181203 | -0.3472405642 |
| Si | 2.3340235225  | -6.3699186838 | -0.2634056026 |
| C  | -1.1464164107 | -4.3220108643 | -0.3426447296 |
| C  | -2.1769298383 | -5.2537843467 | -0.4484788913 |
| C  | -1.8950783738 | -6.6189618129 | -0.5016945935 |
| C  | -0.5706717734 | -7.0556514843 | -0.4506295091 |
| H  | -7.1873501748 | 3.1172990438  | -0.0204459660 |
| H  | -5.7757379768 | 1.0821970616  | -0.0956480835 |
| H  | -3.3243772468 | 1.2579602766  | -0.0188674661 |
| H  | -6.1343919386 | 5.3487569187  | 0.1270104538  |
| H  | -3.1780874843 | 6.8990586056  | 1.4706271772  |
| H  | -3.1119032682 | 7.0021296188  | -0.9277280059 |
| H  | -1.1785103052 | 1.6140847227  | 0.0739117726  |
| H  | 0.2023532351  | 6.3809477058  | 0.3496885553  |
| H  | 3.2870742431  | 5.0206497923  | 1.5886340100  |
| H  | 3.3713896797  | 5.1315961592  | -0.8087523826 |
| H  | 0.4343317996  | 0.1882545335  | 0.0218937745  |
| H  | 5.0010549306  | 2.1282747451  | 0.3097093264  |
| H  | 5.9293073885  | -1.1822216039 | 1.3639595347  |
| H  | 6.0202469841  | -1.0467446996 | -1.0317093071 |
| H  | 0.3514767884  | -1.9637768594 | -0.1151293990 |
| H  | 4.7557602335  | -4.2657526933 | -0.0499745075 |
| H  | 2.7974332055  | -7.1288201050 | 0.9279059888  |
| H  | 2.9195687714  | -7.0146259439 | -1.4680362531 |
| H  | -1.3872657996 | -3.2659188325 | -0.3032620229 |
| H  | -3.2055944605 | -4.9132565063 | -0.4904982178 |
| H  | -2.7027598376 | -7.3375660269 | -0.5832875737 |
| H  | -0.3589952182 | -8.1192704053 | -0.4926929364 |



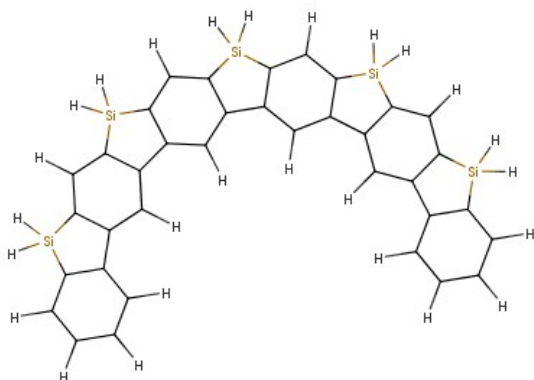

Carb5Si

67

|    |               |               |               |
|----|---------------|---------------|---------------|
| C  | -5.5079412970 | 3.5977129423  | 0.0287659441  |
| C  | -4.6237754429 | 2.5191858288  | 0.0218582800  |
| C  | -3.2483795330 | 2.7315323020  | 0.0811371227  |
| C  | -2.7423795121 | 4.0329518706  | 0.1488073606  |
| C  | -3.6375413659 | 5.1302110941  | 0.1594771232  |
| C  | -5.0115681369 | 4.9002588345  | 0.0984391569  |
| C  | -1.2984646730 | 4.3868950251  | 0.2084024724  |
| C  | -1.0162262369 | 5.7737987040  | 0.2712814869  |
| Si | -2.6392600512 | 6.7207380621  | 0.2598997308  |
| C  | -0.2526296497 | 3.4617016195  | 0.2018685672  |
| C  | 1.0729817851  | 3.8976399422  | 0.2547090631  |
| C  | 1.3619563219  | 5.2831236354  | 0.3187321435  |
| C  | 0.3110640608  | 6.2018816541  | 0.3265756188  |
| C  | 2.2592516461  | 3.0000014231  | 0.2524913866  |
| C  | 3.5139744897  | 3.6537548947  | 0.3234453265  |
| Si | 3.2256431461  | 5.5097236022  | 0.3881031313  |
| C  | 2.2008825203  | 1.6064605293  | 0.1876487349  |
| C  | 3.3755858822  | 0.8516277536  | 0.1971833373  |
| C  | 4.6331148793  | 1.4988573298  | 0.2760167931  |
| C  | 4.6838429035  | 2.8924654323  | 0.3358052494  |
| C  | 3.4262392535  | -0.6333516141 | 0.1306641043  |
| C  | 4.7250738679  | -1.1974008775 | 0.1681051315  |
| Si | 5.9841994568  | 0.1930467371  | 0.2890054853  |
| C  | 2.3069692237  | -1.4625391766 | 0.0343694466  |
| C  | 2.4612962566  | -2.8487358319 | -0.0254191261 |
| C  | 3.7571299710  | -3.4197302833 | 0.0170810901  |
| C  | 4.8713836195  | -2.5844588473 | 0.1124785915  |
| C  | 1.3400119219  | -3.8200181987 | -0.1346388200 |
| C  | 1.7218327279  | -5.1833861117 | -0.1719932456 |
| Si | 3.5959202899  | -5.2892382064 | -0.0781783339 |
| C  | -0.0104934681 | -3.4693429789 | -0.2021240448 |
| C  | -0.9898271818 | -4.4593448792 | -0.3025638156 |
| C  | -0.6147418147 | -5.8253289923 | -0.3299684933 |
| C  | 0.7367183532  | -6.1678688850 | -0.2660033147 |

|    |               |               |               |
|----|---------------|---------------|---------------|
| C  | -2.4523564989 | -4.1987448271 | -0.3891037981 |
| C  | -3.2693890793 | -5.3525007894 | -0.4721390557 |
| Si | -2.1669940784 | -6.8754187950 | -0.4476058298 |
| C  | -3.0453915733 | -2.9325039037 | -0.4003084347 |
| C  | -4.4300682022 | -2.8110898430 | -0.4919076868 |
| C  | -5.2373089184 | -3.9454497314 | -0.5719392873 |
| C  | -4.6538392037 | -5.2132543091 | -0.5618887622 |
| H  | -6.5766660148 | 3.4238800552  | -0.0191064443 |
| H  | -5.0083294890 | 1.5070797353  | -0.0304894991 |
| H  | -2.5796655315 | 1.8787576073  | 0.0737480509  |
| H  | -5.7064053810 | 5.7337238431  | 0.1038466239  |
| H  | -2.8894653407 | 7.5137525816  | 1.4925300682  |
| H  | -2.8096476304 | 7.6235042165  | -0.9090812316 |
| H  | -0.4709247471 | 2.4016493323  | 0.1564381649  |
| H  | 0.5285118412  | 7.2649597356  | 0.3766234172  |
| H  | 3.7149542552  | 6.1593429341  | 1.6329446158  |
| H  | 3.7926143235  | 6.2524432636  | -0.7688132999 |
| H  | 1.2401615020  | 1.1093531724  | 0.1325236048  |
| H  | 5.6471130877  | 3.3912590123  | 0.3929112455  |
| H  | 6.7956783938  | 0.1736374861  | 1.5347654440  |
| H  | 6.9187885141  | 0.2676799897  | -0.8650969317 |
| H  | 1.3152156822  | -1.0279271789 | 0.0047085536  |
| H  | 5.8662195130  | -3.0197500003 | 0.1426072085  |
| H  | 4.1085113997  | -6.0062171309 | 1.1194784407  |
| H  | 4.2310444272  | -5.8932318860 | -1.2794842485 |
| H  | -0.2989065931 | -2.4255732490 | -0.1772530191 |
| H  | 1.0258172990  | -7.2147471238 | -0.2900177674 |
| H  | -2.3860916876 | -7.7658901497 | 0.7228844840  |
| H  | -2.2516371799 | -7.7064694819 | -1.6776055713 |
| H  | -2.4376881206 | -2.0369638260 | -0.3417585367 |
| H  | -4.8824074339 | -1.8260293373 | -0.5028819502 |
| H  | -6.3138098287 | -3.8420136423 | -0.6433711368 |
| H  | -5.2894694022 | -6.0903327243 | -0.6273100914 |

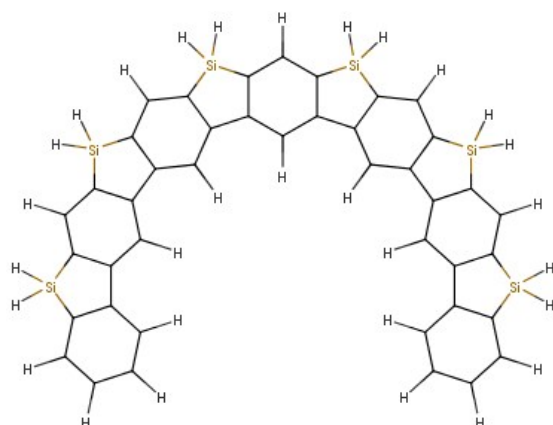

Carb6Si

78

|    |               |               |               |
|----|---------------|---------------|---------------|
| C  | -4.7923744750 | 3.5890535622  | 1.3270377464  |
| C  | -3.8558770112 | 2.5569590072  | 1.2771069602  |
| C  | -2.5171010088 | 2.8301481226  | 1.0045615123  |
| C  | -2.1002523064 | 4.1462200877  | 0.7824477032  |
| C  | -3.0494756310 | 5.1962022334  | 0.8364766851  |
| C  | -4.3862238331 | 4.9059848067  | 1.1061868902  |
| C  | -0.6997832848 | 4.5661960658  | 0.5044444339  |
| C  | -0.5072864146 | 5.9619007779  | 0.3557696347  |
| Si | -2.1662611059 | 6.8249782815  | 0.5297555484  |
| C  | 0.3888772270  | 3.6960421212  | 0.4039130474  |
| C  | 1.6729956918  | 4.1989645132  | 0.1799956425  |
| C  | 1.8731178082  | 5.5961335918  | 0.0555629278  |
| C  | 0.7781597568  | 6.4572498191  | 0.1352858887  |
| C  | 2.9069124155  | 3.3701337562  | 0.0894857255  |
| C  | 4.1132663187  | 4.1011566313  | -0.0423649557 |
| Si | 3.7079216615  | 5.9316940487  | -0.1485450489 |
| C  | 2.9382639530  | 1.9732716355  | 0.1380766784  |
| C  | 4.1594426377  | 1.2947983896  | 0.0911528356  |
| C  | 5.3702068754  | 2.0269176330  | 0.0088793444  |
| C  | 5.3293989135  | 3.4187344902  | -0.0720091753 |
| C  | 4.3178732941  | -0.1859820060 | 0.1480090374  |
| C  | 5.6581505994  | -0.6426642884 | 0.2028686150  |
| Si | 6.8134593208  | 0.8310752359  | 0.0844815899  |
| C  | 3.2667756062  | -1.1083507826 | 0.1426866371  |
| C  | 3.5325452768  | -2.4792895294 | 0.2180650130  |
| C  | 4.8707986576  | -2.9333324233 | 0.3259338290  |
| C  | 5.9151055292  | -2.0094845283 | 0.3044848521  |
| C  | 2.5011297914  | -3.5556286347 | 0.1965766113  |
| C  | 3.0032234174  | -4.8709226264 | 0.3604494673  |
| Si | 4.8723764906  | -4.8016237084 | 0.4979494892  |
| C  | 1.1304521769  | -3.3525921361 | 0.0094444085  |
| C  | 0.2520509418  | -4.4407866351 | -0.0050566048 |
| C  | 0.7500559691  | -5.7529877528 | 0.1907165083  |
| C  | 2.1194712302  | -5.9494893545 | 0.3652353419  |

|    |               |               |               |
|----|---------------|---------------|---------------|
| C  | -1.2194845551 | -4.3514771194 | -0.2239789503 |
| C  | -1.9135925922 | -5.5854954173 | -0.1620262188 |
| Si | -0.6826907211 | -6.9650572897 | 0.1513797821  |
| C  | -1.9191803687 | -3.1725048080 | -0.4951923507 |
| C  | -3.3012197868 | -3.2056377814 | -0.7031183795 |
| C  | -4.0001125123 | -4.4351834127 | -0.6198743437 |
| C  | -3.2950020438 | -5.6084819699 | -0.3537112758 |
| C  | -4.1431153073 | -2.0217719783 | -1.0289253894 |
| C  | -5.5272698166 | -2.2849841256 | -1.1793474585 |
| Si | -5.8264731765 | -4.1200893578 | -0.9199665414 |
| C  | -3.6680907839 | -0.7189026727 | -1.2057698729 |
| C  | -4.5514382296 | 0.3105342770  | -1.5249107008 |
| C  | -5.9149619164 | 0.0542077819  | -1.6669552063 |
| C  | -6.3986531360 | -1.2433217724 | -1.4943178324 |
| H  | -5.8321199451 | 3.3672749749  | 1.5389540685  |
| H  | -4.1708858950 | 1.5338591661  | 1.4458380878  |
| H  | -1.8063211400 | 2.0122264784  | 0.9746256596  |
| H  | -5.1214667994 | 5.7029749155  | 1.1504584382  |
| H  | -2.2429216676 | 7.7784837123  | 1.6682857194  |
| H  | -2.6106290812 | 7.5385643014  | -0.6969589415 |
| H  | 0.2380295399  | 2.6287803443  | 0.5149555514  |
| H  | 0.9304631357  | 7.5280431767  | 0.0343753272  |
| H  | 4.2948329746  | 6.7559566983  | 0.9414344343  |
| H  | 4.0792684159  | 6.5562043943  | -1.4462090406 |
| H  | 2.0133473793  | 1.4149746737  | 0.2226538942  |
| H  | 6.2565805011  | 3.9788552745  | -0.1534065232 |
| H  | 7.6916589207  | 1.0251434482  | 1.2689076245  |
| H  | 7.6751928579  | 0.8214694804  | -1.1275989215 |
| H  | 2.2428742622  | -0.7593842444 | 0.0752098549  |
| H  | 6.9416482182  | -2.3594512899 | 0.3666351876  |
| H  | 5.4133906561  | -5.2858472317 | 1.7957570296  |
| H  | 5.5827013879  | -5.5207830512 | -0.5928107553 |
| H  | 0.7490031308  | -2.3484281608 | -0.1348342340 |
| H  | 2.5031660748  | -6.9567863741 | 0.4997744468  |
| H  | -0.8921298661 | -7.6970075554 | 1.4289299578  |
| H  | -0.6066527523 | -7.9668904286 | -0.9451027735 |
| H  | -1.3886822793 | -2.2295904314 | -0.5553643471 |
| H  | -3.8273292239 | -6.5537757752 | -0.3006847847 |
| H  | -6.6947690423 | -4.4394857672 | 0.2443703762  |
| H  | -6.3820451029 | -4.8157357005 | -2.1110245841 |
| H  | -2.6118838808 | -0.4971414486 | -1.1038952982 |
| H  | -4.1749487248 | 1.3177933994  | -1.6584385498 |
| H  | -6.5950052234 | 0.8618644043  | -1.9126188280 |
| H  | -7.4604919792 | -1.4348991402 | -1.6108979585 |

Table 1: Computed total energies of optimized structures and their triplet energies

| Compound Name | Computed total energies (a.u) | Triplet energies (eV) |
|---------------|-------------------------------|-----------------------|
| CarbO         | -5.340439625E+02              | 3.17639               |
| Carb2O        | -7.474.403055E+02             | 3.08410               |
| Carb3O        | -1.140647019E+03              | 3.06642               |
| Carb4O        | -1.443948614E+03              | 3.05102               |
| Carb5O        | -1.747250263E+03              | 3.04162               |
| Carb6O        | -2.050550395E+03              | 3.03615               |
| CarbN         | -5.142178524E+02              | 3.18084               |
| Carb2N        | -7.976928543E+02              | 3.06827               |
| Carb3N        | -1.081167543E+03              | 3.02863               |
| Carb4N        | -1.364642139E+03              | 3.00474               |
| Carb5N        | -1.648116724E+03              | 2.99370               |
| Carb6N        | -1.93780699E+03               | 2.98780               |
| CarbC         | -4.982140790E+02              | 3.04181               |
| Carb2C        | -7.656860958E+02              | 2.88738               |
| Carb3C        | -1.033158737E+03              | 2.82263               |
| Carb4C        | -1.300630562E+03              | 2.78669               |
| Carb5C        | -1.568102331E+03              | 2.76774               |
| Carb6C        | -1.835575000E+03              | 2.75656               |
| CarbS         | -8.566842188E+02              | 3.09336               |
| Carb2S        | -1.482623240E+03              | 2.92602               |
| Carb3S        | -2.108563970E+03              | 2.85475               |
| Carb4S        | -2.309169697E+03              | 2.82124               |
| Carb5S        | -3.360442932E+03              | 2.80011               |
| Carb6S        | -3.986382598E+03              | 2.78914               |
| CarbP         | -8.004745641E+02              | 2.99534               |
| Carb2P        | -1.370205077E+03              | 2.81544               |
| Carb3P        | -1.939936133E+03              | 2.74207               |
| Carb4P        | -2.509667123E+03              | 2.70558               |
| Carb5P        | -3.079397885E+03              | 2.68481               |
| Carb6P        | -3.649127595E+03              | 2.67782               |
| CarbSi        | -7.492687461E+02              | 2.92038               |
| Carb2Si       | -1.267794224E+03              | 2.71056               |
| Carb3Si       | -1.786320061E+03              | 2.61982               |
| Carb4Si       | -2.304845021E+03              | 2.57345               |
| Carb5Si       | -2.823370740E+03              | 2.54554               |
| Carb6Si       | -3.341896263E+03              | 2.53003               |
